# Supplementary material for: Aromaticity of biphenylene networks
Source: Royal Society of Chemistry journal article supplement (doi:10.1039/d4cp03157a), 2024-01-01
Supplement: d4cp03157a1.pdf [file d4cp03157a1.pdf]

Supporting Information for

**Aromaticity of biphenylene networks**

Lenara I. Valiulina<sup>a</sup>, R. Valiyev<sup>b</sup>, Victor N. Cherepanov<sup>a</sup> and Elena V. Stepanova<sup>b</sup>

<sup>1</sup>Tomsk State University, 36 Lenin Avenue, Tomsk, 634050, Russia

<sup>2</sup>Research School of Chemistry and Applied Biomedical Sciences, National Research Tomsk Polytechnic University, Tomsk 634050, Russian Federation

Correspondence to: [valiulina.lenara.01.01.1998@gmail.com](mailto:valiulina.lenara.01.01.1998@gmail.com)

Table 1. The Cartesian coordinates of the optimized molecular structures of nBp-nanoribbons with armchair edges (n=2-10) at the B3LYP/6-31G(d,p) level of theory

|              |              |              |             |                 |              |              |             |
|--------------|--------------|--------------|-------------|-----------------|--------------|--------------|-------------|
| <b>2Bp_H</b> |              |              |             | <b>2Bp_F_Br</b> |              |              |             |
| 6            | -1.521510000 | 3.114443000  | 0.000000000 | 6               | 1.524779251  | 0.679261333  | 0.000000000 |
| 6            | 1.521510000  | 3.114443000  | 0.000000000 | 6               | 0.837463502  | 1.882511884  | 0.000000000 |
| 6            | 0.740239000  | 1.918288000  | 0.000000000 | 6               | -0.640242649 | 1.958830319  | 0.000000000 |
| 6            | -0.740239000 | 1.918288000  | 0.000000000 | 6               | -1.457427073 | 0.839617228  | 0.000000000 |
| 6            | -1.493252000 | 0.757482000  | 0.000000000 | 6               | -1.524779251 | -0.679261333 | 0.000000000 |
| 6            | -2.912732000 | 0.753376000  | 0.000000000 | 6               | -0.837463502 | -1.882511884 | 0.000000000 |
| 6            | -2.909858000 | 3.109763000  | 0.000000000 | 6               | 0.640242649  | -1.958830319 | 0.000000000 |
| 6            | 2.909858000  | 3.109763000  | 0.000000000 | 6               | 1.457427073  | -0.839617228 | 0.000000000 |
| 6            | 1.493252000  | 0.757482000  | 0.000000000 | 6               | 2.943696644  | 0.599568764  | 0.000000000 |
| 6            | 3.658637000  | 1.905828000  | 0.000000000 | 6               | 2.877285278  | -0.889129699 | 0.000000000 |
| 6            | 2.912732000  | 0.753376000  | 0.000000000 | 6               | 3.754128991  | 1.702382122  | 0.000000000 |
| 6            | -3.658637000 | 1.905828000  | 0.000000000 | 6               | 3.062265960  | 2.936767268  | 0.000000000 |
| 1            | -4.744308000 | 1.919295000  | 0.000000000 | 6               | 1.685131831  | 3.034061308  | 0.000000000 |
| 6            | -0.740239000 | -1.918288000 | 0.000000000 | 1               | 1.270201671  | 4.029365015  | 0.000000000 |
| 6            | -1.493252000 | -0.757482000 | 0.000000000 | 9               | 3.780931236  | 4.069460469  | 0.000000000 |
| 6            | -3.658637000 | -1.905828000 | 0.000000000 | 35              | 5.638667905  | 1.644711678  | 0.000000000 |
| 6            | -2.909858000 | -3.109763000 | 0.000000000 | 6               | 3.564635668  | -2.072967450 | 0.000000000 |
| 6            | -1.521510000 | -3.114443000 | 0.000000000 | 6               | 2.784147545  | -3.248413593 | 0.000000000 |
| 6            | 0.740239000  | -1.918288000 | 0.000000000 | 6               | 1.404569265  | -3.170594775 | 0.000000000 |
| 6            | 1.521510000  | -3.114443000 | 0.000000000 | 9               | 0.760995421  | -4.360396682 | 0.000000000 |
| 6            | 1.493252000  | -0.757482000 | 0.000000000 | 1               | 3.246683027  | -4.227798399 | 0.000000000 |
| 6            | 2.909858000  | -3.109763000 | 0.000000000 | 35              | 5.453807530  | -2.183759573 | 0.000000000 |
| 6            | 2.912732000  | -0.753376000 | 0.000000000 | 6               | -1.404569265 | 3.170594775  | 0.000000000 |
| 6            | 3.658637000  | -1.905828000 | 0.000000000 | 6               | -2.784147545 | 3.248413593  | 0.000000000 |
| 6            | -2.912732000 | -0.753376000 | 0.000000000 | 6               | -3.564635668 | 2.072967450  | 0.000000000 |
| 1            | -4.744308000 | -1.919295000 | 0.000000000 | 6               | -2.877285278 | 0.889129699  | 0.000000000 |
| 1            | -3.435798000 | -4.060728000 | 0.000000000 | 6               | -2.943696644 | -0.599568764 | 0.000000000 |
| 1            | -1.019368000 | -4.076141000 | 0.000000000 | 6               | -3.754128991 | -1.702382122 | 0.000000000 |
| 1            | 1.019368000  | -4.076141000 | 0.000000000 | 6               | -3.062265960 | -2.936767268 | 0.000000000 |
| 1            | 3.435798000  | -4.060728000 | 0.000000000 | 6               | -1.685131831 | -3.034061308 | 0.000000000 |
| 1            | -1.019368000 | 4.076141000  | 0.000000000 | 1               | -3.246683027 | 4.227798399  | 0.000000000 |
| 1            | 1.019368000  | 4.076141000  | 0.000000000 | 9               | -0.760995421 | 4.360396682  | 0.000000000 |
| 1            | -3.435798000 | 4.060728000  | 0.000000000 | 35              | -5.453807530 | 2.183759573  | 0.000000000 |
| 1            | 3.435798000  | 4.060728000  | 0.000000000 | 35              | -5.638667905 | -1.644711678 | 0.000000000 |
| 1            | 4.744308000  | 1.919295000  | 0.000000000 | 9               | -3.780931236 | -4.069460469 | 0.000000000 |
| 1            | 4.744308000  | -1.919295000 | 0.000000000 | 1               | -1.270201671 | -4.029365015 | 0.000000000 |
| <b>3Bp_H</b> |              |              |             | <b>3Bp_F_Br</b> |              |              |             |
| 6            | -5.118243000 | 3.110157000  | 0.000000000 | 6               | 5.939308289  | 1.726768788  | 0.000000000 |
| 6            | -5.870318000 | 1.907729000  | 0.000000000 | 6               | 5.214336694  | 2.941878069  | 0.000000000 |
| 6            | -3.730155000 | 3.112345000  | 0.000000000 | 6               | 3.835077126  | 3.003307263  | 0.000000000 |
| 6            | -5.126652000 | 0.753791000  | 0.000000000 | 6               | 3.015798972  | 1.829941213  | 0.000000000 |
| 6            | -2.951146000 | 1.914135000  | 0.000000000 | 6               | 3.737073924  | 0.648407325  | 0.000000000 |
| 6            | -3.707140000 | 0.756318000  | 0.000000000 | 6               | 5.157384762  | 0.603876677  | 0.000000000 |
| 6            | -5.870318000 | -1.907729000 | 0.000000000 | 35              | 7.824642945  | 1.718078296  | 0.000000000 |
| 6            | -5.118243000 | -3.110157000 | 0.000000000 | 9               | 5.903036160  | 4.093454479  | 0.000000000 |
| 6            | -5.126652000 | -0.753791000 | 0.000000000 | 1               | 3.396060032  | 3.987773553  | 0.000000000 |
| 6            | -3.730155000 | -3.112345000 | 0.000000000 | 6               | 5.125610668  | -0.885963271 | 0.000000000 |
| 6            | -3.707140000 | -0.756318000 | 0.000000000 | 6               | 3.704838746  | -0.866629440 | 0.000000000 |
| 6            | -2.951146000 | -1.914135000 | 0.000000000 | 6               | 2.908104078  | -1.998184972 | 0.000000000 |
| 1            | -5.642390000 | -4.062128000 | 0.000000000 | 6               | 5.836549403  | -2.055028378 | 0.000000000 |
| 1            | -3.226705000 | -4.073189000 | 0.000000000 | 6               | 5.078518197  | -3.245499532 | 0.000000000 |
| 6            | 0.692652000  | 3.105337000  | 0.000000000 | 6               | 3.697742529  | -3.195688445 | 0.000000000 |

|              |              |              |             |                 |              |              |             |
|--------------|--------------|--------------|-------------|-----------------|--------------|--------------|-------------|
| 6            | 3.730155000  | 3.112345000  | 0.000000000 | 35              | 7.727581033  | -2.126507954 | 0.000000000 |
| 6            | 2.951146000  | 1.914135000  | 0.000000000 | 1               | 5.559872880  | -4.215840476 | 0.000000000 |
| 6            | 1.472587000  | 1.911834000  | 0.000000000 | 9               | 3.082157916  | -4.400211671 | 0.000000000 |
| 6            | 0.707848000  | 0.757547000  | 0.000000000 | 6               | 1.537514107  | 1.869535634  | 0.000000000 |
| 6            | -0.707848000 | 0.757547000  | 0.000000000 | 6               | 0.723664139  | 0.742955599  | 0.000000000 |
| 6            | -0.692652000 | 3.105337000  | 0.000000000 | 6               | 0.693409191  | -0.772589439 | 0.000000000 |
| 6            | 5.118243000  | 3.110157000  | 0.000000000 | 6               | 1.430509803  | -1.950030861 | 0.000000000 |
| 6            | 3.707140000  | 0.756318000  | 0.000000000 | 6               | 0.620809376  | -3.118988567 | 0.000000000 |
| 6            | 5.870318000  | 1.907729000  | 0.000000000 | 6               | -0.756091571 | -3.061418485 | 0.000000000 |
| 6            | 5.126652000  | 0.753791000  | 0.000000000 | 6               | -1.537514107 | -1.869535634 | 0.000000000 |
| 6            | -1.472587000 | 1.911834000  | 0.000000000 | 6               | -0.723664139 | -0.742955599 | 0.000000000 |
| 6            | 1.472587000  | -1.911834000 | 0.000000000 | 6               | -0.693409191 | 0.772589439  | 0.000000000 |
| 6            | 0.707848000  | -0.757547000 | 0.000000000 | 6               | 0.756091571  | 3.061418485  | 0.000000000 |
| 6            | -1.472587000 | -1.911834000 | 0.000000000 | 6               | -0.620809376 | 3.118988567  | 0.000000000 |
| 6            | -0.692652000 | -3.105337000 | 0.000000000 | 6               | -1.430509803 | 1.950030861  | 0.000000000 |
| 6            | 0.692652000  | -3.105337000 | 0.000000000 | 9               | 1.375705736  | 4.266339829  | 0.000000000 |
| 6            | 2.951146000  | -1.914135000 | 0.000000000 | 1               | -1.057777874 | 4.104134258  | 0.000000000 |
| 6            | 3.730155000  | -3.112345000 | 0.000000000 | 1               | 1.057777874  | -4.104134258 | 0.000000000 |
| 6            | 3.707140000  | -0.756318000 | 0.000000000 | 9               | -1.375705736 | -4.266339829 | 0.000000000 |
| 6            | 5.118243000  | -3.110157000 | 0.000000000 | 6               | -3.015798972 | -1.829941213 | 0.000000000 |
| 6            | 5.126652000  | -0.753791000 | 0.000000000 | 6               | -3.737073924 | -0.648407325 | 0.000000000 |
| 6            | 5.870318000  | -1.907729000 | 0.000000000 | 6               | -2.908104078 | 1.998184972  | 0.000000000 |
| 6            | -0.707848000 | -0.757547000 | 0.000000000 | 6               | -3.704838746 | 0.866629440  | 0.000000000 |
| 1            | 6.955974000  | 1.924073000  | 0.000000000 | 6               | -5.125610668 | 0.885963271  | 0.000000000 |
| 1            | -1.192402000 | -4.068083000 | 0.000000000 | 6               | -5.157384762 | -0.603876677 | 0.000000000 |
| 1            | 1.192402000  | -4.068083000 | 0.000000000 | 6               | -5.939308289 | -1.726768788 | 0.000000000 |
| 1            | 3.226705000  | -4.073189000 | 0.000000000 | 6               | -5.214336694 | -2.941878069 | 0.000000000 |
| 1            | 5.642390000  | -4.062128000 | 0.000000000 | 6               | -3.835077126 | -3.003307263 | 0.000000000 |
| 1            | 6.955974000  | -1.924073000 | 0.000000000 | 1               | -3.396060032 | -3.987773553 | 0.000000000 |
| 1            | -5.642390000 | 4.062128000  | 0.000000000 | 9               | -5.903036160 | -4.093454479 | 0.000000000 |
| 1            | -6.955974000 | 1.924073000  | 0.000000000 | 35              | -7.824642945 | -1.718078296 | 0.000000000 |
| 1            | -3.226705000 | 4.073189000  | 0.000000000 | 6               | -3.697742529 | 3.195688445  | 0.000000000 |
| 1            | -6.955974000 | -1.924073000 | 0.000000000 | 6               | -5.078518197 | 3.245499532  | 0.000000000 |
| 1            | 1.192402000  | 4.068083000  | 0.000000000 | 6               | -5.836549403 | 2.055028378  | 0.000000000 |
| 1            | 3.226705000  | 4.073189000  | 0.000000000 | 35              | -7.727581033 | 2.126507954  | 0.000000000 |
| 1            | -1.192402000 | 4.068083000  | 0.000000000 | 1               | -5.559872880 | 4.215840476  | 0.000000000 |
| 1            | 5.642390000  | 4.062128000  | 0.000000000 | 9               | -3.082157916 | 4.400211671  | 0.000000000 |
| <b>4Bp_H</b> |              |              |             | <b>4Bp_F_Br</b> |              |              |             |
| 6            | -5.941524000 | 3.112688000  | 0.000000000 | 6               | 8.147165053  | 1.744226979  | 0.000000000 |
| 6            | -2.902639000 | 3.104884000  | 0.000000000 | 6               | 7.410331961  | 2.952404629  | 0.000000000 |
| 6            | -3.684244000 | 1.911904000  | 0.000000000 | 6               | 6.030445669  | 3.000251490  | 0.000000000 |
| 6            | -5.162622000 | 1.914251000  | 0.000000000 | 6               | 5.223035759  | 1.818999210  | 0.000000000 |
| 6            | -5.918354000 | 0.756375000  | 0.000000000 | 6               | 5.955659886  | 0.644361989  | 0.000000000 |
| 6            | -7.337763000 | 0.753587000  | 0.000000000 | 6               | 7.376341749  | 0.613640744  | 0.000000000 |
| 6            | -7.329501000 | 3.110286000  | 0.000000000 | 35              | 10.032523056 | 1.753058686  | 0.000000000 |
| 6            | -1.517444000 | 3.103700000  | 0.000000000 | 6               | 3.744797075  | 1.843657096  | 0.000000000 |
| 6            | -2.920616000 | 0.757436000  | 0.000000000 | 6               | 2.943900878  | 0.708688894  | 0.000000000 |
| 6            | -0.738382000 | 1.908363000  | 0.000000000 | 6               | 2.928859457  | -0.806701450 | 0.000000000 |
| 6            | -1.505340000 | 0.756349000  | 0.000000000 | 6               | 1.526776856  | 0.722407350  | 0.000000000 |
| 6            | -8.081426000 | 1.907442000  | 0.000000000 | 6               | 1.511729995  | -0.789245024 | 0.000000000 |
| 1            | -9.167057000 | 1.923925000  | 0.000000000 | 6               | 3.675109696  | -1.977415666 | 0.000000000 |
| 6            | -5.162622000 | -1.914251000 | 0.000000000 | 6               | 5.152873556  | -2.011189633 | 0.000000000 |
| 6            | -5.918354000 | -0.756375000 | 0.000000000 | 6               | 5.938289960  | -0.871431580 | 0.000000000 |
| 6            | -8.081426000 | -1.907442000 | 0.000000000 | 6               | 7.359099037  | -0.876671875 | 0.000000000 |
| 6            | -7.329501000 | -3.110286000 | 0.000000000 | 6               | 8.081310710  | -2.038944286 | 0.000000000 |
| 6            | -5.941524000 | -3.112688000 | 0.000000000 | 6               | 7.335216214  | -3.236875191 | 0.000000000 |
| 6            | -3.684244000 | -1.911904000 | 0.000000000 | 6               | 5.953895905  | -3.200770083 | 0.000000000 |
| 6            | -2.902639000 | -3.104884000 | 0.000000000 | 9               | 5.349323254  | -4.411117993 | 0.000000000 |
| 6            | -2.920616000 | -0.757436000 | 0.000000000 | 1               | 7.826285611  | -4.202297204 | 0.000000000 |
| 6            | -1.517444000 | -3.103700000 | 0.000000000 | 35              | 9.972957613  | -2.092481804 | 0.000000000 |
| 6            | -1.505340000 | -0.756349000 | 0.000000000 | 9               | 8.087572020  | 4.110759008  | 0.000000000 |
| 6            | -0.738382000 | -1.908363000 | 0.000000000 | 1               | 5.580878044  | 3.980157858  | 0.000000000 |
| 6            | -7.337763000 | -0.753587000 | 0.000000000 | 6               | 2.948188776  | 3.025584689  | 0.000000000 |
| 1            | -9.167057000 | -1.923925000 | 0.000000000 | 6               | 1.570490611  | 3.066246398  | 0.000000000 |
| 1            | -7.854066000 | -4.061990000 | 0.000000000 | 6               | 0.773012804  | 1.887277056  | 0.000000000 |
| 1            | -5.437818000 | -4.073399000 | 0.000000000 | 6               | 0.704197306  | -1.918063864 | 0.000000000 |
| 1            | -3.401489000 | -4.068107000 | 0.000000000 | 6               | 1.495788873  | -3.105300913 | 0.000000000 |
| 1            | -1.016836000 | -4.065985000 | 0.000000000 | 6               | 2.873298233  | -3.152131438 | 0.000000000 |
| 6            | 2.902639000  | 3.104884000  | 0.000000000 | 1               | 3.317392621  | -4.134160445 | 0.000000000 |
| 6            | 5.941524000  | 3.112688000  | 0.000000000 | 9               | 0.888509161  | -4.316923314 | 0.000000000 |
| 6            | 5.162622000  | 1.914251000  | 0.000000000 | 6               | -0.704197306 | 1.918063864  | 0.000000000 |
| 6            | 3.684244000  | 1.911904000  | 0.000000000 | 6               | -1.511729995 | 0.789245024  | 0.000000000 |
| 6            | 2.920616000  | 0.757436000  | 0.000000000 | 6               | -1.526776856 | -0.722407350 | 0.000000000 |
| 6            | 1.505340000  | 0.756349000  | 0.000000000 | 6               | -0.773012804 | -1.887277056 | 0.000000000 |

|              |               |              |             |                 |               |              |             |
|--------------|---------------|--------------|-------------|-----------------|---------------|--------------|-------------|
| 6            | 1.517444000   | 3.103700000  | 0.000000000 | 6               | -1.570490611  | -3.066246398 | 0.000000000 |
| 6            | 7.329501000   | 3.110286000  | 0.000000000 | 6               | -2.948188776  | -3.025584689 | 0.000000000 |
| 6            | 5.918354000   | 0.756375000  | 0.000000000 | 6               | -3.744797075  | -1.843657096 | 0.000000000 |
| 6            | 8.081426000   | 1.907442000  | 0.000000000 | 6               | -2.943900878  | -0.708688894 | 0.000000000 |
| 6            | 7.337763000   | 0.753587000  | 0.000000000 | 6               | -2.928859457  | 0.806701450  | 0.000000000 |
| 6            | 0.738382000   | 1.908363000  | 0.000000000 | 6               | -1.495788873  | 3.105300913  | 0.000000000 |
| 6            | 3.684244000   | -1.911904000 | 0.000000000 | 6               | -2.873298233  | 3.152131438  | 0.000000000 |
| 6            | 2.920616000   | -0.757436000 | 0.000000000 | 6               | -3.675109696  | 1.977415666  | 0.000000000 |
| 6            | 0.738382000   | -1.908363000 | 0.000000000 | 6               | -5.152873556  | 2.011189633  | 0.000000000 |
| 6            | 1.517444000   | -3.103700000 | 0.000000000 | 6               | -5.938289960  | 0.871431580  | 0.000000000 |
| 6            | 2.902639000   | -3.104884000 | 0.000000000 | 6               | -5.955659886  | -0.644361989 | 0.000000000 |
| 6            | 5.162622000   | -1.914251000 | 0.000000000 | 6               | -5.223035759  | -1.818999210 | 0.000000000 |
| 6            | 5.941524000   | -3.112688000 | 0.000000000 | 6               | -7.359099037  | 0.876671875  | 0.000000000 |
| 6            | 5.918354000   | -0.756375000 | 0.000000000 | 6               | -7.376341749  | -0.613640744 | 0.000000000 |
| 6            | 7.329501000   | -3.110286000 | 0.000000000 | 6               | -8.147165053  | -1.744226979 | 0.000000000 |
| 6            | 7.337763000   | -0.753587000 | 0.000000000 | 6               | -7.410331961  | -2.952404629 | 0.000000000 |
| 6            | 8.081426000   | -1.907442000 | 0.000000000 | 6               | -6.030445669  | -3.000251490 | 0.000000000 |
| 6            | 1.505340000   | -0.756349000 | 0.000000000 | 1               | -5.580878044  | -3.980157858 | 0.000000000 |
| 1            | 9.167057000   | 1.923925000  | 0.000000000 | 9               | -8.087572020  | -4.110759008 | 0.000000000 |
| 1            | 1.016836000   | -4.065985000 | 0.000000000 | 35              | -10.032523056 | -1.753058686 | 0.000000000 |
| 1            | 3.401489000   | -4.068107000 | 0.000000000 | 9               | -3.554026800  | -4.238007510 | 0.000000000 |
| 1            | 5.437818000   | -4.073399000 | 0.000000000 | 1               | -1.122894069  | -4.046283723 | 0.000000000 |
| 1            | 7.854066000   | -4.061990000 | 0.000000000 | 1               | -3.317392621  | 4.134160445  | 0.000000000 |
| 1            | 9.167057000   | -1.923925000 | 0.000000000 | 9               | -0.888509161  | 4.316923314  | 0.000000000 |
| 1            | -5.437818000  | 4.073399000  | 0.000000000 | 1               | 1.122894069   | 4.046283723  | 0.000000000 |
| 1            | -3.401489000  | 4.068107000  | 0.000000000 | 9               | 3.554026800   | 4.238007510  | 0.000000000 |
| 1            | -7.854066000  | 4.061990000  | 0.000000000 | 6               | -5.953895905  | 3.200770083  | 0.000000000 |
| 1            | -1.016836000  | 4.065985000  | 0.000000000 | 6               | -7.335216214  | 3.236875191  | 0.000000000 |
| 1            | 3.401489000   | 4.068107000  | 0.000000000 | 6               | -8.081310710  | 2.038944286  | 0.000000000 |
| 1            | 5.437818000   | 4.073399000  | 0.000000000 | 35              | -9.972957613  | 2.092481804  | 0.000000000 |
| 1            | 1.016836000   | 4.065985000  | 0.000000000 | 1               | -7.826285611  | 4.202297204  | 0.000000000 |
| 1            | 7.854066000   | 4.061990000  | 0.000000000 | 9               | -5.349323254  | 4.411117993  | 0.000000000 |
| <b>5Bp_H</b> |               |              |             | <b>5Bp_F_Br</b> |               |              |             |
| 6            | -8.152808000  | 3.112808000  | 0.000000000 | 6               | -10.362825248 | -1.757254965 | 0.000000000 |
| 6            | -5.895348000  | 1.912663000  | 0.000000000 | 6               | -9.619999519  | -2.961545835 | 0.000000000 |
| 6            | -7.373680000  | 1.914884000  | 0.000000000 | 6               | -8.239932155  | -3.002545488 | 0.000000000 |
| 6            | -8.129191000  | 0.756535000  | 0.000000000 | 6               | -7.438432551  | -1.817103172 | 0.000000000 |
| 6            | -9.548543000  | 0.753633000  | 0.000000000 | 6               | -8.177151880  | -0.646124311 | 0.000000000 |
| 6            | -9.540987000  | 3.110193000  | 0.000000000 | 6               | -9.597887381  | -0.622663440 | 0.000000000 |
| 6            | -3.728575000  | 3.104211000  | 0.000000000 | 6               | -5.959943881  | -1.834229528 | 0.000000000 |
| 6            | -5.131711000  | 0.757665000  | 0.000000000 | 6               | -5.165245744  | -0.694791010 | 0.000000000 |
| 6            | -2.949715000  | 1.909506000  | 0.000000000 | 6               | -5.157064838  | -3.012048217 | 0.000000000 |
| 6            | -3.716283000  | 0.756714000  | 0.000000000 | 6               | -3.779234887  | -3.045768662 | 0.000000000 |
| 6            | -10.292442000 | 1.907576000  | 0.000000000 | 6               | -2.988323313  | -1.862497643 | 0.000000000 |
| 1            | -11.378107000 | 1.923255000  | 0.000000000 | 6               | -3.748189815  | -0.701323656 | 0.000000000 |
| 6            | -7.373680000  | -1.914884000 | 0.000000000 | 6               | -5.158054730  | 0.820744489  | 0.000000000 |
| 6            | -8.129191000  | -0.756535000 | 0.000000000 | 6               | -8.167581092  | 0.869661008  | 0.000000000 |
| 6            | -10.292442000 | -1.907576000 | 0.000000000 | 6               | -7.388359097  | 2.013599962  | 0.000000000 |
| 6            | -9.540987000  | -3.110193000 | 0.000000000 | 6               | -5.910432071  | 1.987660394  | 0.000000000 |
| 6            | -8.152808000  | -3.112808000 | 0.000000000 | 6               | -3.740956187  | 0.810629448  | 0.000000000 |
| 6            | -5.895348000  | -1.912663000 | 0.000000000 | 6               | -9.588441758  | 0.867601879  | 0.000000000 |
| 6            | -5.113834000  | -3.105279000 | 0.000000000 | 6               | -10.316822339 | 2.025946788  | 0.000000000 |
| 6            | -5.131711000  | -0.757665000 | 0.000000000 | 6               | -9.577095133  | 3.227938726  | 0.000000000 |
| 6            | -3.728575000  | -3.104211000 | 0.000000000 | 6               | -8.195712664  | 3.198916030  | 0.000000000 |
| 6            | -3.716283000  | -0.756714000 | 0.000000000 | 6               | -5.115029275  | 3.166994730  | 0.000000000 |
| 6            | -2.949715000  | -1.909506000 | 0.000000000 | 6               | -3.737376475  | 3.127154805  | 0.000000000 |
| 6            | -9.548543000  | -0.753633000 | 0.000000000 | 6               | -2.939909175  | 1.944212677  | 0.000000000 |
| 1            | -11.378107000 | -1.923255000 | 0.000000000 | 6               | -1.511237178  | -1.885148554 | 0.000000000 |
| 1            | -10.065369000 | -4.061963000 | 0.000000000 | 6               | -0.711908844  | -0.751446685 | 0.000000000 |
| 1            | -7.649514000  | -4.073731000 | 0.000000000 | 6               | 0.705072922   | -0.759643722 | 0.000000000 |
| 1            | -5.612681000  | -4.068455000 | 0.000000000 | 6               | 1.462813858   | -1.921025828 | 0.000000000 |
| 1            | -3.228006000  | -4.066457000 | 0.000000000 | 6               | 0.668078528   | -3.102444007 | 0.000000000 |
| 6            | 0.692609000   | 3.103488000  | 0.000000000 | 6               | -0.709746982  | -3.065920808 | 0.000000000 |
| 6            | 1.473344000   | 1.909548000  | 0.000000000 | 9               | -1.308609978  | -4.281725317 | 0.000000000 |
| 6            | 0.707644000   | 0.756635000  | 0.000000000 | 1               | 1.118287615   | -4.081389313 | 0.000000000 |
| 6            | -0.707644000  | 0.756635000  | 0.000000000 | 1               | -3.325819258  | -4.023232344 | 0.000000000 |
| 6            | -0.692609000  | 3.103488000  | 0.000000000 | 9               | -5.756305410  | -4.227501005 | 0.000000000 |
| 6            | -1.473344000  | 1.909548000  | 0.000000000 | 1               | -7.785590620  | -3.980083977 | 0.000000000 |
| 6            | 1.473344000   | -1.909548000 | 0.000000000 | 9               | -10.291771350 | -4.123142026 | 0.000000000 |
| 6            | 0.707644000   | -0.756635000 | 0.000000000 | 35              | -12.248230358 | -1.776727623 | 0.000000000 |
| 6            | -1.473344000  | -1.909548000 | 0.000000000 | 35              | -12.208862824 | 2.068782262  | 0.000000000 |
| 6            | -0.692609000  | -3.103488000 | 0.000000000 | 1               | -10.073268601 | 4.190779573  | 0.000000000 |
| 6            | 0.692609000   | -3.103488000 | 0.000000000 | 9               | -7.597459531  | 4.412169823  | 0.000000000 |
| 6            | -0.707644000  | -0.756635000 | 0.000000000 | 1               | -5.564391968  | 4.146616384  | 0.000000000 |

|              |               |              |             |                 |              |              |             |
|--------------|---------------|--------------|-------------|-----------------|--------------|--------------|-------------|
| 1            | -1.192022000  | -4.066322000 | 0.000000000 | 9               | -3.135271134 | 4.341104521  | 0.000000000 |
| 1            | 1.192022000   | -4.066322000 | 0.000000000 | 6               | -1.462813858 | 1.921025828  | 0.000000000 |
| 1            | -7.649514000  | 4.073731000  | 0.000000000 | 6               | -0.705072922 | 0.759643722  | 0.000000000 |
| 1            | -10.065369000 | 4.061963000  | 0.000000000 | 6               | 0.711908844  | 0.751446685  | 0.000000000 |
| 1            | -3.228006000  | 4.066457000  | 0.000000000 | 6               | 1.511237178  | 1.885148554  | 0.000000000 |
| 1            | 1.192022000   | 4.066322000  | 0.000000000 | 6               | 0.709746982  | 3.065920808  | 0.000000000 |
| 1            | -1.192022000  | 4.066322000  | 0.000000000 | 6               | -0.668078528 | 3.102444007  | 0.000000000 |
| 6            | 3.728575000   | 3.104211000  | 0.000000000 | 1               | -1.118287615 | 4.081389313  | 0.000000000 |
| 6            | 2.949715000   | 1.909506000  | 0.000000000 | 9               | 1.308609978  | 4.281725317  | 0.000000000 |
| 6            | 5.113834000   | 3.105279000  | 0.000000000 | 6               | 2.939909175  | -1.944212677 | 0.000000000 |
| 6            | 3.716283000   | 0.756714000  | 0.000000000 | 6               | 2.988323313  | 1.862497643  | 0.000000000 |
| 6            | 5.895348000   | 1.912663000  | 0.000000000 | 6               | 3.748189815  | 0.701323656  | 0.000000000 |
| 6            | 5.131711000   | 0.757665000  | 0.000000000 | 6               | 3.740956187  | -0.810629448 | 0.000000000 |
| 6            | 2.949715000   | -1.909506000 | 0.000000000 | 6               | 3.737376475  | -3.127154805 | 0.000000000 |
| 6            | 3.728575000   | -3.104211000 | 0.000000000 | 6               | 5.115029275  | -3.166994730 | 0.000000000 |
| 6            | 3.716283000   | -0.756714000 | 0.000000000 | 6               | 5.910432071  | -1.987660394 | 0.000000000 |
| 6            | 5.113834000   | -3.105279000 | 0.000000000 | 6               | 5.158054730  | -0.820744489 | 0.000000000 |
| 6            | 5.131711000   | -0.757665000 | 0.000000000 | 6               | 5.165245744  | 0.694791010  | 0.000000000 |
| 6            | 5.895348000   | -1.912663000 | 0.000000000 | 6               | 5.959943881  | 1.834229528  | 0.000000000 |
| 1            | 3.228006000   | -4.066457000 | 0.000000000 | 6               | 5.157064838  | 3.012048217  | 0.000000000 |
| 1            | 5.612681000   | -4.068455000 | 0.000000000 | 6               | 3.779234887  | 3.045768662  | 0.000000000 |
| 1            | 3.228006000   | 4.066457000  | 0.000000000 | 1               | 3.325819258  | 4.023232344  | 0.000000000 |
| 1            | 5.612681000   | 4.068455000  | 0.000000000 | 9               | 5.756305410  | 4.227501005  | 0.000000000 |
| 6            | 8.152808000   | 3.112808000  | 0.000000000 | 9               | 3.135271134  | -4.341104521 | 0.000000000 |
| 6            | 7.373680000   | 1.914884000  | 0.000000000 | 1               | 5.564391968  | -4.146616384 | 0.000000000 |
| 6            | 9.540987000   | 3.110193000  | 0.000000000 | 6               | 7.388359097  | -2.013599962 | 0.000000000 |
| 6            | 8.129191000   | 0.756535000  | 0.000000000 | 6               | 8.167581092  | -0.869661008 | 0.000000000 |
| 6            | 10.292442000  | 1.907576000  | 0.000000000 | 6               | 8.177151880  | 0.646124311  | 0.000000000 |
| 6            | 9.548543000   | 0.753633000  | 0.000000000 | 6               | 7.438432551  | 1.817103172  | 0.000000000 |
| 6            | 7.373680000   | -1.914884000 | 0.000000000 | 6               | 8.239932155  | 3.002545488  | 0.000000000 |
| 6            | 8.152808000   | -3.112808000 | 0.000000000 | 6               | 9.619999519  | 2.961545835  | 0.000000000 |
| 6            | 8.129191000   | -0.756535000 | 0.000000000 | 6               | 10.362825248 | 1.757254965  | 0.000000000 |
| 6            | 9.540987000   | -3.110193000 | 0.000000000 | 6               | 9.597887381  | 0.622663440  | 0.000000000 |
| 6            | 9.548543000   | -0.753633000 | 0.000000000 | 6               | 9.588441758  | -0.867601879 | 0.000000000 |
| 6            | 10.292442000  | -1.907576000 | 0.000000000 | 6               | 10.316822339 | -2.025946788 | 0.000000000 |
| 1            | 11.378107000  | 1.923255000  | 0.000000000 | 6               | 8.195712664  | -3.198916030 | 0.000000000 |
| 1            | 7.649514000   | -4.073731000 | 0.000000000 | 6               | 9.577095133  | -3.227938726 | 0.000000000 |
| 1            | 10.065369000  | -4.061963000 | 0.000000000 | 9               | 7.597459531  | -4.412169823 | 0.000000000 |
| 1            | 11.378107000  | -1.923255000 | 0.000000000 | 1               | 10.073268601 | -4.190779573 | 0.000000000 |
| 1            | 7.649514000   | 4.073731000  | 0.000000000 | 35              | 12.208862824 | -2.068782262 | 0.000000000 |
| 1            | 10.065369000  | 4.061963000  | 0.000000000 | 35              | 12.248230358 | 1.776727623  | 0.000000000 |
| 6            | -5.113834000  | 3.105279000  | 0.000000000 | 9               | 10.291771350 | 4.123142026  | 0.000000000 |
| 1            | -5.612681000  | 4.068455000  | 0.000000000 | 1               | 7.785590620  | 3.980083977  | 0.000000000 |
| <b>6Bp_H</b> |               |              |             | <b>6Bp_F_Br</b> |              |              |             |
| 6            | -10.363746000 | 3.112566000  | 0.000000000 | 6               | 12.582676090 | 1.767800681  | 0.000000000 |
| 6            | -8.106587000  | 1.912341000  | 0.000000000 | 6               | 11.835732956 | 2.969510194  | 0.000000000 |
| 6            | -9.584802000  | 1.914560000  | 0.000000000 | 6               | 10.455498507 | 3.006200062  | 0.000000000 |
| 6            | -10.340436000 | 0.756486000  | 0.000000000 | 6               | 9.657873491  | 1.818316624  | 0.000000000 |
| 6            | -11.759542000 | 0.753612000  | 0.000000000 | 6               | 10.400491085 | 0.649701267  | 0.000000000 |
| 6            | -11.752031000 | 3.110078000  | 0.000000000 | 6               | 11.821253094 | 0.630705624  | 0.000000000 |
| 6            | -5.939951000  | 3.104196000  | 0.000000000 | 6               | 11.816317599 | -0.859574866 | 0.000000000 |
| 6            | -7.342816000  | 0.757665000  | 0.000000000 | 6               | 10.395469674 | -0.866020868 | 0.000000000 |
| 6            | -5.160910000  | 1.909439000  | 0.000000000 | 6               | 12.548457725 | -2.015432437 | 0.000000000 |
| 6            | -5.927636000  | 0.756608000  | 0.000000000 | 6               | 11.812815524 | -3.219929462 | 0.000000000 |
| 6            | -12.503540000 | 1.907498000  | 0.000000000 | 6               | 10.431360484 | -3.195146674 | 0.000000000 |
| 1            | -13.589204000 | 1.923301000  | 0.000000000 | 6               | 9.619956634  | -2.012475092 | 0.000000000 |
| 6            | -9.584802000  | -1.914560000 | 0.000000000 | 6               | 8.141864011  | -1.991796457 | 0.000000000 |
| 6            | -10.340436000 | -0.756486000 | 0.000000000 | 6               | 7.385697655  | -0.827256715 | 0.000000000 |
| 6            | -12.503540000 | -1.907498000 | 0.000000000 | 6               | 7.388256021  | 0.688219866  | 0.000000000 |
| 6            | -11.752031000 | -3.110078000 | 0.000000000 | 6               | 8.179453952  | 1.830078161  | 0.000000000 |
| 6            | -10.363746000 | -3.112566000 | 0.000000000 | 6               | 7.373095300  | 3.005373963  | 0.000000000 |
| 6            | -8.106587000  | -1.912341000 | 0.000000000 | 6               | 5.995242608  | 3.035134293  | 0.000000000 |
| 6            | -7.325328000  | -3.105018000 | 0.000000000 | 6               | 5.207761693  | 1.849541986  | 0.000000000 |
| 6            | -7.342816000  | -0.757665000 | 0.000000000 | 6               | 5.971180222  | 0.690589761  | 0.000000000 |
| 6            | -5.939951000  | -3.104196000 | 0.000000000 | 6               | 5.968510640  | -0.821369997 | 0.000000000 |
| 6            | -5.927636000  | -0.756608000 | 0.000000000 | 6               | 5.170933197  | -1.957427081 | 0.000000000 |
| 6            | -5.160910000  | -1.909439000 | 0.000000000 | 6               | 5.972247396  | -3.137782918 | 0.000000000 |
| 6            | -11.759542000 | -0.753612000 | 0.000000000 | 6               | 7.349959039  | -3.173525199 | 0.000000000 |
| 1            | -13.589204000 | -1.923301000 | 0.000000000 | 6               | 3.730649305  | 1.867398806  | 0.000000000 |
| 1            | -12.276311000 | -4.061934000 | 0.000000000 | 6               | 2.925731377  | 3.045862702  | 0.000000000 |
| 1            | -9.860598000  | -4.073576000 | 0.000000000 | 6               | 1.547775687  | 3.078562797  | 0.000000000 |
| 1            | -7.824028000  | -4.068279000 | 0.000000000 | 6               | 0.756853600  | 1.894807866  | 0.000000000 |
| 1            | -5.439546000  | -4.066599000 | 0.000000000 | 6               | 1.517976105  | 0.735347635  | 0.000000000 |
| 6            | -1.518623000  | 3.103789000  | 0.000000000 | 6               | 2.934819266  | 0.731133146  | 0.000000000 |

|              |               |              |             |                 |               |              |             |
|--------------|---------------|--------------|-------------|-----------------|---------------|--------------|-------------|
| 6            | -0.738046000  | 1.909863000  | 0.000000000 | 6               | 2.932499688   | -0.780112838 | 0.000000000 |
| 6            | -1.503586000  | 0.756773000  | 0.000000000 | 6               | 1.515562346   | -0.776057251 | 0.000000000 |
| 6            | -2.918562000  | 0.756584000  | 0.000000000 | 6               | 3.693700317   | -1.939410828 | 0.000000000 |
| 6            | -2.903966000  | 3.103661000  | 0.000000000 | 6               | 2.902483899   | -3.123377094 | 0.000000000 |
| 6            | -3.684545000  | 1.909521000  | 0.000000000 | 6               | 1.524581646   | -3.090764454 | 0.000000000 |
| 6            | -0.738046000  | -1.909863000 | 0.000000000 | 6               | 0.719973194   | -1.912545168 | 0.000000000 |
| 6            | -1.503586000  | -0.756773000 | 0.000000000 | 6               | -0.719973194  | 1.912545168  | 0.000000000 |
| 6            | -3.684545000  | -1.909521000 | 0.000000000 | 6               | -1.515562346  | 0.776057251  | 0.000000000 |
| 6            | -2.903966000  | -3.103661000 | 0.000000000 | 6               | -1.517976105  | -0.735347635 | 0.000000000 |
| 6            | -1.518623000  | -3.103789000 | 0.000000000 | 6               | -0.756853600  | -1.894807866 | 0.000000000 |
| 6            | -2.918562000  | -0.756584000 | 0.000000000 | 6               | -2.932499688  | 0.780112838  | 0.000000000 |
| 1            | -3.403492000  | -4.066493000 | 0.000000000 | 6               | -2.934819266  | -0.731133146 | 0.000000000 |
| 1            | -1.019279000  | -4.066711000 | 0.000000000 | 6               | -3.693700317  | 1.939410828  | 0.000000000 |
| 1            | -9.860598000  | 4.073576000  | 0.000000000 | 6               | -5.170933197  | 1.957427081  | 0.000000000 |
| 1            | -12.276311000 | 4.061934000  | 0.000000000 | 6               | -5.968510640  | 0.821369997  | 0.000000000 |
| 1            | -5.439546000  | 4.066599000  | 0.000000000 | 6               | -5.971180222  | -0.690589761 | 0.000000000 |
| 1            | -1.019279000  | 4.066711000  | 0.000000000 | 6               | -5.207761693  | -1.849541986 | 0.000000000 |
| 1            | -3.403492000  | 4.066493000  | 0.000000000 | 6               | -3.730649305  | -1.867398806 | 0.000000000 |
| 6            | 1.518623000   | 3.103789000  | 0.000000000 | 6               | -2.925731377  | -3.045862702 | 0.000000000 |
| 6            | 0.738046000   | 1.909863000  | 0.000000000 | 6               | -1.547775687  | -3.078562797 | 0.000000000 |
| 6            | 2.903966000   | 3.103661000  | 0.000000000 | 6               | -1.524581646  | 3.090764454  | 0.000000000 |
| 6            | 1.503586000   | 0.756773000  | 0.000000000 | 6               | -2.902483899  | 3.123377094  | 0.000000000 |
| 6            | 3.684545000   | 1.909521000  | 0.000000000 | 6               | -5.972247396  | 3.137782918  | 0.000000000 |
| 6            | 2.918562000   | 0.756584000  | 0.000000000 | 6               | -7.349959039  | 3.173525199  | 0.000000000 |
| 6            | 0.738046000   | -1.909863000 | 0.000000000 | 6               | -8.141864011  | 1.991796457  | 0.000000000 |
| 6            | 1.518623000   | -3.103789000 | 0.000000000 | 6               | -7.385697655  | 0.827256715  | 0.000000000 |
| 6            | 1.503586000   | -0.756773000 | 0.000000000 | 6               | -7.388256021  | -0.688219866 | 0.000000000 |
| 6            | 2.903966000   | -3.103661000 | 0.000000000 | 6               | -8.179453952  | -1.830078161 | 0.000000000 |
| 6            | 2.918562000   | -0.756584000 | 0.000000000 | 6               | -7.373095300  | -3.005373963 | 0.000000000 |
| 6            | 3.684545000   | -1.909521000 | 0.000000000 | 6               | -5.995242608  | -3.035134293 | 0.000000000 |
| 1            | 1.019279000   | -4.066711000 | 0.000000000 | 6               | -9.619956634  | 2.012475092  | 0.000000000 |
| 1            | 3.403492000   | -4.066493000 | 0.000000000 | 6               | -10.395469674 | 0.866020868  | 0.000000000 |
| 1            | 1.019279000   | 4.066711000  | 0.000000000 | 6               | -10.400491085 | -0.649701267 | 0.000000000 |
| 1            | 3.403492000   | 4.066493000  | 0.000000000 | 6               | -11.816317599 | 0.859574866  | 0.000000000 |
| 6            | 5.939951000   | 3.104196000  | 0.000000000 | 6               | -11.821253094 | -0.630705624 | 0.000000000 |
| 6            | 5.160910000   | 1.909439000  | 0.000000000 | 6               | -12.582676090 | -1.767800681 | 0.000000000 |
| 6            | 7.325328000   | 3.105018000  | 0.000000000 | 6               | -11.835732956 | -2.969510194 | 0.000000000 |
| 6            | 5.927636000   | 0.756608000  | 0.000000000 | 6               | -10.455498507 | -3.006200062 | 0.000000000 |
| 6            | 8.106587000   | 1.912341000  | 0.000000000 | 6               | -9.657873491  | -1.818316624 | 0.000000000 |
| 6            | 7.342816000   | 0.757665000  | 0.000000000 | 6               | -10.431360484 | 3.195146674  | 0.000000000 |
| 6            | 5.160910000   | -1.909439000 | 0.000000000 | 6               | -11.812815524 | 3.219929462  | 0.000000000 |
| 6            | 5.939951000   | -3.104196000 | 0.000000000 | 6               | -12.548457725 | 2.015432437  | 0.000000000 |
| 6            | 5.927636000   | -0.756608000 | 0.000000000 | 35              | -14.440662520 | 2.050163500  | 0.000000000 |
| 6            | 7.325328000   | -3.105018000 | 0.000000000 | 1               | -12.312151960 | 4.181187703  | 0.000000000 |
| 6            | 7.342816000   | -0.757665000 | 0.000000000 | 9               | -9.837016486  | 4.410153861  | 0.000000000 |
| 6            | 8.106587000   | -1.912341000 | 0.000000000 | 1               | -7.801827758  | 4.152039369  | 0.000000000 |
| 1            | 5.439546000   | -4.066599000 | 0.000000000 | 9               | -5.373970470  | 4.353503771  | 0.000000000 |
| 1            | 7.824028000   | -4.068279000 | 0.000000000 | 1               | -3.355346755  | 4.101135699  | 0.000000000 |
| 1            | 5.439546000   | 4.066599000  | 0.000000000 | 9               | -0.927849696  | 4.307478435  | 0.000000000 |
| 1            | 7.824028000   | 4.068279000  | 0.000000000 | 1               | 1.094192574   | 4.056168332  | 0.000000000 |
| 6            | -7.325328000  | 3.105018000  | 0.000000000 | 9               | 3.521274564   | 4.263168957  | 0.000000000 |
| 1            | -7.824028000  | 4.068279000  | 0.000000000 | 1               | 5.539268275   | 4.011473618  | 0.000000000 |
| 6            | 11.752031000  | 3.110078000  | 0.000000000 | 9               | 7.969039011   | 4.222281922  | 0.000000000 |
| 6            | 12.503540000  | 1.907498000  | 0.000000000 | 1               | 9.998790699   | 3.982748761  | 0.000000000 |
| 6            | 11.759542000  | 0.753612000  | 0.000000000 | 9               | 12.503267831  | 4.133439119  | 0.000000000 |
| 6            | 10.340436000  | 0.756486000  | 0.000000000 | 35              | 14.467922420  | 1.794936697  | 0.000000000 |
| 6            | 10.363746000  | 3.112566000  | 0.000000000 | 35              | 14.440662520  | -2.050163500 | 0.000000000 |
| 6            | 9.584802000   | 1.914560000  | 0.000000000 | 1               | 12.312151960  | -4.181187703 | 0.000000000 |
| 6            | 12.503540000  | -1.907498000 | 0.000000000 | 9               | 9.837016486   | -4.410153861 | 0.000000000 |
| 6            | 11.759542000  | -0.753612000 | 0.000000000 | 1               | 7.801827758   | -4.152039369 | 0.000000000 |
| 6            | 9.584802000   | -1.914560000 | 0.000000000 | 9               | 5.373970470   | -4.353503771 | 0.000000000 |
| 6            | 10.363746000  | -3.112566000 | 0.000000000 | 1               | 3.355346755   | -4.101135699 | 0.000000000 |
| 6            | 11.752031000  | -3.110078000 | 0.000000000 | 9               | 0.927849696   | -4.307478435 | 0.000000000 |
| 6            | 10.340436000  | -0.756486000 | 0.000000000 | 1               | -1.094192574  | -4.056168332 | 0.000000000 |
| 1            | 9.860598000   | -4.073576000 | 0.000000000 | 9               | -3.521274564  | -4.263168957 | 0.000000000 |
| 1            | 12.276311000  | -4.061934000 | 0.000000000 | 1               | -5.539268275  | -4.011473618 | 0.000000000 |
| 1            | 12.276311000  | 4.061934000  | 0.000000000 | 9               | -7.969039011  | -4.222281922 | 0.000000000 |
| 1            | 9.860598000   | 4.073576000  | 0.000000000 | 1               | -9.998790699  | -3.982748761 | 0.000000000 |
| 1            | 13.589204000  | 1.923301000  | 0.000000000 | 9               | -12.503267831 | -4.133439119 | 0.000000000 |
| 1            | 13.589204000  | -1.923301000 | 0.000000000 | 35              | -14.467922420 | -1.794936697 | 0.000000000 |
| <b>7Bp_H</b> |               |              |             | <b>7Bp_F_Br</b> |               |              |             |
| 6            | -12.575101000 | 3.113113000  | 0.000000000 | 6               | -14.804951740 | -1.777822805 | 0.000000000 |
| 6            | -10.317191000 | 1.912603000  | 0.000000000 | 6               | -14.055135166 | -2.977787571 | 0.000000000 |
| 6            | -11.795661000 | 1.915058000  | 0.000000000 | 6               | -12.674915343 | -3.011283954 | 0.000000000 |

|   |               |              |             |    |               |              |             |
|---|---------------|--------------|-------------|----|---------------|--------------|-------------|
| 6 | -12.551251000 | 0.756471000  | 0.000000000 | 6  | -11.879957380 | -1.821510008 | 0.000000000 |
| 6 | -13.970684000 | 0.753678000  | 0.000000000 | 6  | -12.625343934 | -0.654728822 | 0.000000000 |
| 6 | -13.963293000 | 3.110123000  | 0.000000000 | 6  | -14.046235166 | -0.638984876 | 0.000000000 |
| 6 | -8.149817000  | 3.103643000  | 0.000000000 | 6  | -14.044659900 | 0.851337788  | 0.000000000 |
| 6 | -9.553391000  | 0.757456000  | 0.000000000 | 6  | -12.623849866 | 0.861106487  | 0.000000000 |
| 6 | -7.371544000  | 1.908436000  | 0.000000000 | 6  | -10.401519859 | -1.829894422 | 0.000000000 |
| 6 | -8.138347000  | 0.756565000  | 0.000000000 | 6  | -9.612785789  | -0.686323033 | 0.000000000 |
| 6 | -14.714517000 | 1.907419000  | 0.000000000 | 6  | -9.613731824  | 0.829253637  | 0.000000000 |
| 1 | -15.800117000 | 1.923058000  | 0.000000000 | 6  | -10.372658032 | 1.992042412  | 0.000000000 |
| 6 | -11.795661000 | -1.915058000 | 0.000000000 | 6  | -11.850879455 | 2.009361418  | 0.000000000 |
| 6 | -12.551251000 | -0.756471000 | 0.000000000 | 6  | -14.779557811 | 2.005467389  | 0.000000000 |
| 6 | -14.714517000 | -1.907419000 | 0.000000000 | 6  | -14.046727428 | 3.211679764  | 0.000000000 |
| 6 | -13.963293000 | -3.110123000 | 0.000000000 | 6  | -12.665165987 | 3.190036861  | 0.000000000 |
| 6 | -12.575101000 | -3.113113000 | 0.000000000 | 9  | -12.073624816 | 4.406441512  | 0.000000000 |
| 6 | -10.317191000 | -1.912603000 | 0.000000000 | 1  | -14.548269186 | 4.171866857  | 0.000000000 |
| 6 | -9.535245000  | -3.105415000 | 0.000000000 | 35 | -16.671692538 | 2.035749545  | 0.000000000 |
| 6 | -9.553391000  | -0.757456000 | 0.000000000 | 35 | -16.690139830 | -1.809522413 | 0.000000000 |
| 6 | -8.149817000  | -3.103643000 | 0.000000000 | 9  | -14.719945334 | -4.143244089 | 0.000000000 |
| 6 | -8.138347000  | -0.756565000 | 0.000000000 | 1  | -12.216201576 | -3.987003563 | 0.000000000 |
| 6 | -7.371544000  | -1.908436000 | 0.000000000 | 6  | -9.592419164  | -3.003235648 | 0.000000000 |
| 6 | -13.970684000 | -0.753678000 | 0.000000000 | 6  | -8.214506442  | -3.029993135 | 0.000000000 |
| 1 | -15.800117000 | -1.923058000 | 0.000000000 | 6  | -7.429585418  | -1.842699410 | 0.000000000 |
| 1 | -14.487695000 | -4.061862000 | 0.000000000 | 6  | -8.195724239  | -0.685499537 | 0.000000000 |
| 1 | -12.071655000 | -4.074122000 | 0.000000000 | 6  | -8.196498378  | 0.826542126  | 0.000000000 |
| 1 | -10.034056000 | -4.068828000 | 0.000000000 | 6  | -9.583339833  | 3.175500513  | 0.000000000 |
| 1 | -7.649258000  | -4.065964000 | 0.000000000 | 6  | -8.205518365  | 3.142723981  | 0.000000000 |
| 6 | -3.729773000  | 3.103178000  | 0.000000000 | 6  | -7.401261648  | 1.964256622  | 0.000000000 |
| 6 | -2.949147000  | 1.908738000  | 0.000000000 | 6  | -5.952412726  | -1.857383210 | 0.000000000 |
| 6 | -3.715031000  | 0.756369000  | 0.000000000 | 6  | -5.158806726  | -0.719532054 | 0.000000000 |
| 6 | -5.129340000  | 0.756329000  | 0.000000000 | 6  | -5.159873639  | 0.791810673  | 0.000000000 |
| 6 | -5.115297000  | 3.102780000  | 0.000000000 | 6  | -5.923852081  | 1.949366238  | 0.000000000 |
| 6 | -5.895514000  | 1.908208000  | 0.000000000 | 6  | -5.144873668  | -3.034007079 | 0.000000000 |
| 6 | -2.949147000  | -1.908738000 | 0.000000000 | 6  | -3.766890851  | -3.063917787 | 0.000000000 |
| 6 | -3.715031000  | -0.756369000 | 0.000000000 | 6  | -2.978211186  | -1.878641981 | 0.000000000 |
| 6 | -5.895514000  | -1.908208000 | 0.000000000 | 6  | -3.741929248  | -0.720752429 | 0.000000000 |
| 6 | -5.115297000  | -3.102780000 | 0.000000000 | 6  | -3.742853178  | 0.790827239  | 0.000000000 |
| 6 | -3.729773000  | -3.103178000 | 0.000000000 | 6  | -5.135147531  | 3.134982897  | 0.000000000 |
| 6 | -5.129340000  | -0.756329000 | 0.000000000 | 6  | -3.757194643  | 3.105305207  | 0.000000000 |
| 1 | -5.614668000  | -4.065756000 | 0.000000000 | 6  | -2.949573365  | 1.929015071  | 0.000000000 |
| 1 | -3.230383000  | -4.066296000 | 0.000000000 | 6  | -1.501232602  | -1.893541269 | 0.000000000 |
| 1 | -12.071655000 | 4.074122000  | 0.000000000 | 6  | -0.707966713  | -0.755256426 | 0.000000000 |
| 1 | -14.487695000 | 4.061862000  | 0.000000000 | 6  | -0.708856872  | 0.756470753  | 0.000000000 |
| 1 | -7.649258000  | 4.065964000  | 0.000000000 | 6  | -1.472524862  | 1.914459451  | 0.000000000 |
| 1 | -3.230383000  | 4.066296000  | 0.000000000 | 9  | -3.163799496  | 4.323668191  | 0.000000000 |
| 1 | -5.614668000  | 4.065756000  | 0.000000000 | 1  | -5.589677236  | 4.112031406  | 0.000000000 |
| 6 | -0.692802000  | 3.103416000  | 0.000000000 | 9  | -7.610289036  | 4.359953210  | 0.000000000 |
| 6 | -1.473151000  | 1.908803000  | 0.000000000 | 1  | -10.037014171 | 4.153309098  | 0.000000000 |
| 6 | 0.692802000   | 3.103416000  | 0.000000000 | 9  | -10.185536765 | -4.221553530 | 0.000000000 |
| 6 | -0.707133000  | 0.756422000  | 0.000000000 | 1  | -7.756842653  | -4.005590906 | 0.000000000 |
| 6 | 1.473151000   | 1.908803000  | 0.000000000 | 9  | -5.737599345  | -4.252707980 | 0.000000000 |
| 6 | 0.707133000   | 0.756422000  | 0.000000000 | 1  | -3.311860508  | -4.040850405 | 0.000000000 |
| 6 | -1.473151000  | -1.908803000 | 0.000000000 | 6  | -0.693941497  | -3.070073338 | 0.000000000 |
| 6 | -0.692802000  | -3.103416000 | 0.000000000 | 6  | 0.684077884   | -3.100005609 | 0.000000000 |
| 6 | -0.707133000  | -0.756422000 | 0.000000000 | 6  | 1.472524862   | -1.914459451 | 0.000000000 |
| 6 | 0.692802000   | -3.103416000 | 0.000000000 | 6  | 0.708856872   | -0.756470753 | 0.000000000 |
| 6 | 0.707133000   | -0.756422000 | 0.000000000 | 6  | 0.707966713   | 0.755256426  | 0.000000000 |
| 6 | 1.473151000   | -1.908803000 | 0.000000000 | 6  | -0.684077884  | 3.100005609  | 0.000000000 |
| 1 | -1.192387000  | -4.066425000 | 0.000000000 | 6  | 0.693941497   | 3.070073338  | 0.000000000 |
| 1 | 1.192387000   | -4.066425000 | 0.000000000 | 6  | 1.501232602   | 1.893541269  | 0.000000000 |
| 1 | -1.192387000  | 4.066425000  | 0.000000000 | 1  | -1.139304291  | 4.076853496  | 0.000000000 |
| 1 | 1.192387000   | 4.066425000  | 0.000000000 | 9  | 1.287703487   | 4.288245011  | 0.000000000 |
| 6 | 3.729773000   | 3.103178000  | 0.000000000 | 9  | -1.287703487  | -4.288245011 | 0.000000000 |
| 6 | 2.949147000   | 1.908738000  | 0.000000000 | 1  | 1.139304291   | -4.076853496 | 0.000000000 |
| 6 | 5.115297000   | 3.102780000  | 0.000000000 | 6  | 2.949573365   | -1.929015071 | 0.000000000 |
| 6 | 3.715031000   | 0.756369000  | 0.000000000 | 6  | 3.742853178   | -0.790827239 | 0.000000000 |
| 6 | 5.895514000   | 1.908208000  | 0.000000000 | 6  | 3.741929248   | 0.720752429  | 0.000000000 |
| 6 | 5.129340000   | 0.756329000  | 0.000000000 | 6  | 2.978211186   | 1.878641981  | 0.000000000 |
| 6 | 2.949147000   | -1.908738000 | 0.000000000 | 6  | 3.766890851   | 3.063917787  | 0.000000000 |
| 6 | 3.729773000   | -3.103178000 | 0.000000000 | 6  | 5.144873668   | 3.034007079  | 0.000000000 |
| 6 | 3.715031000   | -0.756369000 | 0.000000000 | 6  | 5.952412726   | 1.857383210  | 0.000000000 |
| 6 | 5.115297000   | -3.102780000 | 0.000000000 | 6  | 5.158806726   | 0.719532054  | 0.000000000 |
| 6 | 5.129340000   | -0.756329000 | 0.000000000 | 6  | 5.159873639   | -0.791810673 | 0.000000000 |
| 6 | 5.895514000   | -1.908208000 | 0.000000000 | 6  | 3.757194643   | -3.105305207 | 0.000000000 |
| 1 | 3.230383000   | -4.066296000 | 0.000000000 | 6  | 5.135147531   | -3.134982897 | 0.000000000 |

|                 |               |              |             |
|-----------------|---------------|--------------|-------------|
| 1               | 5.614668000   | -4.065756000 | 0.000000000 |
| 1               | 3.230383000   | 4.066296000  | 0.000000000 |
| 1               | 5.614668000   | 4.065756000  | 0.000000000 |
| 6               | -9.535245000  | 3.105415000  | 0.000000000 |
| 1               | -10.034056000 | 4.068828000  | 0.000000000 |
| 6               | 9.535245000   | 3.105415000  | 0.000000000 |
| 6               | 11.795661000  | 1.915058000  | 0.000000000 |
| 6               | 10.317191000  | 1.912603000  | 0.000000000 |
| 6               | 9.553391000   | 0.757456000  | 0.000000000 |
| 6               | 8.138347000   | 0.756565000  | 0.000000000 |
| 6               | 8.149817000   | 3.103643000  | 0.000000000 |
| 6               | 13.963293000  | 3.110123000  | 0.000000000 |
| 6               | 12.551251000  | 0.756471000  | 0.000000000 |
| 6               | 14.714517000  | 1.907419000  | 0.000000000 |
| 6               | 13.970684000  | 0.753678000  | 0.000000000 |
| 6               | 7.371544000   | 1.908436000  | 0.000000000 |
| 6               | 10.317191000  | -1.912603000 | 0.000000000 |
| 6               | 9.553391000   | -0.757456000 | 0.000000000 |
| 6               | 7.371544000   | -1.908436000 | 0.000000000 |
| 6               | 8.149817000   | -3.103643000 | 0.000000000 |
| 6               | 9.535245000   | -3.105415000 | 0.000000000 |
| 6               | 11.795661000  | -1.915058000 | 0.000000000 |
| 6               | 12.575101000  | -3.113113000 | 0.000000000 |
| 6               | 12.551251000  | -0.756471000 | 0.000000000 |
| 6               | 13.963293000  | -3.110123000 | 0.000000000 |
| 6               | 13.970684000  | -0.753678000 | 0.000000000 |
| 6               | 14.714517000  | -1.907419000 | 0.000000000 |
| 6               | 8.138347000   | -0.756565000 | 0.000000000 |
| 1               | 7.649258000   | -4.065964000 | 0.000000000 |
| 1               | 10.034056000  | -4.068828000 | 0.000000000 |
| 1               | 12.071655000  | -4.074122000 | 0.000000000 |
| 1               | 14.487695000  | -4.061862000 | 0.000000000 |
| 1               | 10.034056000  | 4.068828000  | 0.000000000 |
| 1               | 7.649258000   | 4.065964000  | 0.000000000 |
| 1               | 14.487695000  | 4.061862000  | 0.000000000 |
| 6               | 12.575101000  | 3.113113000  | 0.000000000 |
| 1               | 12.071655000  | 4.074122000  | 0.000000000 |
| 1               | 15.800117000  | 1.923058000  | 0.000000000 |
| 1               | 15.800117000  | -1.923058000 | 0.000000000 |
| 6               | 5.923852081   | -1.949366238 | 0.000000000 |
| 9               | 3.163799496   | -4.323668191 | 0.000000000 |
| 1               | 5.589677236   | -4.112031406 | 0.000000000 |
| 6               | 7.401261648   | -1.964256622 | 0.000000000 |
| 6               | 8.196498378   | -0.826542126 | 0.000000000 |
| 6               | 8.195724239   | 0.685499537  | 0.000000000 |
| 6               | 7.429585418   | 1.842699410  | 0.000000000 |
| 6               | 8.214506442   | 3.029993135  | 0.000000000 |
| 6               | 9.592419164   | 3.003235648  | 0.000000000 |
| 6               | 10.401519859  | 1.829894422  | 0.000000000 |
| 6               | 9.612785789   | 0.686323033  | 0.000000000 |
| 6               | 9.613731824   | -0.829253637 | 0.000000000 |
| 6               | 8.205518365   | -3.142723981 | 0.000000000 |
| 6               | 9.583339833   | -3.175500513 | 0.000000000 |
| 6               | 10.372658032  | -1.992042412 | 0.000000000 |
| 9               | 7.610289036   | -4.359953210 | 0.000000000 |
| 1               | 10.037014171  | -4.153309098 | 0.000000000 |
| 6               | 11.850879455  | -2.009361418 | 0.000000000 |
| 6               | 12.623849866  | -0.861106487 | 0.000000000 |
| 6               | 12.625343934  | 0.654728822  | 0.000000000 |
| 6               | 11.879957380  | 1.821510008  | 0.000000000 |
| 6               | 14.044659900  | -0.851337788 | 0.000000000 |
| 6               | 14.046235166  | 0.638984876  | 0.000000000 |
| 6               | 12.665165987  | -3.190036861 | 0.000000000 |
| 6               | 14.046727428  | -3.211679764 | 0.000000000 |
| 6               | 14.779557811  | -2.005467389 | 0.000000000 |
| 35              | 16.671692538  | -2.035749545 | 0.000000000 |
| 1               | 14.548269186  | -4.171866857 | 0.000000000 |
| 9               | 12.073624816  | -4.406441512 | 0.000000000 |
| 6               | 14.804951740  | 1.777822805  | 0.000000000 |
| 6               | 14.055135166  | 2.977787571  | 0.000000000 |
| 6               | 12.674915343  | 3.011283954  | 0.000000000 |
| 1               | 12.216201576  | 3.987003563  | 0.000000000 |
| 9               | 14.719945334  | 4.143244089  | 0.000000000 |
| 35              | 16.690139830  | 1.809522413  | 0.000000000 |
| 1               | 7.756842653   | 4.005590906  | 0.000000000 |
| 9               | 10.185536765  | 4.221553530  | 0.000000000 |
| 9               | 5.737599345   | 4.252707980  | 0.000000000 |
| 1               | 3.311860508   | 4.040850405  | 0.000000000 |
| <b>8Bp_H</b>    |               |              |             |
| 6               | -14.785697000 | 3.112537000  | 0.000000000 |
| 6               | -12.528545000 | 1.911854000  | 0.000000000 |
| 6               | -14.006778000 | 1.914270000  | 0.000000000 |
| 6               | -14.762482000 | 0.756357000  | 0.000000000 |
| 6               | -16.181677000 | 0.753585000  | 0.000000000 |
| 6               | -16.173915000 | 3.110079000  | 0.000000000 |
| 6               | -10.361623000 | 3.103701000  | 0.000000000 |
| 6               | -11.764657000 | 0.757402000  | 0.000000000 |
| 6               | -9.582954000  | 1.908479000  | 0.000000000 |
| 6               | -10.349808000 | 0.756431000  | 0.000000000 |
| 6               | -16.925539000 | 1.907417000  | 0.000000000 |
| 1               | -18.011200000 | 1.923423000  | 0.000000000 |
| 6               | -14.006778000 | -1.914270000 | 0.000000000 |
| 6               | -14.762482000 | -0.756357000 | 0.000000000 |
| 6               | -16.925539000 | -1.907417000 | 0.000000000 |
| 6               | -16.173915000 | -3.110079000 | 0.000000000 |
| 6               | -14.785697000 | -3.112537000 | 0.000000000 |
| 6               | -12.528545000 | -1.911854000 | 0.000000000 |
| 6               | -11.747084000 | -3.104847000 | 0.000000000 |
| 6               | -11.764657000 | -0.757402000 | 0.000000000 |
| 6               | -10.361623000 | -3.103701000 | 0.000000000 |
| 6               | -10.349808000 | -0.756431000 | 0.000000000 |
| 6               | -9.582954000  | -1.908479000 | 0.000000000 |
| 6               | -16.181677000 | -0.753585000 | 0.000000000 |
| 1               | -18.011200000 | -1.923423000 | 0.000000000 |
| 1               | -16.698266000 | -4.061928000 | 0.000000000 |
| 1               | -14.282304000 | -4.073496000 | 0.000000000 |
| 1               | -12.245855000 | -4.068195000 | 0.000000000 |
| 1               | -9.861119000  | -4.066143000 | 0.000000000 |
| 6               | -5.940940000  | 3.103468000  | 0.000000000 |
| 6               | -5.160288000  | 1.909092000  | 0.000000000 |
| 6               | -5.926022000  | 0.756473000  | 0.000000000 |
| 6               | -7.340563000  | 0.756376000  | 0.000000000 |
| 6               | -7.326415000  | 3.103118000  | 0.000000000 |
| 6               | -17.027340148 | -1.786405889 | 0.000000000 |
| 6               | -16.275590099 | -2.985050536 | 0.000000000 |
| 6               | -14.895287639 | -3.016371137 | 0.000000000 |
| 6               | -14.102333455 | -1.825345407 | 0.000000000 |
| 6               | -14.849599472 | -0.659687839 | 0.000000000 |
| 6               | -16.270427046 | -0.646267184 | 0.000000000 |
| 35              | -18.912506956 | -1.821576873 | 0.000000000 |
| 6               | -16.271243489 | 0.844058133  | 0.000000000 |
| 6               | -14.850417045 | 0.856114032  | 0.000000000 |
| 6               | -14.079368053 | 2.005655350  | 0.000000000 |
| 6               | -14.895633031 | 3.184980152  | 0.000000000 |
| 6               | -16.277201384 | 3.204412789  | 0.000000000 |
| 6               | -17.008006898 | 1.996949636  | 0.000000000 |
| 6               | -12.623904638 | -1.831131184 | 0.000000000 |
| 6               | -11.837087689 | -0.686228246 | 0.000000000 |
| 6               | -11.840291078 | 0.829304246  | 0.000000000 |
| 6               | -12.601081112 | 1.990881309  | 0.000000000 |
| 6               | -10.420036698 | -0.683236812 | 0.000000000 |
| 6               | -10.423044252 | 0.828758322  | 0.000000000 |
| 6               | -9.652093953  | -1.839232605 | 0.000000000 |
| 6               | -10.435079824 | -3.027800574 | 0.000000000 |
| 6               | -11.812971999 | -3.003161904 | 0.000000000 |
| 6               | -8.174953664  | -1.851507081 | 0.000000000 |
| 6               | -7.383144629  | -0.712408965 | 0.000000000 |
| 6               | -7.386390802  | 0.798881716  | 0.000000000 |
| 6               | -8.152125883  | 1.955277058  | 0.000000000 |
| 6               | -9.629601861  | 1.967752737  | 0.000000000 |
| 6               | -5.966290847  | -0.711586286 | 0.000000000 |
| 6               | -5.969347538  | 0.799930159  | 0.000000000 |
| 6               | -7.365729062  | -3.026896685 | 0.000000000 |
| 6               | -5.987745367  | -3.054815025 | 0.000000000 |
| 6               | -5.200849171  | -1.868347714 | 0.000000000 |
| 6               | -3.723894328  | -1.880994983 | 0.000000000 |
| 6               | -2.932281036  | -0.741551578 | 0.000000000 |
| <b>8Bp_F_Br</b> |               |              |             |

|   |               |              |             |    |               |              |             |
|---|---------------|--------------|-------------|----|---------------|--------------|-------------|
| 6 | -8.106748000  | 1.908520000  | 0.000000000 | 6  | -2.935268686  | 0.770123418  | 0.000000000 |
| 6 | -5.160288000  | -1.909092000 | 0.000000000 | 6  | -3.700663662  | 1.926991543  | 0.000000000 |
| 6 | -5.926022000  | -0.756473000 | 0.000000000 | 6  | -5.177765782  | 1.939291769  | 0.000000000 |
| 6 | -8.106748000  | -1.908520000 | 0.000000000 | 6  | -1.515473006  | -0.740843601 | 0.000000000 |
| 6 | -7.326415000  | -3.103118000 | 0.000000000 | 6  | -1.518415284  | 0.770888099  | 0.000000000 |
| 6 | -5.940940000  | -3.103468000 | 0.000000000 | 6  | -0.750186800  | -1.897829016 | 0.000000000 |
| 6 | -7.340563000  | -0.756376000 | 0.000000000 | 6  | -1.537019006  | -3.084450749 | 0.000000000 |
| 1 | -7.825963000  | -4.066041000 | 0.000000000 | 6  | -2.915032686  | -3.056377210 | 0.000000000 |
| 1 | -5.441545000  | -4.066540000 | 0.000000000 | 6  | 0.726846637   | -1.910385798 | 0.000000000 |
| 1 | -14.282304000 | 4.073496000  | 0.000000000 | 6  | 1.518415284   | -0.770888099 | 0.000000000 |
| 1 | -16.698266000 | 4.061928000  | 0.000000000 | 6  | 1.515473006   | 0.740843601  | 0.000000000 |
| 1 | -9.861119000  | 4.066143000  | 0.000000000 | 6  | 0.750186800   | 1.897829016  | 0.000000000 |
| 1 | -5.441545000  | 4.066540000  | 0.000000000 | 6  | -0.726846637  | 1.910385798  | 0.000000000 |
| 1 | -7.825963000  | 4.066041000  | 0.000000000 | 6  | 2.935268686   | -0.770123418 | 0.000000000 |
| 6 | -2.903792000  | 3.103610000  | 0.000000000 | 6  | 2.932281036   | 0.741551578  | 0.000000000 |
| 6 | -3.684228000  | 1.909102000  | 0.000000000 | 6  | 1.535886728   | -3.085700192 | 0.000000000 |
| 6 | -1.518313000  | 3.103547000  | 0.000000000 | 6  | 2.913929845   | -3.113706923 | 0.000000000 |
| 6 | -2.918331000  | 0.756498000  | 0.000000000 | 6  | 3.700663662   | -1.926991543 | 0.000000000 |
| 6 | -0.737999000  | 1.909005000  | 0.000000000 | 6  | 5.177765782   | -1.939291769 | 0.000000000 |
| 6 | -1.503874000  | 0.756510000  | 0.000000000 | 6  | 5.987136477   | -3.114362323 | 0.000000000 |
| 6 | -3.684228000  | -1.909102000 | 0.000000000 | 6  | 7.365134475   | -3.142081753 | 0.000000000 |
| 6 | -2.903792000  | -3.103610000 | 0.000000000 | 6  | 8.152125883   | -1.955277058 | 0.000000000 |
| 6 | -2.918331000  | -0.756498000 | 0.000000000 | 6  | 7.386390802   | -0.798881716 | 0.000000000 |
| 6 | -1.518313000  | -3.103547000 | 0.000000000 | 6  | 5.969347538   | -0.799930159 | 0.000000000 |
| 6 | -1.503874000  | -0.756510000 | 0.000000000 | 6  | 9.629601861   | -1.967752737 | 0.000000000 |
| 6 | -0.737999000  | -1.909005000 | 0.000000000 | 6  | 10.435697812  | -3.144910886 | 0.000000000 |
| 1 | -3.403426000  | -4.066549000 | 0.000000000 | 6  | 11.813579431  | -3.175588617 | 0.000000000 |
| 1 | -1.018740000  | -4.066489000 | 0.000000000 | 6  | 12.601081112  | -1.990881309 | 0.000000000 |
| 1 | -3.403426000  | 4.066549000  | 0.000000000 | 6  | 11.840291078  | -0.829304246 | 0.000000000 |
| 1 | -1.018740000  | 4.066489000  | 0.000000000 | 6  | 10.423044252  | -0.828758322 | 0.000000000 |
| 6 | 1.518313000   | 3.103547000  | 0.000000000 | 6  | 14.079368053  | -2.005655350 | 0.000000000 |
| 6 | 0.737999000   | 1.909005000  | 0.000000000 | 6  | 14.895633031  | -3.184980152 | 0.000000000 |
| 6 | 2.903792000   | 3.103610000  | 0.000000000 | 6  | 16.277201384  | -3.204412789 | 0.000000000 |
| 6 | 1.503874000   | 0.756510000  | 0.000000000 | 6  | 17.008006898  | -1.996949636 | 0.000000000 |
| 6 | 3.684228000   | 1.909102000  | 0.000000000 | 6  | 16.271243489  | -0.844058133 | 0.000000000 |
| 6 | 2.918331000   | 0.756498000  | 0.000000000 | 6  | 14.850417045  | -0.856114032 | 0.000000000 |
| 6 | 0.737999000   | -1.909005000 | 0.000000000 | 35 | 18.900249981  | -2.023592328 | 0.000000000 |
| 6 | 1.518313000   | -3.103547000 | 0.000000000 | 1  | 16.780373489  | -4.163760127 | 0.000000000 |
| 6 | 1.503874000   | -0.756510000 | 0.000000000 | 9  | 14.306099164  | -4.402272840 | 0.000000000 |
| 6 | 2.903792000   | -3.103610000 | 0.000000000 | 1  | 12.268766415  | -4.152660034 | 0.000000000 |
| 6 | 2.918331000   | -0.756498000 | 0.000000000 | 9  | 9.842313866   | -4.362966373 | 0.000000000 |
| 6 | 3.684228000   | -1.909102000 | 0.000000000 | 1  | 7.821098060   | -4.118453241 | 0.000000000 |
| 1 | 1.018740000   | -4.066489000 | 0.000000000 | 9  | 5.395475472   | -4.333501118 | 0.000000000 |
| 1 | 3.403426000   | -4.066549000 | 0.000000000 | 1  | 3.370564686   | -4.089888804 | 0.000000000 |
| 1 | 1.018740000   | 4.066489000  | 0.000000000 | 9  | 0.943890752   | -4.304680789 | 0.000000000 |
| 1 | 3.403426000   | 4.066549000  | 0.000000000 | 1  | -1.080426230  | -4.060642355 | 0.000000000 |
| 6 | -11.747084000 | 3.104847000  | 0.000000000 | 9  | -3.507132273  | -4.275298127 | 0.000000000 |
| 1 | -12.245855000 | 4.068195000  | 0.000000000 | 1  | -5.531252850  | -4.031045975 | 0.000000000 |
| 6 | 7.326415000   | 3.103118000  | 0.000000000 | 9  | -7.956701315  | -4.246380999 | 0.000000000 |
| 6 | 9.582954000   | 1.908479000  | 0.000000000 | 1  | -9.975822118  | -4.002637606 | 0.000000000 |
| 6 | 8.106748000   | 1.908520000  | 0.000000000 | 9  | -12.404180131 | -4.222321665 | 0.000000000 |
| 6 | 7.340563000   | 0.756376000  | 0.000000000 | 1  | -14.435077824 | -3.991347408 | 0.000000000 |
| 6 | 5.926022000   | 0.756473000  | 0.000000000 | 9  | -16.938400481 | -4.151647178 | 0.000000000 |
| 6 | 5.940940000   | 3.103468000  | 0.000000000 | 35 | -18.900249981 | 2.023592328  | 0.000000000 |
| 6 | 11.747084000  | 3.104847000  | 0.000000000 | 1  | -16.780373489 | 4.163760127  | 0.000000000 |
| 6 | 10.349808000  | 0.756431000  | 0.000000000 | 9  | -14.306099164 | 4.402272840  | 0.000000000 |
| 6 | 12.528545000  | 1.911854000  | 0.000000000 | 6  | -11.813579431 | 3.175588617  | 0.000000000 |
| 6 | 11.764657000  | 0.757402000  | 0.000000000 | 6  | -10.435697812 | 3.144910886  | 0.000000000 |
| 6 | 5.160288000   | 1.909092000  | 0.000000000 | 9  | -9.842313866  | 4.362966373  | 0.000000000 |
| 6 | 8.106748000   | -1.908520000 | 0.000000000 | 1  | -12.268766415 | 4.152660034  | 0.000000000 |
| 6 | 7.340563000   | -0.756376000 | 0.000000000 | 6  | -7.365134475  | 3.142081753  | 0.000000000 |
| 6 | 5.160288000   | -1.909092000 | 0.000000000 | 6  | -5.987136477  | 3.114362323  | 0.000000000 |
| 6 | 5.940940000   | -3.103468000 | 0.000000000 | 9  | -5.395475472  | 4.333501118  | 0.000000000 |
| 6 | 7.326415000   | -3.103118000 | 0.000000000 | 1  | -7.821098060  | 4.118453241  | 0.000000000 |
| 6 | 9.582954000   | -1.908479000 | 0.000000000 | 6  | -2.913929845  | 3.113706923  | 0.000000000 |
| 6 | 10.361623000  | -3.103701000 | 0.000000000 | 6  | -1.535886728  | 3.085700192  | 0.000000000 |
| 6 | 10.349808000  | -0.756431000 | 0.000000000 | 9  | -0.943890752  | 4.304680789  | 0.000000000 |
| 6 | 11.747084000  | -3.104847000 | 0.000000000 | 1  | -3.370564686  | 4.089888804  | 0.000000000 |
| 6 | 11.764657000  | -0.757402000 | 0.000000000 | 6  | 1.537019006   | 3.084450749  | 0.000000000 |
| 6 | 12.528545000  | -1.911854000 | 0.000000000 | 6  | 2.915032686   | 3.056377210  | 0.000000000 |
| 6 | 5.926022000   | -0.756473000 | 0.000000000 | 6  | 3.723894328   | 1.880994983  | 0.000000000 |
| 1 | 5.441545000   | -4.066540000 | 0.000000000 | 9  | 3.507132273   | 4.275298127  | 0.000000000 |
| 1 | 7.825963000   | -4.066041000 | 0.000000000 | 1  | 1.080426230   | 4.060642355  | 0.000000000 |
| 1 | 9.861119000   | -4.066143000 | 0.000000000 | 6  | 5.200849171   | 1.868347714  | 0.000000000 |



|              |               |              |             |                 |               |              |             |
|--------------|---------------|--------------|-------------|-----------------|---------------|--------------|-------------|
| 1            | 12.245855000  | -4.068195000 | 0.000000000 | 6               | 5.966290847   | 0.711586286  | 0.000000000 |
| 6            | 16.173915000  | 3.110079000  | 0.000000000 | 6               | 7.383144629   | 0.712408965  | 0.000000000 |
| 6            | 16.925539000  | 1.907417000  | 0.000000000 | 6               | 8.174953664   | 1.851507081  | 0.000000000 |
| 6            | 16.181677000  | 0.753585000  | 0.000000000 | 6               | 7.365729062   | 3.026896685  | 0.000000000 |
| 6            | 14.762482000  | 0.756357000  | 0.000000000 | 6               | 5.987745367   | 3.054815025  | 0.000000000 |
| 6            | 14.785697000  | 3.112537000  | 0.000000000 | 1               | 5.531252850   | 4.031045975  | 0.000000000 |
| 6            | 14.006778000  | 1.914270000  | 0.000000000 | 9               | 7.956701315   | 4.246380999  | 0.000000000 |
| 6            | 16.925539000  | -1.907417000 | 0.000000000 | 6               | 9.652093953   | 1.839232605  | 0.000000000 |
| 6            | 16.181677000  | -0.753585000 | 0.000000000 | 6               | 10.420036698  | 0.683236812  | 0.000000000 |
| 6            | 14.006778000  | -1.914270000 | 0.000000000 | 6               | 11.837087689  | 0.686228246  | 0.000000000 |
| 6            | 14.785697000  | -3.112537000 | 0.000000000 | 6               | 12.623904638  | 1.831131184  | 0.000000000 |
| 6            | 16.173915000  | -3.110079000 | 0.000000000 | 6               | 11.812971999  | 3.003161904  | 0.000000000 |
| 6            | 14.762482000  | -0.756357000 | 0.000000000 | 6               | 10.435079824  | 3.027800574  | 0.000000000 |
| 1            | 14.282304000  | -4.073496000 | 0.000000000 | 1               | 9.975822118   | 4.002637606  | 0.000000000 |
| 1            | 16.698266000  | -4.061928000 | 0.000000000 | 9               | 12.404180131  | 4.222321665  | 0.000000000 |
| 1            | 7.825963000   | 4.066041000  | 0.000000000 | 6               | 14.102333455  | 1.825345407  | 0.000000000 |
| 1            | 5.441545000   | 4.066540000  | 0.000000000 | 6               | 14.895287639  | 3.016371137  | 0.000000000 |
| 1            | 12.245855000  | 4.068195000  | 0.000000000 | 6               | 16.275590099  | 2.985050536  | 0.000000000 |
| 1            | 16.698266000  | 4.061928000  | 0.000000000 | 6               | 17.027340148  | 1.786405889  | 0.000000000 |
| 1            | 14.282304000  | 4.073496000  | 0.000000000 | 6               | 16.270427046  | 0.646267184  | 0.000000000 |
| 6            | 10.361623000  | 3.103701000  | 0.000000000 | 6               | 14.849599472  | 0.659687839  | 0.000000000 |
| 1            | 9.861119000   | 4.066143000  | 0.000000000 | 35              | 18.912506956  | 1.821576873  | 0.000000000 |
| 1            | 18.011200000  | 1.923423000  | 0.000000000 | 1               | 14.435077824  | 3.991347408  | 0.000000000 |
| 1            | 18.011200000  | -1.923423000 | 0.000000000 | 9               | 16.938400481  | 4.151647178  | 0.000000000 |
| <b>9Bp_H</b> |               |              |             | <b>9Bp_F_Br</b> |               |              |             |
| 6            | -16.996652000 | 3.112900000  | 0.000000000 | 6               | -17.117444985 | -3.021441373 | 0.000000000 |
| 6            | -14.739348000 | 1.912389000  | 0.000000000 | 6               | 16.307351562  | -2.001578822 | 0.000000000 |
| 6            | -16.217659000 | 1.914733000  | 0.000000000 | 6               | 19.250952405  | 1.793849284  | 0.000000000 |
| 6            | -16.973333000 | 0.756519000  | 0.000000000 | 6               | 18.497695790  | 2.991682367  | 0.000000000 |
| 6            | -18.392554000 | 0.753664000  | 0.000000000 | 6               | 17.117444985  | 3.021441373  | 0.000000000 |
| 6            | -18.384847000 | 3.110216000  | 0.000000000 | 6               | 16.325800867  | 1.829404814  | 0.000000000 |
| 6            | -12.572601000 | 3.104123000  | 0.000000000 | 6               | 17.074454309  | 0.664743441  | 0.000000000 |
| 6            | -13.975495000 | 0.757598000  | 0.000000000 | 6               | 18.495428676  | 0.652903720  | 0.000000000 |
| 6            | -11.793746000 | 1.909114000  | 0.000000000 | 6               | 14.847364470  | 1.833395005  | 0.000000000 |
| 6            | -12.560453000 | 0.756674000  | 0.000000000 | 6               | 14.034927645  | 3.004373323  | 0.000000000 |
| 6            | -19.136389000 | 1.907510000  | 0.000000000 | 6               | 12.657007679  | 3.027409444  | 0.000000000 |
| 1            | -20.222021000 | 1.923701000  | 0.000000000 | 6               | 11.875436639  | 1.837953186  | 0.000000000 |
| 6            | -16.217659000 | -1.914733000 | 0.000000000 | 6               | 12.644785748  | 0.682872913  | 0.000000000 |
| 6            | -16.973333000 | -0.756519000 | 0.000000000 | 6               | 14.061836749  | 0.687562570  | 0.000000000 |
| 6            | -19.136389000 | -1.907510000 | 0.000000000 | 6               | 14.066865472  | -0.827992063 | 0.000000000 |
| 6            | -18.384847000 | -3.110216000 | 0.000000000 | 6               | 12.649595002  | -0.829117663 | 0.000000000 |
| 6            | -16.996652000 | -3.112900000 | 0.000000000 | 6               | 11.857402819  | -1.968998119 | 0.000000000 |
| 6            | -14.739348000 | -1.912389000 | 0.000000000 | 6               | 12.664938556  | -3.145157758 | 0.000000000 |
| 6            | -13.957939000 | -3.105242000 | 0.000000000 | 6               | 14.042881206  | -3.174298050 | 0.000000000 |
| 6            | -13.975495000 | -0.757598000 | 0.000000000 | 6               | 14.829029514  | -1.988675066 | 0.000000000 |
| 6            | -12.572601000 | -3.104123000 | 0.000000000 | 6               | 17.077050783  | -0.851074912 | 0.000000000 |
| 6            | -12.560453000 | -0.756674000 | 0.000000000 | 6               | 18.497825790  | -0.837338433 | 0.000000000 |
| 6            | -11.793746000 | -1.909114000 | 0.000000000 | 6               | 19.236061062  | -1.989293341 | 0.000000000 |
| 6            | -18.392554000 | -0.753664000 | 0.000000000 | 6               | 18.506730974  | -3.197636137 | 0.000000000 |
| 1            | -20.222021000 | -1.923701000 | 0.000000000 | 6               | 17.125098689  | -3.179833852 | 0.000000000 |
| 1            | -18.909161000 | -4.062014000 | 0.000000000 | 35              | 21.128299311  | -2.013461287 | 0.000000000 |
| 1            | -16.493312000 | -4.073899000 | 0.000000000 | 1               | 19.011038864  | -4.156407829 | 0.000000000 |
| 1            | -14.456636000 | -4.068613000 | 0.000000000 | 9               | 16.537083345  | -4.397829280 | 0.000000000 |
| 1            | -12.072244000 | -4.066525000 | 0.000000000 | 9               | 12.072947850  | -4.363868753 | 0.000000000 |
| 6            | -8.151771000  | 3.103823000  | 0.000000000 | 1               | 14.498866339  | -4.151013775 | 0.000000000 |
| 6            | -7.371135000  | 1.909646000  | 0.000000000 | 35              | 21.136115730  | 1.831583824  | 0.000000000 |
| 6            | -8.136686000  | 0.756696000  | 0.000000000 | 9               | 19.159185839  | 4.158999417  | 0.000000000 |
| 6            | -9.551441000  | 0.756610000  | 0.000000000 | 1               | 16.656354725  | 3.995985757  | 0.000000000 |
| 6            | -9.537048000  | 3.103601000  | 0.000000000 | 9               | 14.624410145  | 4.224338966  | 0.000000000 |
| 6            | -10.317447000 | 1.909191000  | 0.000000000 | 1               | 12.196918870  | 4.001833181  | 0.000000000 |
| 6            | -7.371135000  | -1.909646000 | 0.000000000 | 6               | 10.398301510  | 1.848465410  | 0.000000000 |
| 6            | -8.136686000  | -0.756696000 | 0.000000000 | 6               | 9.607792706   | 0.708447144  | 0.000000000 |
| 6            | -10.317447000 | -1.909191000 | 0.000000000 | 6               | 9.612834204   | -0.802844502 | 0.000000000 |
| 6            | -9.537048000  | -3.103601000 | 0.000000000 | 6               | 10.379905315  | -1.958350212 | 0.000000000 |
| 6            | -8.151771000  | -3.103823000 | 0.000000000 | 6               | 8.190954890   | 0.705952522  | 0.000000000 |
| 6            | -9.551441000  | -0.756610000 | 0.000000000 | 6               | 8.195786421   | -0.805547153 | 0.000000000 |
| 1            | -10.036390000 | -4.066522000 | 0.000000000 | 6               | 7.405430715   | -1.945760131 | 0.000000000 |
| 1            | -7.652286000  | -4.066721000 | 0.000000000 | 6               | 5.928333725   | -1.935218083 | 0.000000000 |
| 1            | -16.493312000 | 4.073899000  | 0.000000000 | 6               | 5.161627860   | -0.779229062 | 0.000000000 |
| 1            | -18.909161000 | 4.062014000  | 0.000000000 | 6               | 5.156894074   | 0.732431161  | 0.000000000 |
| 1            | -12.072244000 | 4.066525000  | 0.000000000 | 6               | 5.947271142   | 1.872722041  | 0.000000000 |
| 1            | -7.652286000  | 4.066721000  | 0.000000000 | 6               | 7.424158390   | 1.861804962  | 0.000000000 |
| 1            | -10.036390000 | 4.066522000  | 0.000000000 | 6               | 3.740106111   | 0.730120310  | 0.000000000 |
| 6            | -5.114698000  | 3.104032000  | 0.000000000 | 6               | 3.744768642   | -0.781594583 | 0.000000000 |

|   |               |              |             |    |               |              |             |
|---|---------------|--------------|-------------|----|---------------|--------------|-------------|
| 6 | -5.895077000  | 1.909744000  | 0.000000000 | 6  | 2.973564972   | 1.886265568  | 0.000000000 |
| 6 | -3.729426000  | 3.104031000  | 0.000000000 | 6  | 1.496586985   | 1.897239069  | 0.000000000 |
| 6 | -5.129380000  | 0.756756000  | 0.000000000 | 6  | 0.706110030   | 0.756972652  | 0.000000000 |
| 6 | -2.949073000  | 1.909721000  | 0.000000000 | 6  | 0.710734496   | -0.754756065 | 0.000000000 |
| 6 | -3.714705000  | 0.756709000  | 0.000000000 | 6  | 1.477287528   | -1.910924378 | 0.000000000 |
| 6 | -5.895077000  | -1.909744000 | 0.000000000 | 6  | 2.954364459   | -1.921910338 | 0.000000000 |
| 6 | -5.114698000  | -3.104032000 | 0.000000000 | 6  | -0.710734496  | 0.754756065  | 0.000000000 |
| 6 | -5.129380000  | -0.756756000 | 0.000000000 | 6  | -0.706110030  | -0.756972652 | 0.000000000 |
| 6 | -3.729426000  | -3.104031000 | 0.000000000 | 6  | -1.477287528  | 1.910924378  | 0.000000000 |
| 6 | -3.714705000  | -0.756709000 | 0.000000000 | 6  | -2.954364459  | 1.921910338  | 0.000000000 |
| 6 | -2.949073000  | -1.909721000 | 0.000000000 | 6  | -3.744768642  | 0.781594583  | 0.000000000 |
| 1 | -5.614176000  | -4.066920000 | 0.000000000 | 6  | -3.740106111  | -0.730120310 | 0.000000000 |
| 1 | -3.229742000  | -4.066815000 | 0.000000000 | 6  | -2.973564972  | -1.886265568 | 0.000000000 |
| 1 | -5.614176000  | 4.066920000  | 0.000000000 | 6  | -1.496586985  | -1.897239069 | 0.000000000 |
| 1 | -3.229742000  | 4.066815000  | 0.000000000 | 6  | -5.161627860  | 0.779229062  | 0.000000000 |
| 6 | -0.692648000  | 3.103976000  | 0.000000000 | 6  | -5.156894074  | -0.732431161 | 0.000000000 |
| 6 | -1.473025000  | 1.909726000  | 0.000000000 | 6  | -5.928333725  | 1.935218083  | 0.000000000 |
| 6 | 0.692648000   | 3.103976000  | 0.000000000 | 6  | -7.405430715  | 1.945760131  | 0.000000000 |
| 6 | -0.707327000  | -0.756722000 | 0.000000000 | 6  | -8.195786421  | 0.805547153  | 0.000000000 |
| 6 | 1.473025000   | 1.909726000  | 0.000000000 | 6  | -8.190954890  | -0.705952522 | 0.000000000 |
| 6 | 0.707327000   | 0.756722000  | 0.000000000 | 6  | -7.424158390  | -1.861804962 | 0.000000000 |
| 6 | -1.473025000  | -1.909726000 | 0.000000000 | 6  | -5.947271142  | -1.872722041 | 0.000000000 |
| 6 | -0.692648000  | -3.103976000 | 0.000000000 | 6  | -9.612834204  | 0.802844502  | 0.000000000 |
| 6 | -0.707327000  | -0.756722000 | 0.000000000 | 6  | -9.607792706  | -0.708447144 | 0.000000000 |
| 6 | 0.692648000   | -3.103976000 | 0.000000000 | 6  | -10.379905315 | 1.958350212  | 0.000000000 |
| 6 | 0.707327000   | -0.756722000 | 0.000000000 | 6  | -11.857402819 | 1.968998119  | 0.000000000 |
| 6 | 1.473025000   | -1.909726000 | 0.000000000 | 6  | -12.649595002 | 0.829117663  | 0.000000000 |
| 1 | -1.192147000  | -4.066856000 | 0.000000000 | 6  | -12.644785748 | -0.682872913 | 0.000000000 |
| 1 | 1.192147000   | -4.066856000 | 0.000000000 | 6  | -11.875436639 | -1.837953186 | 0.000000000 |
| 1 | -1.192147000  | 4.066856000  | 0.000000000 | 6  | -10.398301510 | -1.848465410 | 0.000000000 |
| 1 | 1.192147000   | 4.066856000  | 0.000000000 | 6  | -14.066865472 | 0.827992063  | 0.000000000 |
| 6 | -13.957939000 | 3.105242000  | 0.000000000 | 6  | -14.061836749 | -0.687562570 | 0.000000000 |
| 1 | -14.456636000 | 4.068613000  | 0.000000000 | 6  | -14.829029514 | 1.988675066  | 0.000000000 |
| 6 | 5.114698000   | 3.104032000  | 0.000000000 | 6  | -16.307351562 | 2.001578822  | 0.000000000 |
| 6 | 7.371135000   | 1.909646000  | 0.000000000 | 6  | -17.077050783 | 0.851074912  | 0.000000000 |
| 6 | 5.895077000   | 1.909744000  | 0.000000000 | 6  | -17.074454309 | -0.664743441 | 0.000000000 |
| 6 | 5.129380000   | 0.756756000  | 0.000000000 | 6  | -16.325800867 | -1.829404814 | 0.000000000 |
| 6 | 3.714705000   | 0.756709000  | 0.000000000 | 6  | -14.847364470 | -1.833395005 | 0.000000000 |
| 6 | 3.729426000   | 3.104031000  | 0.000000000 | 6  | -18.497825790 | 0.837338433  | 0.000000000 |
| 6 | 9.537048000   | 3.103601000  | 0.000000000 | 6  | -18.495428676 | -0.652903720 | 0.000000000 |
| 6 | 8.136686000   | 0.756696000  | 0.000000000 | 6  | -19.236061062 | 1.989293341  | 0.000000000 |
| 6 | 10.317447000  | 1.909191000  | 0.000000000 | 6  | -18.506730974 | 3.197636137  | 0.000000000 |
| 6 | 9.551441000   | 0.756610000  | 0.000000000 | 6  | -17.125098689 | 3.179833852  | 0.000000000 |
| 6 | 2.949073000   | 1.909721000  | 0.000000000 | 6  | -14.042881206 | 3.174298050  | 0.000000000 |
| 6 | 5.895077000   | -1.909744000 | 0.000000000 | 6  | -12.664938556 | 3.145157758  | 0.000000000 |
| 6 | 5.129380000   | -0.756756000 | 0.000000000 | 6  | -9.594234303  | 3.146066433  | 0.000000000 |
| 6 | 2.949073000   | -1.909721000 | 0.000000000 | 6  | -8.216151109  | 3.119845520  | 0.000000000 |
| 6 | 3.729426000   | -3.104031000 | 0.000000000 | 6  | -5.142951266  | 3.122815641  | 0.000000000 |
| 6 | 5.114698000   | -3.104032000 | 0.000000000 | 6  | -3.764820524  | 3.096281504  | 0.000000000 |
| 6 | 7.371135000   | -1.909646000 | 0.000000000 | 6  | -0.691691754  | 3.098373945  | 0.000000000 |
| 6 | 8.151771000   | -3.103823000 | 0.000000000 | 6  | 0.686376307   | 3.071693097  | 0.000000000 |
| 6 | 8.136686000   | -0.756696000 | 0.000000000 | 6  | 3.759072948   | 3.073758543  | 0.000000000 |
| 6 | 9.537048000   | -3.103601000 | 0.000000000 | 6  | 5.137125412   | 3.047164768  | 0.000000000 |
| 6 | 9.551441000   | -0.756610000 | 0.000000000 | 6  | 8.209581870   | 3.049191327  | 0.000000000 |
| 6 | 10.317447000  | -1.909191000 | 0.000000000 | 6  | 9.587600568   | 3.022863713  | 0.000000000 |
| 6 | 3.714705000   | -0.756709000 | 0.000000000 | 9  | 10.176927419  | 4.243121081  | 0.000000000 |
| 1 | 3.229742000   | -4.066815000 | 0.000000000 | 1  | 7.752154559   | 4.025009733  | 0.000000000 |
| 1 | 5.614176000   | -4.066920000 | 0.000000000 | 9  | 5.727938926   | 4.266699233  | 0.000000000 |
| 1 | 7.652286000   | -4.066721000 | 0.000000000 | 1  | 3.301662628   | 4.049574869  | 0.000000000 |
| 1 | 10.036390000  | -4.066522000 | 0.000000000 | 9  | 1.277138016   | 4.291269803  | 0.000000000 |
| 6 | 13.957939000  | 3.105242000  | 0.000000000 | 1  | -1.149017875  | 4.074232882  | 0.000000000 |
| 6 | 14.739348000  | 1.912389000  | 0.000000000 | 9  | -3.174245447  | 4.315938076  | 0.000000000 |
| 6 | 13.975495000  | 0.757598000  | 0.000000000 | 1  | -5.600450543  | 4.098641380  | 0.000000000 |
| 6 | 12.560453000  | 0.756674000  | 0.000000000 | 9  | -7.625688812  | 4.339549616  | 0.000000000 |
| 6 | 12.572601000  | 3.104123000  | 0.000000000 | 1  | -10.051016743 | 4.122070849  | 0.000000000 |
| 6 | 11.793746000  | 1.909114000  | 0.000000000 | 9  | -12.072947850 | 4.363868753  | 0.000000000 |
| 6 | 14.739348000  | -1.912389000 | 0.000000000 | 1  | -14.498866339 | 4.151013775  | 0.000000000 |
| 6 | 13.975495000  | -0.757598000 | 0.000000000 | 9  | -16.537083345 | 4.397829280  | 0.000000000 |
| 6 | 11.793746000  | -1.909114000 | 0.000000000 | 1  | -19.011038864 | 4.156407829  | 0.000000000 |
| 6 | 12.572601000  | -3.104123000 | 0.000000000 | 35 | -21.128299311 | 2.013461287  | 0.000000000 |
| 6 | 13.957939000  | -3.105242000 | 0.000000000 | 6  | -19.250952405 | -1.793849284 | 0.000000000 |
| 6 | 12.560453000  | -0.756674000 | 0.000000000 | 6  | -18.497695790 | -2.991682367 | 0.000000000 |
| 1 | 12.072244000  | -4.066525000 | 0.000000000 | 1  | -16.656354725 | -3.995985757 | 0.000000000 |
| 1 | 14.456636000  | -4.068613000 | 0.000000000 | 9  | -19.159185839 | -4.158999417 | 0.000000000 |

|                  |               |              |             |
|------------------|---------------|--------------|-------------|
| 1                | 5.614176000   | 4.066920000  | 0.000000000 |
| 1                | 3.229742000   | 4.066815000  | 0.000000000 |
| 1                | 10.036390000  | 4.066522000  | 0.000000000 |
| 1                | 14.456636000  | 4.068613000  | 0.000000000 |
| 1                | 12.072244000  | 4.066525000  | 0.000000000 |
| 6                | 16.996652000  | 3.112900000  | 0.000000000 |
| 6                | 16.217659000  | 1.914733000  | 0.000000000 |
| 6                | 18.384847000  | 3.110216000  | 0.000000000 |
| 6                | 16.973333000  | 0.756519000  | 0.000000000 |
| 6                | 19.136389000  | 1.907510000  | 0.000000000 |
| 6                | 18.392554000  | 0.753664000  | 0.000000000 |
| 6                | 16.217659000  | -1.914733000 | 0.000000000 |
| 6                | 16.996652000  | -3.112900000 | 0.000000000 |
| 6                | 16.973333000  | -0.756519000 | 0.000000000 |
| 6                | 18.384847000  | -3.110216000 | 0.000000000 |
| 6                | 18.392554000  | -0.753664000 | 0.000000000 |
| 6                | 19.136389000  | -1.907510000 | 0.000000000 |
| 1                | 16.493312000  | -4.073899000 | 0.000000000 |
| 1                | 18.909161000  | -4.062014000 | 0.000000000 |
| 1                | 16.493312000  | 4.073899000  | 0.000000000 |
| 1                | 18.909161000  | 4.062014000  | 0.000000000 |
| 6                | 8.151771000   | 3.103823000  | 0.000000000 |
| 1                | 7.652286000   | 4.066721000  | 0.000000000 |
| 1                | 20.222021000  | 1.923701000  | 0.000000000 |
| 1                | 20.222021000  | -1.923701000 | 0.000000000 |
| 35               | -21.136115730 | -1.831583824 | 0.000000000 |
| 6                | -14.034927645 | -3.004373323 | 0.000000000 |
| 6                | -12.657007679 | -3.027409444 | 0.000000000 |
| 1                | -12.196918870 | -4.001833181 | 0.000000000 |
| 9                | -14.624410145 | -4.224338966 | 0.000000000 |
| 6                | -9.587600568  | -3.022863713 | 0.000000000 |
| 6                | -8.209581870  | -3.049191327 | 0.000000000 |
| 1                | -7.752154559  | -4.025009733 | 0.000000000 |
| 9                | -10.176927419 | -4.243121081 | 0.000000000 |
| 6                | -5.137125412  | -3.047164768 | 0.000000000 |
| 6                | -3.759072948  | -3.073758543 | 0.000000000 |
| 1                | -3.301662628  | -4.049574869 | 0.000000000 |
| 9                | -5.727938926  | -4.266699233 | 0.000000000 |
| 6                | -0.686376307  | -3.071693097 | 0.000000000 |
| 6                | 0.691691754   | -3.098373945 | 0.000000000 |
| 9                | -1.277138016  | -4.291269803 | 0.000000000 |
| 1                | 1.149017875   | -4.074232882 | 0.000000000 |
| 6                | 3.764820524   | -3.096281504 | 0.000000000 |
| 6                | 5.142951266   | -3.122815641 | 0.000000000 |
| 6                | 8.216151109   | -3.119845520 | 0.000000000 |
| 6                | 9.594234303   | -3.146066433 | 0.000000000 |
| 1                | 10.051016743  | -4.122070849 | 0.000000000 |
| 9                | 7.625688812   | -4.339549616 | 0.000000000 |
| 1                | 5.600450543   | -4.098641380 | 0.000000000 |
| 9                | 3.174245447   | -4.315938076 | 0.000000000 |
| <b>10Bp_H</b>    |               |              |             |
| 6                | -19.208558000 | 3.112794000  | 0.000000000 |
| 6                | -16.950931000 | 1.912450000  | 0.000000000 |
| 6                | -18.429326000 | 1.914789000  | 0.000000000 |
| 6                | -19.184854000 | 0.756434000  | 0.000000000 |
| 6                | -20.604151000 | 0.753623000  | 0.000000000 |
| 6                | -20.596777000 | 3.110126000  | 0.000000000 |
| 6                | -14.784014000 | 3.104060000  | 0.000000000 |
| 6                | -16.187248000 | 0.757519000  | 0.000000000 |
| 6                | -14.005431000 | 1.909059000  | 0.000000000 |
| 6                | -14.772140000 | 0.756565000  | 0.000000000 |
| 6                | -21.348063000 | 1.907501000  | 0.000000000 |
| 1                | -22.433710000 | 1.923014000  | 0.000000000 |
| 6                | -18.429326000 | -1.914789000 | 0.000000000 |
| 6                | -19.184854000 | -0.756434000 | 0.000000000 |
| 6                | -21.348063000 | -1.907501000 | 0.000000000 |
| 6                | -20.596777000 | -3.110126000 | 0.000000000 |
| 6                | -19.208558000 | -3.112794000 | 0.000000000 |
| 6                | -16.950931000 | -1.912450000 | 0.000000000 |
| 6                | -16.169351000 | -3.105224000 | 0.000000000 |
| 6                | -16.187248000 | -0.757519000 | 0.000000000 |
| 6                | -14.784014000 | -3.104060000 | 0.000000000 |
| 6                | -14.772140000 | -0.756565000 | 0.000000000 |
| 6                | -14.005431000 | -1.909059000 | 0.000000000 |
| 6                | -20.604151000 | -0.753623000 | 0.000000000 |
| 1                | -22.433710000 | -1.923014000 | 0.000000000 |
| 1                | -21.121073000 | -4.061923000 | 0.000000000 |
| 1                | -18.705278000 | -4.073692000 | 0.000000000 |
| 1                | -16.668189000 | -4.068375000 | 0.000000000 |
| 1                | -14.283400000 | -4.066333000 | 0.000000000 |
| 6                | -10.363345000 | 3.103728000  | 0.000000000 |
| 6                | -9.582736000  | 1.909606000  | 0.000000000 |
| 6                | -10.348253000 | 0.756603000  | 0.000000000 |
| 6                | -11.763070000 | 0.756490000  | 0.000000000 |
| 6                | -11.748669000 | 3.103438000  | 0.000000000 |
| 6                | -12.529085000 | 1.909082000  | 0.000000000 |
| 6                | -9.582736000  | -1.909606000 | 0.000000000 |
| 6                | -10.348253000 | -0.756603000 | 0.000000000 |
| 6                | -12.529085000 | -1.909082000 | 0.000000000 |
| 6                | -11.748669000 | -3.103438000 | 0.000000000 |
| 6                | -10.363345000 | -3.103728000 | 0.000000000 |
| 6                | -11.763070000 | -0.756490000 | 0.000000000 |
| 1                | -12.248339000 | -4.066179000 | 0.000000000 |
| 1                | -9.863976000  | -4.066651000 | 0.000000000 |
| 1                | -18.705278000 | 4.073692000  | 0.000000000 |
| 1                | -21.121073000 | 4.061923000  | 0.000000000 |
| 1                | -14.283400000 | 4.066333000  | 0.000000000 |
| 1                | -9.863976000  | 4.066651000  | 0.000000000 |
| 1                | -12.248339000 | 4.066179000  | 0.000000000 |
| <b>10Bp_F_Br</b> |               |              |             |
| 6                | -21.474803573 | -1.800927083 | 0.000000000 |
| 6                | -20.720320185 | -2.997954207 | 0.000000000 |
| 6                | -19.340014212 | -3.026300717 | 0.000000000 |
| 6                | -18.549691305 | -1.833450815 | 0.000000000 |
| 6                | -19.299527829 | -0.669536687 | 0.000000000 |
| 6                | -20.720468851 | -0.659146160 | 0.000000000 |
| 6                | -19.303557839 | 0.846246511  | 0.000000000 |
| 6                | -20.724344638 | 0.831128043  | 0.000000000 |
| 6                | -21.463686092 | 1.982362164  | 0.000000000 |
| 6                | -20.735551319 | 3.191434813  | 0.000000000 |
| 6                | -19.353908997 | 3.174972209  | 0.000000000 |
| 6                | -18.535012807 | 1.997510368  | 0.000000000 |
| 6                | -17.071296522 | -1.835865781 | 0.000000000 |
| 6                | -16.286925086 | -0.689276667 | 0.000000000 |
| 6                | -16.293329355 | 0.826241583  | 0.000000000 |
| 6                | -17.056664736 | 1.986137522  | 0.000000000 |
| 6                | -16.257874733 | -3.006099053 | 0.000000000 |
| 6                | -14.879939166 | -3.027869454 | 0.000000000 |
| 6                | -14.099467607 | -1.837648709 | 0.000000000 |
| 6                | -14.869883894 | -0.683299858 | 0.000000000 |
| 6                | -14.876043673 | 0.828672215  | 0.000000000 |
| 6                | -14.084981777 | 1.969331111  | 0.000000000 |
| 6                | -14.893715530 | 3.144715610  | 0.000000000 |
| 6                | -16.271681911 | 3.172539220  | 0.000000000 |
| 6                | -12.622331730 | -1.846697885 | 0.000000000 |
| 6                | -11.832893379 | -0.705937428 | 0.000000000 |
| 6                | -11.839226373 | 0.805344444  | 0.000000000 |
| 6                | -12.607416691 | 1.960110934  | 0.000000000 |
| 6                | -11.810627958 | -3.020367195 | 0.000000000 |
| 6                | -10.432624949 | -3.045478946 | 0.000000000 |
| 6                | -9.648212309  | -1.857397575 | 0.000000000 |
| 6                | -10.416043731 | -0.702224752 | 0.000000000 |
| 6                | -10.422129723 | 0.809271973  | 0.000000000 |
| 6                | -11.822805466 | 3.148532385  | 0.000000000 |
| 6                | -10.444726810 | 3.123559282  | 0.000000000 |
| 6                | -9.632807505  | 1.950218973  | 0.000000000 |
| 6                | -8.171297925  | -1.866981726 | 0.000000000 |
| 6                | -7.360123581  | -3.040741571 | 0.000000000 |
| 6                | -5.982098085  | -3.066178431 | 0.000000000 |
| 6                | -5.197597163  | -1.878036470 | 0.000000000 |
| 6                | -5.965148135  | -0.722552949 | 0.000000000 |
| 6                | -7.381945433  | -0.725975866 | 0.000000000 |
| 6                | -3.720614441  | -1.887762941 | 0.000000000 |
| 6                | -2.909470371  | -3.061581646 | 0.000000000 |
| 6                | -1.531427639  | -3.087182588 | 0.000000000 |
| 6                | -0.746753086  | -1.899120436 | 0.000000000 |
| 6                | -1.514245817  | -0.743585186 | 0.000000000 |
| 6                | -2.931094355  | -0.746844863 | 0.000000000 |

|   |               |              |             |    |              |              |             |
|---|---------------|--------------|-------------|----|--------------|--------------|-------------|
| 6 | -7.326085000  | 3.103815000  | 0.000000000 | 6  | 0.730314044  | -1.908974301 | 0.000000000 |
| 6 | -8.106565000  | 1.909579000  | 0.000000000 | 6  | 1.541517108  | -3.082794281 | 0.000000000 |
| 6 | -5.940744000  | 3.103800000  | 0.000000000 | 6  | 2.919603644  | -3.108437427 | 0.000000000 |
| 6 | -7.340784000  | 0.756618000  | 0.000000000 | 6  | 3.704332145  | -1.920386527 | 0.000000000 |
| 6 | -5.160399000  | 1.909541000  | 0.000000000 | 6  | 2.936811345  | -0.764866146 | 0.000000000 |
| 6 | -5.926090000  | 0.756651000  | 0.000000000 | 6  | 1.519929863  | -0.768113669 | 0.000000000 |
| 6 | -8.106565000  | -1.909579000 | 0.000000000 | 6  | -1.519929863 | 0.768113669  | 0.000000000 |
| 6 | -7.326085000  | -3.103815000 | 0.000000000 | 6  | -2.936811345 | 0.764866146  | 0.000000000 |
| 6 | -7.340784000  | -0.756618000 | 0.000000000 | 6  | -5.970956189 | 0.789144483  | 0.000000000 |
| 6 | -5.940744000  | -3.103800000 | 0.000000000 | 6  | -7.387868658 | 0.785685102  | 0.000000000 |
| 6 | -5.926090000  | -0.756651000 | 0.000000000 | 6  | 1.514245817  | 0.743585186  | 0.000000000 |
| 6 | -5.160399000  | -1.909541000 | 0.000000000 | 6  | 2.931094355  | 0.746844863  | 0.000000000 |
| 1 | -7.825772000  | -4.066568000 | 0.000000000 | 6  | -8.155594368 | 1.941010435  | 0.000000000 |
| 1 | -5.441282000  | -4.066635000 | 0.000000000 | 6  | -7.371064069 | 3.129233260  | 0.000000000 |
| 1 | -7.825772000  | 4.066568000  | 0.000000000 | 6  | -5.992930607 | 3.103788897  | 0.000000000 |
| 1 | -5.441282000  | 4.066635000  | 0.000000000 | 6  | -5.181478940 | 1.930097761  | 0.000000000 |
| 6 | -2.903855000  | 3.103809000  | 0.000000000 | 6  | -3.704332145 | 1.920386527  | 0.000000000 |
| 6 | -3.684242000  | 1.909544000  | 0.000000000 | 6  | -2.919603644 | 3.108437427  | 0.000000000 |
| 6 | -1.518535000  | 3.103889000  | 0.000000000 | 6  | -1.541517108 | 3.082794281  | 0.000000000 |
| 6 | -2.918553000  | 0.756652000  | 0.000000000 | 6  | -0.730314044 | 1.908974301  | 0.000000000 |
| 6 | -0.738084000  | 1.909626000  | 0.000000000 | 6  | 0.746753086  | 1.899120436  | 0.000000000 |
| 6 | -1.503819000  | 0.756641000  | 0.000000000 | 6  | 1.531427639  | 3.087182588  | 0.000000000 |
| 6 | -3.684242000  | -1.909544000 | 0.000000000 | 6  | 2.909470371  | 3.061581646  | 0.000000000 |
| 6 | -2.903855000  | -3.103809000 | 0.000000000 | 6  | 3.720614441  | 1.887762941  | 0.000000000 |
| 6 | -2.918553000  | -0.756652000 | 0.000000000 | 6  | 5.181478940  | -1.930097761 | 0.000000000 |
| 6 | -1.518535000  | -3.103889000 | 0.000000000 | 6  | 5.992930607  | -3.103788897 | 0.000000000 |
| 6 | -1.503819000  | -0.756641000 | 0.000000000 | 6  | 7.371064069  | -3.129233260 | 0.000000000 |
| 6 | -0.738084000  | -1.909626000 | 0.000000000 | 6  | 8.155594368  | -1.941010435 | 0.000000000 |
| 1 | -3.403438000  | -4.066564000 | 0.000000000 | 6  | 7.387868658  | -0.785685102 | 0.000000000 |
| 1 | -1.018944000  | -4.066715000 | 0.000000000 | 6  | 5.970956189  | -0.789144483 | 0.000000000 |
| 1 | -3.403438000  | 4.066564000  | 0.000000000 | 6  | 5.965148135  | 0.722552949  | 0.000000000 |
| 1 | -1.018944000  | 4.066715000  | 0.000000000 | 6  | 7.381945433  | 0.725975866  | 0.000000000 |
| 6 | -16.169351000 | 3.105224000  | 0.000000000 | 6  | 5.197597163  | 1.878036470  | 0.000000000 |
| 1 | -16.668189000 | 4.068375000  | 0.000000000 | 6  | 5.982098085  | 3.066178431  | 0.000000000 |
| 6 | 2.903855000   | 3.103809000  | 0.000000000 | 6  | 7.360123581  | 3.040741571  | 0.000000000 |
| 6 | 5.160399000   | 1.909541000  | 0.000000000 | 6  | 8.171297925  | 1.866981726  | 0.000000000 |
| 6 | 3.684242000   | 1.909544000  | 0.000000000 | 6  | 9.648212309  | 1.857397575  | 0.000000000 |
| 6 | 2.918553000   | 0.756652000  | 0.000000000 | 6  | 10.416043731 | 0.702224752  | 0.000000000 |
| 6 | 1.503819000   | 0.756641000  | 0.000000000 | 6  | 10.422129723 | -0.809271973 | 0.000000000 |
| 6 | 1.518535000   | 3.103889000  | 0.000000000 | 6  | 9.632807505  | -1.950218973 | 0.000000000 |
| 6 | 7.326085000   | 3.103815000  | 0.000000000 | 6  | 10.444726810 | -3.123559282 | 0.000000000 |
| 6 | 5.926090000   | 0.756651000  | 0.000000000 | 6  | 11.822805466 | -3.148532385 | 0.000000000 |
| 6 | 8.106565000   | 1.909579000  | 0.000000000 | 6  | 12.607416691 | -1.960110934 | 0.000000000 |
| 6 | 7.340784000   | 0.756618000  | 0.000000000 | 6  | 11.839226373 | -0.805344444 | 0.000000000 |
| 6 | 0.738084000   | 1.909626000  | 0.000000000 | 6  | 11.832893379 | 0.705937428  | 0.000000000 |
| 6 | 3.684242000   | -1.909544000 | 0.000000000 | 6  | 10.432624949 | 3.045478946  | 0.000000000 |
| 6 | 2.918553000   | -0.756652000 | 0.000000000 | 6  | 11.810627958 | 3.020367195  | 0.000000000 |
| 6 | 0.738084000   | -1.909626000 | 0.000000000 | 6  | 12.622331730 | 1.846697885  | 0.000000000 |
| 6 | 1.518535000   | -3.103889000 | 0.000000000 | 6  | 14.099467607 | 1.837648709  | 0.000000000 |
| 6 | 2.903855000   | -3.103809000 | 0.000000000 | 6  | 14.869883894 | 0.683299858  | 0.000000000 |
| 6 | 5.160399000   | -1.909541000 | 0.000000000 | 6  | 14.876043673 | -0.828672215 | 0.000000000 |
| 6 | 5.940744000   | -3.103800000 | 0.000000000 | 6  | 14.084981777 | -1.969331111 | 0.000000000 |
| 6 | 5.926090000   | -0.756651000 | 0.000000000 | 6  | 14.893715530 | -3.144715610 | 0.000000000 |
| 6 | 7.326085000   | -3.103815000 | 0.000000000 | 6  | 16.271681911 | -3.172539220 | 0.000000000 |
| 6 | 7.340784000   | -0.756618000 | 0.000000000 | 6  | 17.056664736 | -1.986137522 | 0.000000000 |
| 6 | 8.106565000   | -1.909579000 | 0.000000000 | 6  | 16.293329355 | -0.826241583 | 0.000000000 |
| 6 | 1.503819000   | -0.756641000 | 0.000000000 | 6  | 16.286925086 | 0.689276667  | 0.000000000 |
| 1 | 1.018944000   | -4.066715000 | 0.000000000 | 6  | 17.071296522 | 1.835865781  | 0.000000000 |
| 1 | 3.403438000   | -4.066564000 | 0.000000000 | 6  | 16.257874733 | 3.006099053  | 0.000000000 |
| 1 | 5.441282000   | -4.066635000 | 0.000000000 | 6  | 14.879939166 | 3.027869454  | 0.000000000 |
| 1 | 7.825772000   | -4.066568000 | 0.000000000 | 6  | 18.535012807 | -1.997510368 | 0.000000000 |
| 6 | 11.748669000  | 3.103438000  | 0.000000000 | 6  | 19.303557839 | -0.846246511 | 0.000000000 |
| 6 | 12.529085000  | 1.909082000  | 0.000000000 | 6  | 19.299527829 | 0.669536687  | 0.000000000 |
| 6 | 11.763070000  | 0.756490000  | 0.000000000 | 6  | 18.549691305 | 1.833450815  | 0.000000000 |
| 6 | 10.348253000  | 0.756603000  | 0.000000000 | 6  | 19.353908997 | -3.174972209 | 0.000000000 |
| 6 | 10.363345000  | 3.103728000  | 0.000000000 | 6  | 20.735551319 | -3.191434813 | 0.000000000 |
| 6 | 9.582736000   | 1.909606000  | 0.000000000 | 6  | 21.463686092 | -1.982362164 | 0.000000000 |
| 6 | 12.529085000  | -1.909082000 | 0.000000000 | 6  | 20.724344638 | -0.831128043 | 0.000000000 |
| 6 | 11.763070000  | -0.756490000 | 0.000000000 | 6  | 20.720468851 | 0.659146160  | 0.000000000 |
| 6 | 9.582736000   | -1.909606000 | 0.000000000 | 6  | 21.474803573 | 1.800927083  | 0.000000000 |
| 6 | 10.363345000  | -3.103728000 | 0.000000000 | 6  | 20.720320185 | 2.997954207  | 0.000000000 |
| 6 | 11.748669000  | -3.103438000 | 0.000000000 | 6  | 19.340014212 | 3.026300717  | 0.000000000 |
| 6 | 10.348253000  | -0.756603000 | 0.000000000 | 35 | 23.359906573 | 1.840778795  | 0.000000000 |
| 1 | 9.863976000   | -4.066651000 | 0.000000000 | 35 | 23.355940331 | -2.004541424 | 0.000000000 |

|   |              |              |             |    |               |              |             |
|---|--------------|--------------|-------------|----|---------------|--------------|-------------|
| 1 | 12.248339000 | -4.066179000 | 0.000000000 | 1  | 21.240819745  | -4.149704914 | 0.000000000 |
| 1 | 3.403438000  | 4.066564000  | 0.000000000 | 9  | 18.767006805  | -4.393483590 | 0.000000000 |
| 1 | 1.018944000  | 4.066715000  | 0.000000000 | 1  | 16.728735067  | -4.148795009 | 0.000000000 |
| 1 | 7.825772000  | 4.066568000  | 0.000000000 | 9  | 14.302957702  | -4.363999046 | 0.000000000 |
| 1 | 12.248339000 | 4.066179000  | 0.000000000 | 1  | 12.280552822  | -4.124102398 | 0.000000000 |
| 1 | 9.863976000  | 4.066651000  | 0.000000000 | 9  | 9.855601177   | -4.343878330 | 0.000000000 |
| 6 | 14.784014000 | 3.104060000  | 0.000000000 | 1  | 7.829337006   | -4.104679719 | 0.000000000 |
| 6 | 14.005431000 | 1.909059000  | 0.000000000 | 9  | 5.403324966   | -4.323893707 | 0.000000000 |
| 6 | 16.169351000 | 3.105224000  | 0.000000000 | 1  | 3.377739331   | -4.083937248 | 0.000000000 |
| 6 | 14.772140000 | 0.756565000  | 0.000000000 | 9  | 0.951772697   | -4.302849444 | 0.000000000 |
| 6 | 16.950931000 | 1.912450000  | 0.000000000 | 1  | -1.073255808  | -4.062651576 | 0.000000000 |
| 6 | 16.187248000 | 0.757519000  | 0.000000000 | 9  | -3.499213782  | -4.281636814 | 0.000000000 |
| 6 | 14.005431000 | -1.909059000 | 0.000000000 | 1  | -5.523792939  | -4.041580040 | 0.000000000 |
| 6 | 14.784014000 | -3.104060000 | 0.000000000 | 9  | -7.949755124  | -4.260825260 | 0.000000000 |
| 6 | 14.772140000 | -0.756565000 | 0.000000000 | 1  | -9.974310747  | -4.020868597 | 0.000000000 |
| 6 | 16.169351000 | -3.105224000 | 0.000000000 | 9  | -12.398919547 | -4.241108130 | 0.000000000 |
| 6 | 16.187248000 | -0.757519000 | 0.000000000 | 1  | -14.418864354 | -4.001845944 | 0.000000000 |
| 6 | 16.950931000 | -1.912450000 | 0.000000000 | 9  | -16.846503581 | -4.226465414 | 0.000000000 |
| 1 | 14.283400000 | -4.066333000 | 0.000000000 | 1  | -18.877808850 | -4.000376472 | 0.000000000 |
| 1 | 16.668189000 | -4.068375000 | 0.000000000 | 9  | -21.380584043 | -4.165969442 | 0.000000000 |
| 1 | 14.283400000 | 4.066333000  | 0.000000000 | 35 | -23.359906573 | -1.840778795 | 0.000000000 |
| 1 | 16.668189000 | 4.068375000  | 0.000000000 | 35 | -23.355940331 | 2.004541424  | 0.000000000 |
| 6 | 19.208558000 | 3.112794000  | 0.000000000 | 1  | -21.240819745 | 4.149704914  | 0.000000000 |
| 6 | 18.429326000 | 1.914789000  | 0.000000000 | 9  | -18.767006805 | 4.393483590  | 0.000000000 |
| 6 | 20.596777000 | 3.110126000  | 0.000000000 | 1  | -16.728735067 | 4.148795009  | 0.000000000 |
| 6 | 19.184854000 | 0.756434000  | 0.000000000 | 9  | -14.302957702 | 4.363999046  | 0.000000000 |
| 6 | 21.348063000 | 1.907501000  | 0.000000000 | 1  | -12.280552822 | 4.124102398  | 0.000000000 |
| 6 | 20.604151000 | 0.753623000  | 0.000000000 | 9  | -9.855601177  | 4.343878330  | 0.000000000 |
| 6 | 18.429326000 | -1.914789000 | 0.000000000 | 1  | -7.829337006  | 4.104679719  | 0.000000000 |
| 6 | 19.208558000 | -3.112794000 | 0.000000000 | 9  | -5.403324966  | 4.323893707  | 0.000000000 |
| 6 | 19.184854000 | -0.756434000 | 0.000000000 | 1  | -3.377739331  | 4.083937248  | 0.000000000 |
| 6 | 20.596777000 | -3.110126000 | 0.000000000 | 9  | -0.951772697  | 4.302849444  | 0.000000000 |
| 6 | 20.604151000 | -0.753623000 | 0.000000000 | 1  | 1.073255808   | 4.062651576  | 0.000000000 |
| 6 | 21.348063000 | -1.907501000 | 0.000000000 | 9  | 3.499213782   | 4.281636814  | 0.000000000 |
| 1 | 22.433710000 | 1.923014000  | 0.000000000 | 1  | 5.523792939   | 4.041580040  | 0.000000000 |
| 1 | 18.705278000 | -4.073692000 | 0.000000000 | 9  | 7.949755124   | 4.260825260  | 0.000000000 |
| 1 | 21.121073000 | -4.061923000 | 0.000000000 | 1  | 9.974310747   | 4.020868597  | 0.000000000 |
| 1 | 22.433710000 | -1.923014000 | 0.000000000 | 9  | 12.398919547  | 4.241108130  | 0.000000000 |
| 1 | 18.705278000 | 4.073692000  | 0.000000000 | 1  | 14.418864354  | 4.001845944  | 0.000000000 |
| 1 | 21.121073000 | 4.061923000  | 0.000000000 | 9  | 16.846503581  | 4.226465414  | 0.000000000 |
| 6 | 5.940744000  | 3.103800000  | 0.000000000 | 1  | 18.877808850  | 4.000376472  | 0.000000000 |
| 1 | 5.441282000  | 4.066635000  | 0.000000000 | 9  | 21.380584043  | 4.165969442  | 0.000000000 |

Table 2. The Cartesian coordinates of the optimized molecular structures of 2<sub>m</sub> Bp-nanoribbons with zigzag edges (m=2-5) at the B3LYP/6-31G(d,p) level of theory

| 2_2Bp_H |              |              |             | 2_2Bp_F_Br |             |              |             |
|---------|--------------|--------------|-------------|------------|-------------|--------------|-------------|
| 6       | -1.898606000 | 0.733252000  | 0.000000000 | 6          | 1.232509264 | 2.780869209  | 0.000000000 |
| 6       | -1.898606000 | -0.733252000 | 0.000000000 | 6          | 3.270257862 | 0.984461607  | 0.000000000 |
| 6       | -3.060826000 | -1.522108000 | 0.000000000 | 6          | 6.337679339 | -4.056441556 | 0.000000000 |
| 6       | -3.066187000 | -2.934733000 | 0.000000000 | 6          | 5.020498373 | -4.577118980 | 0.000000000 |
| 6       | -3.060826000 | 1.522108000  | 0.000000000 | 6          | 4.009006958 | -3.660207078 | 0.000000000 |
| 6       | -1.912190000 | 3.725214000  | 0.000000000 | 6          | 4.263080219 | -2.257575862 | 0.000000000 |
| 6       | -3.066187000 | 2.934733000  | 0.000000000 | 6          | 5.524775802 | -1.686313702 | 0.000000000 |
| 6       | -1.912190000 | -3.725214000 | 0.000000000 | 6          | 6.552064447 | -2.695401907 | 0.000000000 |
| 6       | -5.720383000 | -0.740123000 | 0.000000000 | 1          | 7.197537414 | -4.715140857 | 0.000000000 |
| 6       | -4.570795000 | -1.505988000 | 0.000000000 | 35         | 4.739853045 | -6.448768696 | 0.000000000 |
| 6       | -5.729260000 | -3.665448000 | 0.000000000 | 6          | 2.535722646 | -3.404189740 | 0.000000000 |
| 6       | -6.931984000 | -2.902506000 | 0.000000000 | 6          | 2.766992414 | -2.011736033 | 0.000000000 |
| 6       | -6.927074000 | -1.518732000 | 0.000000000 | 6          | 5.772824955 | -0.225565054 | 0.000000000 |
| 6       | -5.720383000 | 0.740123000  | 0.000000000 | 6          | 7.088376944 | 0.351669513  | 0.000000000 |
| 6       | -6.927074000 | 1.518732000  | 0.000000000 | 6          | 7.295151501 | 1.712831572  | 0.000000000 |
| 6       | -4.570795000 | 1.505988000  | 0.000000000 | 6          | 6.241210121 | 2.665812663  | 0.000000000 |
| 6       | -6.931984000 | 2.902506000  | 0.000000000 | 6          | 4.989089014 | 2.121641171  | 0.000000000 |
| 6       | -4.575451000 | 2.929163000  | 0.000000000 | 6          | 4.757698353 | 0.714928633  | 0.000000000 |
| 6       | -5.729260000 | 3.665448000  | 0.000000000 | 1          | 7.968674012 | -0.270535680 | 0.000000000 |
| 6       | -4.575451000 | -2.929163000 | 0.000000000 | 9          | 7.850623480 | -2.316413217 | 0.000000000 |
| 1       | -1.920348000 | 4.810201000  | 0.000000000 | 9          | 8.557456032 | 2.169064684  | 0.000000000 |
| 1       | -7.885483000 | -3.423476000 | 0.000000000 | 35         | 6.610434363 | 4.514409955  | 0.000000000 |
| 1       | -7.884837000 | -1.010241000 | 0.000000000 | 6          | 3.514373723 | 2.375672969  | 0.000000000 |

|                |               |              |             |                   |              |              |             |
|----------------|---------------|--------------|-------------|-------------------|--------------|--------------|-------------|
| 1              | -7.884837000  | 1.010241000  | 0.000000000 | 6                 | 1.993849519  | 0.402935213  | 0.000000000 |
| 1              | -7.885483000  | 3.423476000  | 0.000000000 | 6                 | 1.752770597  | -1.039947538 | 0.000000000 |
| 1              | -5.754211000  | 4.750758000  | 0.000000000 | 6                 | 1.263330919  | -3.977633349 | 0.000000000 |
| 6              | 1.898606000   | -0.733252000 | 0.000000000 | 6                 | 0.248233576  | -3.032881407 | 0.000000000 |
| 6              | 3.060826000   | -1.522108000 | 0.000000000 | 6                 | 0.489341033  | -1.634734482 | 0.000000000 |
| 6              | 1.912190000   | -3.725214000 | 0.000000000 | 35                | 0.960552298  | -5.839837499 | 0.000000000 |
| 6              | 0.756114000   | -2.952104000 | 0.000000000 | 6                 | -1.232509264 | -2.780869209 | 0.000000000 |
| 6              | 0.752726000   | -1.532696000 | 0.000000000 | 6                 | -0.996957422 | -1.382391306 | 0.000000000 |
| 6              | 1.898606000   | 0.733252000  | 0.000000000 | 6                 | -2.504227205 | -3.336911319 | 0.000000000 |
| 6              | -0.752726000  | -1.532696000 | 0.000000000 | 6                 | -3.514373723 | -2.375672969 | 0.000000000 |
| 6              | 0.752726000   | 1.532696000  | 0.000000000 | 6                 | -3.270257862 | -0.984461607 | 0.000000000 |
| 6              | -0.752726000  | 1.532696000  | 0.000000000 | 6                 | -1.993849519 | -0.402935213 | 0.000000000 |
| 6              | -0.756114000  | -2.952104000 | 0.000000000 | 35                | -2.833930714 | -5.194146703 | 0.000000000 |
| 6              | 3.060826000   | 1.522108000  | 0.000000000 | 6                 | -4.989089014 | -2.121641171 | 0.000000000 |
| 6              | -0.756114000  | 2.952104000  | 0.000000000 | 6                 | -4.757698353 | -0.714928633 | 0.000000000 |
| 6              | 0.756114000   | 2.952104000  | 0.000000000 | 6                 | -6.241210121 | -2.665812663 | 0.000000000 |
| 6              | 3.066187000   | 2.934733000  | 0.000000000 | 6                 | -7.295151501 | -1.712831572 | 0.000000000 |
| 6              | 1.912190000   | 3.725214000  | 0.000000000 | 6                 | -7.088376944 | -0.351669513 | 0.000000000 |
| 6              | 3.066187000   | -2.934733000 | 0.000000000 | 6                 | -5.772824955 | 0.225565054  | 0.000000000 |
| 1              | 1.920348000   | 4.810201000  | 0.000000000 | 35                | -6.610434363 | -4.514409955 | 0.000000000 |
| 6              | 5.720383000   | -0.740123000 | 0.000000000 | 9                 | -8.557456032 | -2.169064684 | 0.000000000 |
| 6              | 6.927074000   | -1.518732000 | 0.000000000 | 1                 | -7.968674012 | 0.270535680  | 0.000000000 |
| 6              | 5.729260000   | -3.665448000 | 0.000000000 | 6                 | -5.524775802 | 1.686313702  | 0.000000000 |
| 6              | 4.575451000   | -2.929163000 | 0.000000000 | 6                 | -4.263080219 | 2.257575862  | 0.000000000 |
| 6              | 4.570795000   | -1.505988000 | 0.000000000 | 6                 | -4.009006958 | 3.660207078  | 0.000000000 |
| 6              | 5.720383000   | 0.740123000  | 0.000000000 | 6                 | -5.020498373 | 4.577118980  | 0.000000000 |
| 6              | 4.570795000   | 1.505988000  | 0.000000000 | 6                 | -6.337679339 | 4.056441556  | 0.000000000 |
| 6              | 6.927074000   | 1.518732000  | 0.000000000 | 6                 | -6.552064447 | 2.695401907  | 0.000000000 |
| 6              | 4.575451000   | 2.929163000  | 0.000000000 | 6                 | -2.766992414 | 2.011736033  | 0.000000000 |
| 6              | 6.931984000   | 2.902506000  | 0.000000000 | 6                 | -2.535722646 | 3.404189740  | 0.000000000 |
| 6              | 5.729260000   | 3.665448000  | 0.000000000 | 6                 | -1.263330919 | 3.977633349  | 0.000000000 |
| 1              | 7.885483000   | 3.423476000  | 0.000000000 | 6                 | -0.248233576 | 3.032881407  | 0.000000000 |
| 1              | 7.884837000   | -1.010241000 | 0.000000000 | 6                 | -0.489341033 | 1.634734482  | 0.000000000 |
| 1              | 7.884837000   | 1.010241000  | 0.000000000 | 6                 | -1.752770597 | 1.039947538  | 0.000000000 |
| 6              | 6.931984000   | -2.902506000 | 0.000000000 | 6                 | 0.996957422  | 1.382391306  | 0.000000000 |
| 1              | 7.885483000   | -3.423476000 | 0.000000000 | 6                 | 2.504227205  | 3.336911319  | 0.000000000 |
| 1              | 5.754211000   | 4.750758000  | 0.000000000 | 35                | 2.833930714  | 5.194146703  | 0.000000000 |
| 1              | -1.920348000  | -4.810201000 | 0.000000000 | 35                | -0.960552298 | 5.839837499  | 0.000000000 |
| 1              | -5.754211000  | -4.750758000 | 0.000000000 | 35                | -4.739853045 | 6.448768696  | 0.000000000 |
| 1              | 1.920348000   | -4.810201000 | 0.000000000 | 1                 | -7.197537414 | 4.715140857  | 0.000000000 |
| 1              | 5.754211000   | -4.750758000 | 0.000000000 | 9                 | -7.850623480 | 2.316413217  | 0.000000000 |
| <b>2_3Bp_H</b> |               |              |             | <b>2_3Bp_F_Br</b> |              |              |             |
| 6              | -4.568494000  | 1.530223000  | 0.000000000 | 1                 | 11.629905884 | 3.682337938  | 0.000000000 |
| 6              | -10.748827000 | 2.902901000  | 0.000000000 | 6                 | 10.682603409 | 3.156847618  | 0.000000000 |
| 6              | -9.545950000  | 3.665282000  | 0.000000000 | 6                 | 10.694250488 | 1.779524939  | 0.000000000 |
| 6              | -10.744256000 | 1.519117000  | 0.000000000 | 6                 | 9.529782700  | 0.931593782  | 0.000000000 |
| 6              | -9.537888000  | 0.739808000  | 0.000000000 | 6                 | 9.561294002  | -0.549161504 | 0.000000000 |
| 6              | -8.387546000  | 1.505391000  | 0.000000000 | 6                 | 10.778380350 | -1.314012463 | 0.000000000 |
| 6              | -8.392254000  | 2.928737000  | 0.000000000 | 6                 | 8.365623790  | 1.681673501  | 0.000000000 |
| 6              | -6.883131000  | 2.933691000  | 0.000000000 | 6                 | 6.849748267  | 1.659216124  | 0.000000000 |
| 6              | -6.877950000  | 1.521744000  | 0.000000000 | 6                 | 5.701784401  | 0.846725758  | 0.000000000 |
| 6              | -5.714313000  | 0.732224000  | 0.000000000 | 6                 | 5.728997969  | -0.614775243 | 0.000000000 |
| 6              | -4.573341000  | 2.950290000  | 0.000000000 | 6                 | 6.908152258  | -1.377977525 | 0.000000000 |
| 6              | -5.727664000  | 3.723717000  | 0.000000000 | 6                 | 8.419057655  | -1.330020282 | 0.000000000 |
| 1              | -9.569338000  | 4.750750000  | 0.000000000 | 6                 | 8.440636836  | -2.755962693 | 0.000000000 |
| 1              | -11.702798000 | 3.423325000  | 0.000000000 | 6                 | 10.781989106 | -2.690135652 | 0.000000000 |
| 1              | -11.702425000 | 1.011073000  | 0.000000000 | 6                 | 9.598815981  | -3.478093341 | 0.000000000 |
| 6              | -9.537888000  | -0.739808000 | 0.000000000 | 6                 | 6.944330045  | -2.788336529 | 0.000000000 |
| 6              | -8.387546000  | -1.505391000 | 0.000000000 | 6                 | 5.802489482  | -3.591123127 | 0.000000000 |
| 6              | -6.877950000  | -1.521744000 | 0.000000000 | 6                 | 4.627602969  | -2.854845509 | 0.000000000 |
| 6              | -5.714313000  | -0.732224000 | 0.000000000 | 6                 | 4.599892353  | -1.436081864 | 0.000000000 |
| 6              | -4.568494000  | -1.530223000 | 0.000000000 | 6                 | 9.455462566  | 3.865140058  | 0.000000000 |
| 6              | -5.727664000  | -3.723717000 | 0.000000000 | 6                 | 8.320914822  | 3.106768962  | 0.000000000 |
| 6              | -6.883131000  | -2.933691000 | 0.000000000 | 6                 | 6.826172935  | 3.069108622  | 0.000000000 |
| 6              | -8.392254000  | -2.928737000 | 0.000000000 | 35                | 9.452058423  | 5.757919527  | 0.000000000 |
| 6              | -9.545950000  | -3.665282000 | 0.000000000 | 9                 | 11.922496487 | 1.213296267  | 0.000000000 |
| 6              | -10.748827000 | -2.902901000 | 0.000000000 | 1                 | 11.741435545 | -0.829254202 | 0.000000000 |
| 6              | -10.744256000 | -1.519117000 | 0.000000000 | 9                 | 11.963290985 | -3.327547468 | 0.000000000 |
| 1              | -11.702798000 | -3.423325000 | 0.000000000 | 35                | 9.695043498  | -5.361032799 | 0.000000000 |
| 1              | -11.702425000 | -1.011073000 | 0.000000000 | 35                | 5.859634133  | -5.476867817 | 0.000000000 |
| 1              | -5.734963000  | 4.808805000  | 0.000000000 | 6                 | 3.091351651  | -1.469394725 | 0.000000000 |
| 1              | -9.569338000  | -4.750750000 | 0.000000000 | 6                 | 3.125723333  | -2.883871078 | 0.000000000 |
| 6              | -3.062346000  | 2.949077000  | 0.000000000 | 6                 | 1.982757516  | -3.677928110 | 0.000000000 |
| 6              | -3.061853000  | 1.533520000  | 0.000000000 | 6                 | 0.809742759  | -2.931143551 | 0.000000000 |

|                |               |              |             |                   |               |              |             |
|----------------|---------------|--------------|-------------|-------------------|---------------|--------------|-------------|
| 6              | -1.907263000  | 0.733880000  | 0.000000000 | 6                 | 0.785239675   | -1.515395213 | 0.000000000 |
| 6              | -0.754084000  | 1.531592000  | 0.000000000 | 6                 | 1.921484691   | -0.694418161 | 0.000000000 |
| 6              | -0.754938000  | 2.948695000  | 0.000000000 | 6                 | 1.892505826   | 0.771394963  | 0.000000000 |
| 6              | -1.907254000  | 3.731559000  | 0.000000000 | 6                 | 3.031131526   | 1.593016182  | 0.000000000 |
| 6              | -3.061853000  | -1.533520000 | 0.000000000 | 6                 | 4.540218793   | 1.620204611  | 0.000000000 |
| 6              | -1.907263000  | -0.733880000 | 0.000000000 | 6                 | 5.651094233   | 3.823984364  | 0.000000000 |
| 6              | -0.754084000  | -1.531592000 | 0.000000000 | 6                 | 4.509214023   | 3.039421917  | 0.000000000 |
| 6              | -0.754938000  | -2.948695000 | 0.000000000 | 6                 | 3.007841568   | 3.007128714  | 0.000000000 |
| 6              | -1.907254000  | -3.731559000 | 0.000000000 | 35                | 5.629794029   | 5.710669273  | 0.000000000 |
| 6              | -3.062346000  | -2.949077000 | 0.000000000 | 6                 | 1.833307478   | 3.754988989  | 0.000000000 |
| 6              | -4.573341000  | -2.950290000 | 0.000000000 | 6                 | 0.691896900   | 2.962228539  | 0.000000000 |
| 1              | -1.906760000  | 4.816575000  | 0.000000000 | 6                 | 0.724847250   | 1.546027503  | 0.000000000 |
| 1              | -1.906760000  | -4.816575000 | 0.000000000 | 6                 | -0.809742759  | 2.931143551  | 0.000000000 |
| 1              | -5.734963000  | -4.808805000 | 0.000000000 | 6                 | -0.785239675  | 1.515395213  | 0.000000000 |
| 6              | 6.877950000   | 1.521744000  | 0.000000000 | 6                 | -0.724847250  | -1.546027503 | 0.000000000 |
| 6              | 0.754938000   | 2.948695000  | 0.000000000 | 6                 | -0.691896900  | -2.962228539 | 0.000000000 |
| 6              | 1.907254000   | 3.731559000  | 0.000000000 | 6                 | -1.982757516  | 3.677928110  | 0.000000000 |
| 6              | 0.754084000   | 1.531592000  | 0.000000000 | 6                 | -3.125723333  | 2.883871078  | 0.000000000 |
| 6              | 1.907263000   | 0.733880000  | 0.000000000 | 6                 | -1.921484691  | 0.694418161  | 0.000000000 |
| 6              | 3.061853000   | 1.533520000  | 0.000000000 | 6                 | -3.091351651  | 1.469394725  | 0.000000000 |
| 6              | 3.062346000   | 2.949077000  | 0.000000000 | 35                | -2.024537090  | 5.563861053  | 0.000000000 |
| 6              | 4.573341000   | 2.950290000  | 0.000000000 | 35                | 1.798229790   | 5.640961404  | 0.000000000 |
| 6              | 4.568494000   | 1.530223000  | 0.000000000 | 35                | 2.024537090   | -5.563861053 | 0.000000000 |
| 6              | 5.714313000   | 0.732224000  | 0.000000000 | 6                 | -1.833307478  | -3.754988989 | 0.000000000 |
| 6              | 6.883131000   | 2.933691000  | 0.000000000 | 6                 | -3.007841568  | -3.007128714 | 0.000000000 |
| 6              | 5.727664000   | 3.723717000  | 0.000000000 | 6                 | -3.031131526  | -1.593016182 | 0.000000000 |
| 1              | 1.906760000   | 4.816575000  | 0.000000000 | 6                 | -1.892505826  | -0.771394963 | 0.000000000 |
| 6              | 1.907263000   | -0.733880000 | 0.000000000 | 6                 | -4.540218793  | -1.620204611 | 0.000000000 |
| 6              | 3.061853000   | -1.533520000 | 0.000000000 | 6                 | -4.509214023  | -3.039421917 | 0.000000000 |
| 6              | 4.568494000   | -1.530223000 | 0.000000000 | 35                | -1.798229790  | -5.640961404 | 0.000000000 |
| 6              | 5.714313000   | -0.732224000 | 0.000000000 | 6                 | -4.627602969  | 2.854845509  | 0.000000000 |
| 6              | 6.877950000   | -1.521744000 | 0.000000000 | 6                 | -4.599892353  | 1.436081864  | 0.000000000 |
| 6              | 5.727664000   | -3.723717000 | 0.000000000 | 6                 | -5.728997969  | 0.614775243  | 0.000000000 |
| 6              | 4.573341000   | -2.950290000 | 0.000000000 | 6                 | -5.701784401  | -0.846725758 | 0.000000000 |
| 6              | 3.062346000   | -2.949077000 | 0.000000000 | 6                 | -5.651094233  | -3.823984364 | 0.000000000 |
| 6              | 1.907254000   | -3.731559000 | 0.000000000 | 6                 | -6.826172935  | -3.069108622 | 0.000000000 |
| 6              | 0.754938000   | -2.948695000 | 0.000000000 | 6                 | -6.849748267  | -1.659216124 | 0.000000000 |
| 6              | 0.754084000   | -1.531592000 | 0.000000000 | 6                 | -6.908152258  | 1.377977525  | 0.000000000 |
| 1              | 5.734963000   | 4.808805000  | 0.000000000 | 6                 | -6.944330045  | 2.788336529  | 0.000000000 |
| 1              | 1.906760000   | -4.816575000 | 0.000000000 | 6                 | -5.802489482  | 3.591123127  | 0.000000000 |
| 6              | 6.883131000   | -2.933691000 | 0.000000000 | 35                | -5.859634133  | 5.476867817  | 0.000000000 |
| 1              | 5.734963000   | -4.808805000 | 0.000000000 | 6                 | -8.440636836  | 2.755962693  | 0.000000000 |
| 6              | 8.392254000   | 2.928737000  | 0.000000000 | 6                 | -8.419057655  | 1.330020282  | 0.000000000 |
| 6              | 9.545950000   | 3.665282000  | 0.000000000 | 6                 | -9.561294002  | 0.549161504  | 0.000000000 |
| 6              | 8.387546000   | 1.505391000  | 0.000000000 | 6                 | -9.529782700  | -0.931593782 | 0.000000000 |
| 6              | 9.537888000   | 0.739808000  | 0.000000000 | 6                 | -8.365623790  | -1.681673501 | 0.000000000 |
| 6              | 10.744256000  | 1.519117000  | 0.000000000 | 6                 | -8.320914822  | -3.106768962 | 0.000000000 |
| 6              | 10.748827000  | 2.902901000  | 0.000000000 | 6                 | -9.455462566  | -3.865140058 | 0.000000000 |
| 1              | 9.569338000   | 4.750750000  | 0.000000000 | 6                 | -10.682603409 | -3.156847618 | 0.000000000 |
| 6              | 9.537888000   | -0.739808000 | 0.000000000 | 6                 | -10.694250488 | -1.779524939 | 0.000000000 |
| 6              | 10.744256000  | -1.519117000 | 0.000000000 | 9                 | -11.922496487 | -1.213296267 | 0.000000000 |
| 6              | 10.748827000  | -2.902901000 | 0.000000000 | 1                 | -11.629905884 | -3.682337938 | 0.000000000 |
| 6              | 9.545950000   | -3.665282000 | 0.000000000 | 35                | -9.452058423  | -5.757919527 | 0.000000000 |
| 6              | 8.392254000   | -2.928737000 | 0.000000000 | 35                | -5.629794029  | -5.710669273 | 0.000000000 |
| 6              | 8.387546000   | -1.505391000 | 0.000000000 | 6                 | -9.598815981  | 3.478093341  | 0.000000000 |
| 1              | 9.569338000   | -4.750750000 | 0.000000000 | 6                 | -10.781989106 | 2.690135652  | 0.000000000 |
| 1              | 11.702425000  | 1.011073000  | 0.000000000 | 6                 | -10.778380350 | 1.314012463  | 0.000000000 |
| 1              | 11.702798000  | 3.423325000  | 0.000000000 | 1                 | -11.741435545 | 0.829254202  | 0.000000000 |
| 1              | 11.702425000  | -1.011073000 | 0.000000000 | 9                 | -11.963290985 | 3.327547468  | 0.000000000 |
| 1              | 11.702798000  | -3.423325000 | 0.000000000 | 35                | -9.695043498  | 5.361032799  | 0.000000000 |
| <b>2_4Bp_H</b> |               |              |             | <b>2_4Bp_F_Br</b> |               |              |             |
| 6              | -8.385273000  | 1.530167000  | 0.000000000 | 6                 | -6.764046538  | -1.545723609 | 0.000000000 |
| 6              | -14.565867000 | 2.902542000  | 0.000000000 | 6                 | 14.351670958  | 3.100689583  | 0.000000000 |
| 6              | -13.362772000 | 3.665285000  | 0.000000000 | 6                 | 13.140132448  | 3.811529316  | 0.000000000 |
| 6              | -14.561202000 | 1.518966000  | 0.000000000 | 6                 | 11.992472470  | 3.053566302  | 0.000000000 |
| 6              | -13.354503000 | 0.739664000  | 0.000000000 | 6                 | 12.028606560  | 1.627049279  | 0.000000000 |
| 6              | -12.204388000 | 1.505387000  | 0.000000000 | 6                 | 13.202900260  | 0.873016310  | 0.000000000 |
| 6              | -12.209186000 | 2.928852000  | 0.000000000 | 6                 | 14.357112290  | 1.713338387  | 0.000000000 |
| 6              | -10.699933000 | 2.933470000  | 0.000000000 | 1                 | 15.304437857  | 3.616476399  | 0.000000000 |
| 6              | -10.694784000 | 1.521976000  | 0.000000000 | 35                | 13.145632324  | 5.701517029  | 0.000000000 |
| 6              | -9.530729000  | 0.732034000  | 0.000000000 | 9                 | 15.587772679  | 1.156163966  | 0.000000000 |
| 6              | -8.390175000  | 2.950536000  | 0.000000000 | 6                 | 13.239345833  | -0.607174825 | 0.000000000 |
| 6              | -9.544201000  | 3.723936000  | 0.000000000 | 6                 | 14.455596322  | -1.371577493 | 0.000000000 |

|   |               |              |             |    |              |              |             |
|---|---------------|--------------|-------------|----|--------------|--------------|-------------|
| 1 | -13.386508000 | 4.750726000  | 0.000000000 | 6  | 14.458148184 | -2.748722120 | 0.000000000 |
| 1 | -15.519818000 | 3.423051000  | 0.000000000 | 6  | 13.275357866 | -3.536075539 | 0.000000000 |
| 1 | -15.519393000 | 1.010816000  | 0.000000000 | 6  | 12.116853246 | -2.812578391 | 0.000000000 |
| 6 | -13.354503000 | -0.739664000 | 0.000000000 | 6  | 12.097409782 | -1.387334276 | 0.000000000 |
| 6 | -12.204388000 | -1.505387000 | 0.000000000 | 6  | 10.589180652 | -1.429606214 | 0.000000000 |
| 6 | -10.694784000 | -1.521976000 | 0.000000000 | 6  | 10.621311208 | -2.842930245 | 0.000000000 |
| 6 | -9.530729000  | -0.732034000 | 0.000000000 | 9  | 15.639293597 | -3.385204069 | 0.000000000 |
| 6 | -8.385273000  | -1.530167000 | 0.000000000 | 1  | 15.419491542 | -0.888569014 | 0.000000000 |
| 6 | -9.544201000  | -3.723936000 | 0.000000000 | 35 | 13.369794055 | -5.418283546 | 0.000000000 |
| 6 | -10.699933000 | -2.933470000 | 0.000000000 | 6  | 10.514997512 | 3.049636830  | 0.000000000 |
| 6 | -12.209186000 | -2.928852000 | 0.000000000 | 6  | 10.528035631 | 1.597060089  | 0.000000000 |
| 6 | -13.362772000 | -3.665285000 | 0.000000000 | 6  | 9.397249159  | 0.802327638  | 0.000000000 |
| 6 | -14.565867000 | -2.902542000 | 0.000000000 | 6  | 9.417767396  | -0.660572539 | 0.000000000 |
| 6 | -14.561202000 | -1.518966000 | 0.000000000 | 6  | 9.374581892  | 3.808898587  | 0.000000000 |
| 1 | -15.519818000 | -3.423051000 | 0.000000000 | 6  | 8.194864502  | 3.032481792  | 0.000000000 |
| 1 | -15.519393000 | -1.010816000 | 0.000000000 | 6  | 8.209920368  | 1.586707305  | 0.000000000 |
| 1 | -9.551625000  | 4.808991000  | 0.000000000 | 6  | 6.759465492  | 3.059823749  | 0.000000000 |
| 1 | -13.386508000 | -4.750726000 | 0.000000000 | 6  | 6.764046538  | 1.545723609  | 0.000000000 |
| 6 | -6.879082000  | 2.948772000  | 0.000000000 | 35 | 9.367368057  | 5.694828180  | 0.000000000 |
| 6 | -6.878691000  | 1.533884000  | 0.000000000 | 6  | 8.285452751  | -1.478491985 | 0.000000000 |
| 6 | -5.723584000  | 0.733518000  | 0.000000000 | 6  | 8.305797552  | -2.901419529 | 0.000000000 |
| 6 | -4.570821000  | 1.531199000  | 0.000000000 | 6  | 9.479833968  | -3.642696633 | 0.000000000 |
| 6 | -4.571770000  | 2.948725000  | 0.000000000 | 6  | 6.788118361  | -1.499451751 | 0.000000000 |
| 6 | -5.723406000  | 3.731658000  | 0.000000000 | 6  | 6.812168296  | -2.926960682 | 0.000000000 |
| 6 | -6.878691000  | -1.533884000 | 0.000000000 | 35 | 9.532297283  | -5.527615188 | 0.000000000 |
| 6 | -5.723584000  | -0.733518000 | 0.000000000 | 6  | 5.619742874  | 3.817300976  | 0.000000000 |
| 6 | -4.570821000  | -1.531199000 | 0.000000000 | 6  | 4.439435817  | 3.049349317  | 0.000000000 |
| 6 | -4.571770000  | -2.948725000 | 0.000000000 | 6  | 4.447576403  | 1.536540131  | 0.000000000 |
| 6 | -5.723406000  | -3.731658000 | 0.000000000 | 6  | 5.635166752  | 0.751256771  | 0.000000000 |
| 6 | -6.879082000  | -2.948772000 | 0.000000000 | 35 | 5.608768808  | 5.707632676  | 0.000000000 |
| 6 | -8.390175000  | -2.950536000 | 0.000000000 | 6  | 5.640180396  | -0.710969530 | 0.000000000 |
| 1 | -5.722859000  | 4.816616000  | 0.000000000 | 6  | 5.670296313  | -3.709514841 | 0.000000000 |
| 1 | -5.722859000  | -4.816616000 | 0.000000000 | 6  | 4.496748775  | -2.949162031 | 0.000000000 |
| 1 | -9.551625000  | -4.808991000 | 0.000000000 | 6  | 4.486159722  | -1.521397264 | 0.000000000 |
| 6 | 3.062730000   | 1.531893000  | 0.000000000 | 6  | 3.006753166  | -1.518664386 | 0.000000000 |
| 6 | -3.061736000  | 2.947417000  | 0.000000000 | 6  | 3.022179723  | -2.979061190 | 0.000000000 |
| 6 | -1.907882000  | 3.730570000  | 0.000000000 | 6  | 3.046394860  | 3.044640322  | 0.000000000 |
| 6 | -3.062730000  | 1.531893000  | 0.000000000 | 6  | 3.052084561  | 1.524459692  | 0.000000000 |
| 6 | -1.908118000  | 0.732966000  | 0.000000000 | 6  | 1.862475374  | 3.800987813  | 0.000000000 |
| 6 | -0.754067000  | 1.531258000  | 0.000000000 | 6  | 0.729053135  | 3.028626365  | 0.000000000 |
| 6 | -0.754957000  | 2.947529000  | 0.000000000 | 6  | 0.738795495  | 1.517850276  | 0.000000000 |
| 6 | 0.754957000   | 2.947529000  | 0.000000000 | 6  | 1.875251494  | 0.728737187  | 0.000000000 |
| 6 | 0.754067000   | 1.531258000  | 0.000000000 | 6  | 1.872097185  | -0.729550225 | 0.000000000 |
| 6 | 1.908118000   | 0.732966000  | 0.000000000 | 6  | 1.891894409  | -3.753582858 | 0.000000000 |
| 6 | 3.061736000   | 2.947417000  | 0.000000000 | 6  | 0.704231281  | -2.987989115 | 0.000000000 |
| 6 | 1.907882000   | 3.730570000  | 0.000000000 | 6  | 0.697703117  | -1.538363606 | 0.000000000 |
| 1 | -1.907852000  | 4.815497000  | 0.000000000 | 6  | -0.704231281 | 2.987989115  | 0.000000000 |
| 6 | -1.908118000  | -0.732966000 | 0.000000000 | 6  | -0.697703117 | 1.538363606  | 0.000000000 |
| 6 | -0.754067000  | -1.531258000 | 0.000000000 | 35 | 1.851375134  | 5.691948886  | 0.000000000 |
| 6 | 0.754067000   | -1.531258000 | 0.000000000 | 6  | -0.738795495 | -1.517850276 | 0.000000000 |
| 6 | 1.908118000   | -0.732966000 | 0.000000000 | 6  | -0.729053135 | -3.028626365 | 0.000000000 |
| 6 | 3.062730000   | -1.531893000 | 0.000000000 | 35 | 5.698457013  | -5.594967871 | 0.000000000 |
| 6 | 1.907882000   | -3.730570000 | 0.000000000 | 35 | 1.905274744  | -5.639794381 | 0.000000000 |
| 6 | 0.754957000   | -2.947529000 | 0.000000000 | 6  | -1.891894409 | 3.753582858  | 0.000000000 |
| 6 | -0.754957000  | -2.947529000 | 0.000000000 | 6  | -3.022179723 | 2.979061190  | 0.000000000 |
| 6 | -1.907882000  | -3.730570000 | 0.000000000 | 6  | -3.006753166 | 1.518664386  | 0.000000000 |
| 6 | -3.061736000  | -2.947417000 | 0.000000000 | 6  | -1.872097185 | 0.729550225  | 0.000000000 |
| 6 | -3.062730000  | -1.531893000 | 0.000000000 | 6  | -1.875251494 | -0.728737187 | 0.000000000 |
| 1 | 1.907852000   | 4.815497000  | 0.000000000 | 6  | -3.052084561 | -1.524459692 | 0.000000000 |
| 1 | -1.907852000  | -4.815497000 | 0.000000000 | 6  | -3.046394860 | -3.044640322 | 0.000000000 |
| 6 | 3.061736000   | -2.947417000 | 0.000000000 | 6  | -1.862475374 | -3.800987813 | 0.000000000 |
| 1 | 1.907852000   | -4.815497000 | 0.000000000 | 35 | -1.905274744 | 5.639794381  | 0.000000000 |
| 6 | 10.694784000  | 1.521976000  | 0.000000000 | 6  | -4.496748775 | 2.949162031  | 0.000000000 |
| 6 | 4.571770000   | 2.948725000  | 0.000000000 | 6  | -4.486159722 | 1.521397264  | 0.000000000 |
| 6 | 5.723406000   | 3.731658000  | 0.000000000 | 6  | -5.640180396 | 0.710969530  | 0.000000000 |
| 6 | 4.570821000   | 1.531199000  | 0.000000000 | 6  | -5.635166752 | -0.751256771 | 0.000000000 |
| 6 | 5.723584000   | 0.733518000  | 0.000000000 | 6  | -4.447576403 | -1.536540131 | 0.000000000 |
| 6 | 6.878691000   | 1.533884000  | 0.000000000 | 6  | -4.439435817 | -3.049349317 | 0.000000000 |
| 6 | 6.879082000   | 2.948772000  | 0.000000000 | 35 | -1.851375134 | -5.691948886 | 0.000000000 |
| 6 | 8.390175000   | 2.950536000  | 0.000000000 | 6  | -5.619742874 | -3.817300976 | 0.000000000 |
| 6 | 8.385273000   | 1.530167000  | 0.000000000 | 6  | -6.759465492 | -3.059823749 | 0.000000000 |
| 6 | 9.530729000   | 0.732034000  | 0.000000000 | 35 | -5.608768808 | -5.707632676 | 0.000000000 |
| 6 | 10.699933000  | 2.933470000  | 0.000000000 | 6  | -8.209920368 | -1.586707305 | 0.000000000 |
| 6 | 9.544201000   | 3.723936000  | 0.000000000 | 6  | -8.194864502 | -3.032481792 | 0.000000000 |



|                   |               |              |             |
|-------------------|---------------|--------------|-------------|
| 1                 | 5.722859000   | 4.816616000  | 0.000000000 |
| 6                 | 5.723584000   | -0.733518000 | 0.000000000 |
| 6                 | 6.878691000   | -1.533884000 | 0.000000000 |
| 6                 | 8.385273000   | -1.530167000 | 0.000000000 |
| 6                 | 9.530729000   | -0.732034000 | 0.000000000 |
| 6                 | 10.694784000  | -1.521976000 | 0.000000000 |
| 6                 | 9.544201000   | -3.723936000 | 0.000000000 |
| 6                 | 8.390175000   | -2.950536000 | 0.000000000 |
| 6                 | 6.879082000   | -2.948772000 | 0.000000000 |
| 6                 | 5.723406000   | -3.731658000 | 0.000000000 |
| 6                 | 4.571770000   | -2.948725000 | 0.000000000 |
| 6                 | 4.570821000   | -1.531199000 | 0.000000000 |
| 1                 | 9.551625000   | 4.808991000  | 0.000000000 |
| 1                 | 5.722859000   | -4.816616000 | 0.000000000 |
| 6                 | 12.209186000  | 2.928852000  | 0.000000000 |
| 6                 | 12.204388000  | 1.505387000  | 0.000000000 |
| 6                 | 13.354503000  | 0.739664000  | 0.000000000 |
| 6                 | 14.561202000  | 1.518966000  | 0.000000000 |
| 6                 | 14.565867000  | 2.902542000  | 0.000000000 |
| 6                 | 13.362772000  | 3.665285000  | 0.000000000 |
| 6                 | 12.204388000  | -1.505387000 | 0.000000000 |
| 6                 | 13.354503000  | -0.739664000 | 0.000000000 |
| 6                 | 14.561202000  | -1.518966000 | 0.000000000 |
| 6                 | 14.565867000  | -2.902542000 | 0.000000000 |
| 6                 | 13.362772000  | -3.665285000 | 0.000000000 |
| 6                 | 12.209186000  | -2.928852000 | 0.000000000 |
| 6                 | 10.699933000  | -2.933470000 | 0.000000000 |
| 1                 | 13.386508000  | 4.750726000  | 0.000000000 |
| 1                 | 13.386508000  | -4.750726000 | 0.000000000 |
| 1                 | 9.551625000   | -4.808991000 | 0.000000000 |
| 1                 | 15.519393000  | 1.010816000  | 0.000000000 |
| 1                 | 15.519818000  | 3.423051000  | 0.000000000 |
| 1                 | 15.519393000  | -1.010816000 | 0.000000000 |
| 1                 | 15.519818000  | -3.423051000 | 0.000000000 |
| <b>2_5Bp_H</b>    |               |              |             |
| 6                 | -12.201819000 | 1.530110000  | 0.000000000 |
| 6                 | -18.382457000 | 2.902556000  | 0.000000000 |
| 6                 | -17.179268000 | 3.665342000  | 0.000000000 |
| 6                 | -18.377808000 | 1.519075000  | 0.000000000 |
| 6                 | -17.171026000 | 0.739659000  | 0.000000000 |
| 6                 | -16.020920000 | 1.505373000  | 0.000000000 |
| 6                 | -16.025744000 | 2.928950000  | 0.000000000 |
| 6                 | -14.516523000 | 2.933480000  | 0.000000000 |
| 6                 | -14.511404000 | 1.522049000  | 0.000000000 |
| 6                 | -13.347279000 | 0.731989000  | 0.000000000 |
| 6                 | -12.206744000 | 2.950560000  | 0.000000000 |
| 6                 | -13.360694000 | 3.723952000  | 0.000000000 |
| 1                 | -17.203123000 | 4.750788000  | 0.000000000 |
| 1                 | -19.336372000 | 3.423158000  | 0.000000000 |
| 1                 | -19.335986000 | 1.010910000  | 0.000000000 |
| 6                 | -17.171026000 | -0.739659000 | 0.000000000 |
| 6                 | -16.020920000 | -1.505373000 | 0.000000000 |
| 6                 | -14.511404000 | -1.522049000 | 0.000000000 |
| 6                 | -13.347279000 | -0.731989000 | 0.000000000 |
| 6                 | -12.201819000 | -1.530110000 | 0.000000000 |
| 6                 | -13.360694000 | -3.723952000 | 0.000000000 |
| 6                 | -14.516523000 | -2.933480000 | 0.000000000 |
| 6                 | -16.025744000 | -2.928950000 | 0.000000000 |
| 6                 | -17.179268000 | -3.665342000 | 0.000000000 |
| 6                 | -18.382457000 | -2.902556000 | 0.000000000 |
| 6                 | -18.377808000 | -1.519075000 | 0.000000000 |
| 1                 | -19.336372000 | -3.423158000 | 0.000000000 |
| 1                 | -19.335986000 | -1.010910000 | 0.000000000 |
| 1                 | -13.368078000 | 4.809013000  | 0.000000000 |
| 1                 | -17.203123000 | -4.750788000 | 0.000000000 |
| 6                 | -10.695687000 | 2.948708000  | 0.000000000 |
| 6                 | -10.695307000 | 1.533931000  | 0.000000000 |
| 6                 | -9.540055000  | 0.733443000  | 0.000000000 |
| 6                 | -8.387355000  | 1.531137000  | 0.000000000 |
| 6                 | -8.388368000  | 2.948800000  | 0.000000000 |
| 6                 | -9.539893000  | 3.731688000  | 0.000000000 |
| 6                 | -10.695307000 | -1.533931000 | 0.000000000 |
| 6                 | -9.540055000  | -0.733443000 | 0.000000000 |
| 6                 | -8.387355000  | -1.531137000 | 0.000000000 |
| 6                 | -5.670296313  | 3.709514841  | 0.000000000 |
| 6                 | -6.812168296  | 2.926960682  | 0.000000000 |
| 6                 | -6.788118361  | 1.499451751  | 0.000000000 |
| 35                | -5.698457013  | 5.594967871  | 0.000000000 |
| 6                 | -8.305797552  | 2.901419529  | 0.000000000 |
| 6                 | -8.285452751  | 1.478491985  | 0.000000000 |
| 6                 | -9.479833968  | 3.642696633  | 0.000000000 |
| 6                 | -10.621311208 | 2.842930245  | 0.000000000 |
| 6                 | -10.589180652 | 1.429606214  | 0.000000000 |
| 6                 | -9.417767396  | 0.660572539  | 0.000000000 |
| 35                | -9.532297283  | 5.527615188  | 0.000000000 |
| 6                 | -12.116853246 | 2.812578391  | 0.000000000 |
| 6                 | -12.097409782 | 1.387334276  | 0.000000000 |
| 6                 | -9.397249159  | -0.802327638 | 0.000000000 |
| 6                 | -9.374581892  | -3.808898587 | 0.000000000 |
| 6                 | -10.514997512 | -3.049636830 | 0.000000000 |
| 6                 | -10.528035631 | -1.597060089 | 0.000000000 |
| 35                | -9.367368057  | -5.694828180 | 0.000000000 |
| 6                 | -11.992472470 | -3.053566302 | 0.000000000 |
| 6                 | -12.028606560 | -1.627049279 | 0.000000000 |
| 6                 | -13.239345833 | 0.607174825  | 0.000000000 |
| 6                 | -13.202900260 | -0.873016310 | 0.000000000 |
| 6                 | -13.275357866 | 3.536075539  | 0.000000000 |
| 6                 | -14.458148184 | 2.748722120  | 0.000000000 |
| 6                 | -14.455596322 | 1.371577493  | 0.000000000 |
| 6                 | -14.357112290 | -1.713338387 | 0.000000000 |
| 6                 | -14.351670958 | -3.100689583 | 0.000000000 |
| 6                 | -13.140132448 | -3.811529316 | 0.000000000 |
| 9                 | -15.639293597 | 3.385204069  | 0.000000000 |
| 35                | -13.369794055 | 5.418283546  | 0.000000000 |
| 1                 | -15.419491542 | 0.888569014  | 0.000000000 |
| 9                 | -15.587772679 | -1.156163966 | 0.000000000 |
| 1                 | -15.304437857 | -3.616476399 | 0.000000000 |
| 35                | -13.145632324 | -5.701517029 | 0.000000000 |
| <b>2_5Bp_F_Br</b> |               |              |             |
| 6                 | 18.364822607  | 3.038532834  | 0.000000000 |
| 6                 | 18.356366953  | 1.661424467  | 0.000000000 |
| 6                 | 17.179286733  | 0.830583149  | 0.000000000 |
| 6                 | 17.189128597  | -0.650321726 | 0.000000000 |
| 6                 | 18.395340414  | -1.432760029 | 0.000000000 |
| 6                 | 18.379108272  | -2.808444704 | 0.000000000 |
| 6                 | 17.184292209  | -3.579391192 | 0.000000000 |
| 6                 | 16.036778819  | -2.840849079 | 0.000000000 |
| 6                 | 16.035834733  | -1.414449795 | 0.000000000 |
| 6                 | 14.524512812  | -1.440559615 | 0.000000000 |
| 6                 | 14.540047495  | -2.850838018 | 0.000000000 |
| 6                 | 13.356151899  | -0.659933047 | 0.000000000 |
| 6                 | 13.350365458  | 0.801617598  | 0.000000000 |
| 6                 | 14.510465832  | 1.597482391  | 0.000000000 |
| 6                 | 16.026340598  | 1.597601472  | 0.000000000 |
| 6                 | 17.147944817  | 3.764824070  | 0.000000000 |
| 6                 | 16.002500091  | 3.023444012  | 0.000000000 |
| 6                 | 14.507390871  | 3.007268401  | 0.000000000 |
| 6                 | 13.343291194  | 3.779375952  | 0.000000000 |
| 6                 | 12.190222907  | 3.011859008  | 0.000000000 |
| 6                 | 12.200479973  | 1.592044108  | 0.000000000 |
| 6                 | 12.215412911  | -1.464499552 | 0.000000000 |
| 6                 | 12.222357782  | -2.883899623 | 0.000000000 |
| 6                 | 13.386050699  | -3.636964028 | 0.000000000 |
| 35                | 13.415768715  | -5.523567283 | 0.000000000 |
| 35                | 17.253464380  | -5.463800816 | 0.000000000 |
| 9                 | 19.551123275  | -3.462966627 | 0.000000000 |
| 1                 | 19.365034414  | -0.961469017 | 0.000000000 |
| 9                 | 19.576158380  | 1.076943247  | 0.000000000 |
| 1                 | 19.319621764  | 3.550250148  | 0.000000000 |
| 35                | 17.173162050  | 5.657692295  | 0.000000000 |
| 35                | 13.350683511  | 5.666396662  | 0.000000000 |
| 6                 | 10.688525041  | 3.000997301  | 0.000000000 |
| 6                 | 10.691199901  | 1.587373165  | 0.000000000 |
| 6                 | 9.524602657   | 3.766299680  | 0.000000000 |
| 6                 | 8.372219278   | 2.990703179  | 0.000000000 |
| 6                 | 8.384201957   | 1.573667265  | 0.000000000 |
| 6                 | 9.540000186   | 0.782148403  | 0.000000000 |
| 6                 | 9.547449214   | -0.683367674 | 0.000000000 |

|   |               |              |             |    |               |              |             |
|---|---------------|--------------|-------------|----|---------------|--------------|-------------|
| 6 | -8.388368000  | -2.948800000 | 0.000000000 | 6  | 10.706605730  | -1.476090136 | 0.000000000 |
| 6 | -9.539893000  | -3.731688000 | 0.000000000 | 6  | 10.719937091  | -2.889976014 | 0.000000000 |
| 6 | -10.695687000 | -2.948708000 | 0.000000000 | 6  | 9.564316022   | -3.667183327 | 0.000000000 |
| 6 | -12.206744000 | -2.950560000 | 0.000000000 | 6  | 8.403202245   | -2.903533406 | 0.000000000 |
| 1 | -9.539363000  | 4.816649000  | 0.000000000 | 6  | 8.399653756   | -1.486897759 | 0.000000000 |
| 1 | -9.539363000  | -4.816649000 | 0.000000000 | 6  | 6.873610961   | 1.566278487  | 0.000000000 |
| 1 | -13.368078000 | -4.809013000 | 0.000000000 | 6  | 5.723329096   | 0.761663493  | 0.000000000 |
| 6 | -0.753931000  | 1.531452000  | 0.000000000 | 6  | 5.730903990   | -0.703247922 | 0.000000000 |
| 6 | -6.878366000  | 2.947302000  | 0.000000000 | 6  | 6.889261614   | -1.495607523 | 0.000000000 |
| 6 | -5.724320000  | 3.730677000  | 0.000000000 | 6  | 6.900904000   | -2.910081167 | 0.000000000 |
| 6 | -6.879390000  | 1.532001000  | 0.000000000 | 6  | 5.746200911   | -3.686703712 | 0.000000000 |
| 6 | -5.724498000  | 0.732848000  | 0.000000000 | 6  | 4.584543485   | -2.922351600 | 0.000000000 |
| 6 | -4.570648000  | 1.531206000  | 0.000000000 | 6  | 4.581588999   | -1.506871889 | 0.000000000 |
| 6 | -4.571608000  | 2.947740000  | 0.000000000 | 6  | 6.870318915   | 2.980515432  | 0.000000000 |
| 6 | -3.061685000  | 2.947273000  | 0.000000000 | 6  | 5.707476923   | 3.745359407  | 0.000000000 |
| 6 | -3.062737000  | 1.531556000  | 0.000000000 | 6  | 4.554270336   | 2.969029627  | 0.000000000 |
| 6 | -1.908167000  | 0.732669000  | 0.000000000 | 6  | 4.566027618   | 1.553226560  | 0.000000000 |
| 6 | -0.754991000  | 2.947487000  | 0.000000000 | 6  | 3.052261613   | 2.960646342  | 0.000000000 |
| 6 | -1.908195000  | 3.730612000  | 0.000000000 | 6  | 3.055338892   | 1.545978277  | 0.000000000 |
| 1 | -5.724409000  | 4.815603000  | 0.000000000 | 6  | 1.905294824   | 0.741981525  | 0.000000000 |
| 6 | -5.724498000  | -0.732848000 | 0.000000000 | 6  | 1.912862002   | -0.722598926 | 0.000000000 |
| 6 | -4.570648000  | -1.531206000 | 0.000000000 | 6  | 3.070898318   | -1.514707190 | 0.000000000 |
| 6 | -3.062737000  | -1.531556000 | 0.000000000 | 6  | 3.082351677   | -2.929561819 | 0.000000000 |
| 6 | -1.908167000  | -0.732669000 | 0.000000000 | 35 | 5.757091973   | -5.573364602 | 0.000000000 |
| 6 | -0.753931000  | -1.531452000 | 0.000000000 | 35 | 9.579037893   | -5.553797350 | 0.000000000 |
| 6 | -1.908195000  | -3.730612000 | 0.000000000 | 35 | 9.518983136   | 5.652869906  | 0.000000000 |
| 6 | -3.061685000  | -2.947273000 | 0.000000000 | 35 | 5.698935818   | 5.632034484  | 0.000000000 |
| 6 | -4.571608000  | -2.947740000 | 0.000000000 | 6  | 1.889995711   | 3.725474304  | 0.000000000 |
| 6 | -5.724320000  | -3.730677000 | 0.000000000 | 6  | 0.736088880   | 2.949189893  | 0.000000000 |
| 6 | -6.878366000  | -2.947302000 | 0.000000000 | 6  | 0.747596940   | 1.534007543  | 0.000000000 |
| 6 | -6.879390000  | -1.532001000 | 0.000000000 | 6  | -0.763103012  | 1.526417197  | 0.000000000 |
| 1 | -1.908265000  | 4.815529000  | 0.000000000 | 6  | 0.763103012   | -1.526417197 | 0.000000000 |
| 1 | -5.724409000  | -4.815603000 | 0.000000000 | 6  | 0.766098838   | -2.941383688 | 0.000000000 |
| 6 | -0.754991000  | -2.947487000 | 0.000000000 | 6  | 1.928096695   | -3.706011038 | 0.000000000 |
| 1 | -1.908265000  | -4.815529000 | 0.000000000 | 6  | -0.747596940  | -1.534007543 | 0.000000000 |
| 6 | 6.879390000   | 1.532001000  | 0.000000000 | 6  | -0.736088880  | -2.949189893 | 0.000000000 |
| 6 | 0.754991000   | 2.947487000  | 0.000000000 | 6  | -1.889995711  | -3.725474304 | 0.000000000 |
| 6 | 1.908195000   | 3.730612000  | 0.000000000 | 6  | -3.052261613  | -2.960646342 | 0.000000000 |
| 6 | 0.753931000   | 1.531452000  | 0.000000000 | 6  | -3.055338892  | -1.545978277 | 0.000000000 |
| 6 | 1.908167000   | 0.732669000  | 0.000000000 | 6  | -1.905294824  | -0.741981525 | 0.000000000 |
| 6 | 3.062737000   | 1.531556000  | 0.000000000 | 6  | -1.912862002  | 0.722598926  | 0.000000000 |
| 6 | 3.061685000   | 2.947273000  | 0.000000000 | 6  | -0.766098838  | 2.941383688  | 0.000000000 |
| 6 | 4.571608000   | 2.947740000  | 0.000000000 | 6  | -1.928096695  | 3.706011038  | 0.000000000 |
| 6 | 4.570648000   | 1.531206000  | 0.000000000 | 6  | -3.082351677  | 2.929561819  | 0.000000000 |
| 6 | 5.724498000   | 0.732848000  | 0.000000000 | 6  | -3.070898318  | 1.514707190  | 0.000000000 |
| 6 | 6.878366000   | 2.947302000  | 0.000000000 | 6  | -4.581588999  | 1.506871889  | 0.000000000 |
| 6 | 5.724320000   | 3.730677000  | 0.000000000 | 6  | -5.730903990  | 0.703247922  | 0.000000000 |
| 1 | 1.908265000   | 4.815529000  | 0.000000000 | 6  | -5.723329096  | -0.761663493 | 0.000000000 |
| 6 | 1.908167000   | -0.732669000 | 0.000000000 | 6  | -4.566027618  | -1.553226560 | 0.000000000 |
| 6 | 3.062737000   | -1.531556000 | 0.000000000 | 6  | -4.554270336  | -2.969029627 | 0.000000000 |
| 6 | 4.570648000   | -1.531206000 | 0.000000000 | 35 | -1.880628484  | -5.612171097 | 0.000000000 |
| 6 | 5.724498000   | -0.732848000 | 0.000000000 | 35 | 1.937957020   | -5.592725274 | 0.000000000 |
| 6 | 6.879390000   | -1.532001000 | 0.000000000 | 35 | 1.880628484   | 5.612171097  | 0.000000000 |
| 6 | 5.724320000   | -3.730677000 | 0.000000000 | 35 | -1.937957020  | 5.592725274  | 0.000000000 |
| 6 | 4.571608000   | -2.947740000 | 0.000000000 | 6  | -4.584543485  | 2.922351600  | 0.000000000 |
| 6 | 3.061685000   | -2.947273000 | 0.000000000 | 6  | -5.746200911  | 3.686703712  | 0.000000000 |
| 6 | 1.908195000   | -3.730612000 | 0.000000000 | 6  | -6.900904000  | 2.910081167  | 0.000000000 |
| 6 | 0.754991000   | -2.947487000 | 0.000000000 | 6  | -6.889261614  | 1.495607523  | 0.000000000 |
| 6 | 0.753931000   | -1.531452000 | 0.000000000 | 6  | -8.403202245  | 2.903533406  | 0.000000000 |
| 1 | 5.724409000   | 4.815603000  | 0.000000000 | 6  | -8.399653756  | 1.486897759  | 0.000000000 |
| 1 | 1.908265000   | -4.815529000 | 0.000000000 | 6  | -9.564316022  | 3.667183327  | 0.000000000 |
| 6 | 8.388368000   | 2.948800000  | 0.000000000 | 6  | -10.719937091 | 2.889976014  | 0.000000000 |
| 6 | 8.387355000   | 1.531137000  | 0.000000000 | 6  | -10.706605730 | 1.476090136  | 0.000000000 |
| 6 | 9.540055000   | 0.733443000  | 0.000000000 | 6  | -9.547449214  | 0.683367674  | 0.000000000 |
| 6 | 10.695307000  | 1.533931000  | 0.000000000 | 6  | -12.222357782 | 2.883899623  | 0.000000000 |
| 6 | 10.695687000  | 2.948708000  | 0.000000000 | 6  | -12.215412911 | 1.464499552  | 0.000000000 |
| 6 | 9.539893000   | 3.731688000  | 0.000000000 | 6  | -13.386050699 | 3.636964028  | 0.000000000 |
| 6 | 8.387355000   | -1.531137000 | 0.000000000 | 6  | -14.540047495 | 2.850838018  | 0.000000000 |
| 6 | 9.540055000   | -0.733443000 | 0.000000000 | 6  | -14.524512812 | 1.440559615  | 0.000000000 |
| 6 | 10.695307000  | -1.533931000 | 0.000000000 | 6  | -13.356151899 | 0.659933047  | 0.000000000 |
| 6 | 10.695687000  | -2.948708000 | 0.000000000 | 6  | -16.036778819 | 2.840849079  | 0.000000000 |
| 6 | 9.539893000   | -3.731688000 | 0.000000000 | 6  | -16.035834733 | 1.414449795  | 0.000000000 |
| 6 | 8.388368000   | -2.948800000 | 0.000000000 | 6  | -17.184292209 | 3.579391192  | 0.000000000 |
| 6 | 6.878366000   | -2.947302000 | 0.000000000 | 6  | -18.379108272 | 2.808444704  | 0.000000000 |

|   |              |              |             |    |               |              |             |
|---|--------------|--------------|-------------|----|---------------|--------------|-------------|
| 1 | 9.539363000  | 4.816649000  | 0.000000000 | 6  | -18.395340414 | 1.432760029  | 0.000000000 |
| 1 | 9.539363000  | -4.816649000 | 0.000000000 | 6  | -17.189128597 | 0.650321726  | 0.000000000 |
| 1 | 5.724409000  | -4.815603000 | 0.000000000 | 9  | -19.551123275 | 3.462966627  | 0.000000000 |
| 6 | 18.377808000 | 1.519075000  | 0.000000000 | 1  | -19.365034414 | 0.961469017  | 0.000000000 |
| 6 | 12.206744000 | 2.950560000  | 0.000000000 | 35 | -17.253464380 | 5.463800816  | 0.000000000 |
| 6 | 13.360694000 | 3.723952000  | 0.000000000 | 35 | -13.415768715 | 5.523567283  | 0.000000000 |
| 6 | 12.201819000 | 1.530110000  | 0.000000000 | 35 | -9.579037893  | 5.553797350  | 0.000000000 |
| 6 | 13.347279000 | 0.731989000  | 0.000000000 | 35 | -5.757091973  | 5.573364602  | 0.000000000 |
| 6 | 14.511404000 | 1.522049000  | 0.000000000 | 6  | -6.873610961  | -1.566278487 | 0.000000000 |
| 6 | 14.516523000 | 2.933480000  | 0.000000000 | 6  | -6.870318915  | -2.980515432 | 0.000000000 |
| 6 | 16.025744000 | 2.928950000  | 0.000000000 | 6  | -5.707476923  | -3.745359407 | 0.000000000 |
| 6 | 16.020920000 | 1.505373000  | 0.000000000 | 35 | -5.698935818  | -5.632034484 | 0.000000000 |
| 6 | 17.171026000 | 0.739659000  | 0.000000000 | 6  | -8.372219278  | -2.990703179 | 0.000000000 |
| 6 | 18.382457000 | 2.902556000  | 0.000000000 | 6  | -8.384201957  | -1.573667265 | 0.000000000 |
| 6 | 17.179268000 | 3.665342000  | 0.000000000 | 6  | -9.540000186  | -0.782148403 | 0.000000000 |
| 1 | 13.368078000 | 4.809013000  | 0.000000000 | 6  | -10.691199901 | -1.587373165 | 0.000000000 |
| 6 | 13.347279000 | -0.731989000 | 0.000000000 | 6  | -12.200479973 | -1.592044108 | 0.000000000 |
| 6 | 14.511404000 | -1.522049000 | 0.000000000 | 6  | -12.190222907 | -3.011859008 | 0.000000000 |
| 6 | 16.020920000 | -1.505373000 | 0.000000000 | 6  | -10.688525041 | -3.000997301 | 0.000000000 |
| 6 | 17.171026000 | -0.739659000 | 0.000000000 | 6  | -9.524602657  | -3.766299680 | 0.000000000 |
| 6 | 18.377808000 | -1.519075000 | 0.000000000 | 35 | -9.518983136  | -5.652869906 | 0.000000000 |
| 6 | 17.179268000 | -3.665342000 | 0.000000000 | 6  | -13.350365458 | -0.801617598 | 0.000000000 |
| 6 | 16.025744000 | -2.928950000 | 0.000000000 | 6  | -14.510465832 | -1.597482391 | 0.000000000 |
| 6 | 14.516523000 | -2.933480000 | 0.000000000 | 6  | -14.507390871 | -3.007268401 | 0.000000000 |
| 6 | 13.360694000 | -3.723952000 | 0.000000000 | 6  | -13.343291194 | -3.779375952 | 0.000000000 |
| 6 | 12.206744000 | -2.950560000 | 0.000000000 | 35 | -13.350683511 | -5.666396662 | 0.000000000 |
| 6 | 12.201819000 | -1.530110000 | 0.000000000 | 6  | -16.026340598 | -1.597601472 | 0.000000000 |
| 1 | 17.203123000 | 4.750788000  | 0.000000000 | 6  | -16.002500091 | -3.023444012 | 0.000000000 |
| 1 | 13.368078000 | -4.809013000 | 0.000000000 | 6  | -17.179286733 | -0.830583149 | 0.000000000 |
| 6 | 18.382457000 | -2.902556000 | 0.000000000 | 6  | -18.356366953 | -1.661424467 | 0.000000000 |
| 1 | 17.203123000 | -4.750788000 | 0.000000000 | 6  | -18.364822607 | -3.038532834 | 0.000000000 |
| 1 | 19.335986000 | 1.010910000  | 0.000000000 | 6  | -17.147944817 | -3.764824070 | 0.000000000 |
| 1 | 19.336372000 | 3.423158000  | 0.000000000 | 35 | -17.173162050 | -5.657692295 | 0.000000000 |
| 1 | 19.335986000 | -1.010910000 | 0.000000000 | 1  | -19.319621764 | -3.550250148 | 0.000000000 |
| 1 | 19.336372000 | -3.423158000 | 0.000000000 | 9  | -19.576158380 | -1.076943247 | 0.000000000 |

Table 3. The Cartesian coordinates of the optimized molecular structures of 3\_m Bp-sheets (m=1-3) at the B3LYP/6-31G(d,p) level of theory

| 3_1 Bp_H |              |              | 3_1 Bp_F_Br |   |              |              |             |
|----------|--------------|--------------|-------------|---|--------------|--------------|-------------|
| 6        | -2.957375000 | 0.000000000  | 0.000000000 | 6 | 3.782701620  | 1.016269595  | 0.000000000 |
| 6        | -1.495698000 | 0.000000000  | 0.000000000 | 6 | -6.032941799 | -3.585017927 | 0.000000000 |
| 6        | -0.705612000 | 1.154511000  | 0.000000000 | 6 | -5.311743820 | -4.808178704 | 0.000000000 |
| 6        | 0.705612000  | 1.154511000  | 0.000000000 | 6 | -3.935970691 | -4.879360201 | 0.000000000 |
| 6        | -3.745164000 | 1.154901000  | 0.000000000 | 6 | -3.105736974 | -3.707869368 | 0.000000000 |
| 6        | -5.941085000 | 0.000000000  | 0.000000000 | 6 | -3.823305868 | -2.525014284 | 0.000000000 |
| 6        | -5.160876000 | 1.156990000  | 0.000000000 | 6 | -5.246913648 | -2.467698641 | 0.000000000 |
| 6        | 1.495698000  | 0.000000000  | 0.000000000 | 6 | -5.197882199 | -0.972717467 | 0.000000000 |
| 6        | -1.480454000 | 3.811360000  | 0.000000000 | 6 | -3.782701620 | -1.016269595 | 0.000000000 |
| 6        | -0.710063000 | 2.664160000  | 0.000000000 | 6 | -1.626534432 | -3.758995613 | 0.000000000 |
| 6        | 1.480454000  | 3.811360000  | 0.000000000 | 6 | -0.799032011 | -2.644897602 | 0.000000000 |
| 6        | 0.691809000  | 5.007522000  | 0.000000000 | 6 | -2.953985632 | 0.108952117  | 0.000000000 |
| 6        | -0.691809000 | 5.007522000  | 0.000000000 | 6 | -1.493849809 | 0.051994109  | 0.000000000 |
| 6        | -2.960402000 | 3.812775000  | 0.000000000 | 6 | -0.745951226 | -1.132178813 | 0.000000000 |
| 6        | -3.736327000 | 5.019094000  | 0.000000000 | 6 | 0.622449816  | -2.688042572 | 0.000000000 |
| 6        | -3.729414000 | 2.663094000  | 0.000000000 | 6 | 0.663976673  | -1.179471851 | 0.000000000 |
| 6        | -5.121491000 | 5.025271000  | 0.000000000 | 6 | 1.354466235  | -3.865672490 | 0.000000000 |
| 6        | -5.152183000 | 2.668131000  | 0.000000000 | 6 | 2.833220377  | -3.920210557 | 0.000000000 |
| 6        | -5.885851000 | 3.825264000  | 0.000000000 | 6 | 3.648651344  | -2.801633943 | 0.000000000 |
| 6        | 0.710063000  | 2.664160000  | 0.000000000 | 6 | 3.705446574  | -1.289535634 | 0.000000000 |
| 1        | -7.026291000 | 0.000000000  | 0.000000000 | 6 | 2.953985632  | -0.108952117 | 0.000000000 |
| 1        | 1.189360000  | 5.971464000  | 0.000000000 | 6 | 1.493849809  | -0.051994109 | 0.000000000 |
| 1        | -1.189360000 | 5.971464000  | 0.000000000 | 6 | -0.847671767 | -4.960015657 | 0.000000000 |
| 1        | -3.226692000 | 5.976627000  | 0.000000000 | 6 | 0.527199951  | -5.029509894 | 0.000000000 |
| 1        | -5.640075000 | 5.980206000  | 0.000000000 | 6 | 3.612457604  | -5.130648038 | 0.000000000 |
| 1        | -6.971204000 | 3.851758000  | 0.000000000 | 6 | 4.989395094  | -5.195907888 | 0.000000000 |
| 6        | -1.480454000 | -3.811360000 | 0.000000000 | 6 | 5.766021445  | -4.012251093 | 0.000000000 |
| 6        | -0.691809000 | -5.007522000 | 0.000000000 | 6 | 5.072890530  | -2.835351171 | 0.000000000 |
| 6        | 1.480454000  | -3.811360000 | 0.000000000 | 6 | 5.119206139  | -1.341269345 | 0.000000000 |
| 6        | 0.710063000  | -2.664160000 | 0.000000000 | 6 | 5.928110381  | -0.209542579 | 0.000000000 |
| 6        | -0.710063000 | -2.664160000 | 0.000000000 | 6 | 5.197882199  | 0.972717467  | 0.000000000 |
| 6        | -2.960402000 | -3.812775000 | 0.000000000 | 6 | 0.745951226  | 1.132178813  | 0.000000000 |

|   |              |              |             |    |              |              |             |
|---|--------------|--------------|-------------|----|--------------|--------------|-------------|
| 6 | -0.705612000 | -1.154511000 | 0.000000000 | 6  | -0.663976673 | 1.179471851  | 0.000000000 |
| 6 | -3.729414000 | -2.663094000 | 0.000000000 | 6  | -3.705446574 | 1.289535634  | 0.000000000 |
| 6 | -3.745164000 | -1.154901000 | 0.000000000 | 6  | -5.119206139 | 1.341269345  | 0.000000000 |
| 6 | 0.705612000  | -1.154511000 | 0.000000000 | 6  | -5.928110381 | 0.209542579  | 0.000000000 |
| 6 | -3.736327000 | -5.019094000 | 0.000000000 | 6  | -5.072890530 | 2.835351171  | 0.000000000 |
| 6 | -5.160876000 | -1.156990000 | 0.000000000 | 6  | -3.648651344 | 2.801633943  | 0.000000000 |
| 6 | -5.152183000 | -2.668131000 | 0.000000000 | 6  | -2.833220377 | 3.920210557  | 0.000000000 |
| 6 | -5.121491000 | -5.025271000 | 0.000000000 | 6  | -1.354466235 | 3.865672490  | 0.000000000 |
| 6 | -5.885851000 | -3.825264000 | 0.000000000 | 6  | -0.622449816 | 2.688042572  | 0.000000000 |
| 6 | 0.691809000  | -5.007522000 | 0.000000000 | 6  | 0.799032011  | 2.644897602  | 0.000000000 |
| 1 | -6.971204000 | -3.851758000 | 0.000000000 | 6  | 1.626534432  | 3.758995613  | 0.000000000 |
| 6 | 5.941085000  | 0.000000000  | 0.000000000 | 6  | 3.105736974  | 3.707869368  | 0.000000000 |
| 6 | 5.160876000  | 1.156990000  | 0.000000000 | 6  | 3.823305868  | 2.525014284  | 0.000000000 |
| 6 | 2.957375000  | 0.000000000  | 0.000000000 | 6  | 5.246913648  | 2.467698641  | 0.000000000 |
| 6 | 3.745164000  | 1.154901000  | 0.000000000 | 6  | 6.032941799  | 3.585017927  | 0.000000000 |
| 6 | 5.885851000  | 3.825264000  | 0.000000000 | 6  | 5.311743820  | 4.808178704  | 0.000000000 |
| 6 | 5.121491000  | 5.025271000  | 0.000000000 | 6  | 3.935970691  | 4.879360201  | 0.000000000 |
| 6 | 5.152183000  | 2.668131000  | 0.000000000 | 6  | 0.847671767  | 4.960015657  | 0.000000000 |
| 6 | 3.736327000  | 5.019094000  | 0.000000000 | 6  | -0.527199951 | 5.029509894  | 0.000000000 |
| 6 | 3.729414000  | 2.663094000  | 0.000000000 | 6  | -3.612457604 | 5.130648038  | 0.000000000 |
| 6 | 2.960402000  | 3.812775000  | 0.000000000 | 6  | -4.989395094 | 5.195907888  | 0.000000000 |
| 1 | 5.640075000  | 5.980206000  | 0.000000000 | 6  | -5.766021445 | 4.012251093  | 0.000000000 |
| 1 | 3.226692000  | 5.976627000  | 0.000000000 | 35 | -7.813637131 | 0.276584975  | 0.000000000 |
| 6 | 5.885851000  | -3.825264000 | 0.000000000 | 35 | -7.655841593 | 4.114532466  | 0.000000000 |
| 6 | 5.152183000  | -2.668131000 | 0.000000000 | 1  | -5.459810674 | 6.171618809  | 0.000000000 |
| 6 | 5.160876000  | -1.156990000 | 0.000000000 | 9  | -2.979252625 | 6.326186026  | 0.000000000 |
| 6 | 3.745164000  | -1.154901000 | 0.000000000 | 1  | -0.953388448 | 6.019431466  | 0.000000000 |
| 6 | 3.729414000  | -2.663094000 | 0.000000000 | 9  | 1.479829684  | 6.158971596  | 0.000000000 |
| 6 | 3.736327000  | -5.019094000 | 0.000000000 | 1  | 3.503271519  | 5.866705331  | 0.000000000 |
| 6 | 2.960402000  | -3.812775000 | 0.000000000 | 9  | 6.011020044  | 5.953862678  | 0.000000000 |
| 6 | 5.121491000  | -5.025271000 | 0.000000000 | 35 | 7.917941135  | 3.571512787  | 0.000000000 |
| 1 | -1.189360000 | -5.971464000 | 0.000000000 | 35 | 7.813637131  | -0.276584975 | 0.000000000 |
| 1 | -3.226692000 | -5.976627000 | 0.000000000 | 35 | 7.655841593  | -4.114532466 | 0.000000000 |
| 1 | -5.640075000 | -5.980206000 | 0.000000000 | 1  | 5.459810674  | -6.171618809 | 0.000000000 |
| 1 | 1.189360000  | -5.971464000 | 0.000000000 | 9  | 2.979252625  | -6.326186026 | 0.000000000 |
| 1 | 7.026291000  | 0.000000000  | 0.000000000 | 1  | 0.953388448  | -6.019431466 | 0.000000000 |
| 1 | 6.971204000  | 3.851758000  | 0.000000000 | 9  | -1.479829684 | -6.158971596 | 0.000000000 |
| 1 | 6.971204000  | -3.851758000 | 0.000000000 | 1  | -3.503271519 | -5.866705331 | 0.000000000 |
| 1 | 3.226692000  | -5.976627000 | 0.000000000 | 9  | -6.011020044 | -5.953862678 | 0.000000000 |
| 1 | 5.640075000  | -5.980206000 | 0.000000000 | 35 | -7.917941135 | -3.571512787 | 0.000000000 |

| <b>3_2 Bp_H</b> |              |              |             | <b>3_2 Bp_F_Br</b> |              |              |             |
|-----------------|--------------|--------------|-------------|--------------------|--------------|--------------|-------------|
| 6               | -1.915693000 | 5.957199000  | 0.000000000 | 6                  | -6.265574118 | -5.307095606 | 0.000000000 |
| 6               | -3.070185000 | 5.166444000  | 0.000000000 | 6                  | -5.579305919 | -6.551351212 | 0.000000000 |
| 6               | -1.899671000 | 2.967438000  | 0.000000000 | 6                  | -4.206985149 | -6.662480267 | 0.000000000 |
| 6               | -3.062266000 | 3.753891000  | 0.000000000 | 6                  | -3.342894314 | -5.514113619 | 0.000000000 |
| 6               | -5.738192000 | 5.885307000  | 0.000000000 | 6                  | -4.026577515 | -4.311647178 | 0.000000000 |
| 6               | -6.937549000 | 5.116965000  | 0.000000000 | 6                  | -5.448527383 | -4.213125411 | 0.000000000 |
| 6               | -4.580525000 | 5.154814000  | 0.000000000 | 6                  | -5.355417161 | -2.719639468 | 0.000000000 |
| 6               | -6.927344000 | 3.733227000  | 0.000000000 | 6                  | -3.945139886 | -2.804384243 | 0.000000000 |
| 6               | -4.570483000 | 3.731190000  | 0.000000000 | 6                  | -6.054753620 | -1.514204428 | 0.000000000 |
| 6               | -5.717235000 | 2.959479000  | 0.000000000 | 6                  | -5.217508432 | -0.406833639 | 0.000000000 |
| 1               | -7.893497000 | 5.633582000  | 0.000000000 | 6                  | -3.802638619 | -0.502210743 | 0.000000000 |
| 1               | -7.882977000 | 3.220239000  | 0.000000000 | 6                  | -3.081501182 | -1.700374347 | 0.000000000 |
| 6               | -1.899671000 | -2.967438000 | 0.000000000 | 6                  | -5.119882725 | 1.091260982  | 0.000000000 |
| 6               | -1.900389000 | -1.503027000 | 0.000000000 | 6                  | -3.703380544 | 1.002552490  | 0.000000000 |
| 6               | -3.057561000 | -0.704844000 | 0.000000000 | 6                  | -5.805939571 | 2.296179686  | 0.000000000 |
| 6               | -3.057561000 | 0.704844000  | 0.000000000 | 6                  | -4.954847233 | 3.401655316  | 0.000000000 |
| 6               | -3.062266000 | -3.753891000 | 0.000000000 | 6                  | -3.546776769 | 3.304268811  | 0.000000000 |
| 6               | -1.915693000 | -5.957199000 | 0.000000000 | 6                  | -2.832682559 | 2.095379311  | 0.000000000 |
| 6               | -3.070185000 | -5.166444000 | 0.000000000 | 6                  | -4.862207608 | 4.894074624  | 0.000000000 |
| 6               | -1.900389000 | 1.503027000  | 0.000000000 | 6                  | -3.439104847 | 4.813848724  | 0.000000000 |
| 6               | -5.713409000 | -1.480344000 | 0.000000000 | 6                  | -5.517513292 | 6.091478503  | 0.000000000 |
| 6               | -4.567082000 | -0.710520000 | 0.000000000 | 6                  | -4.703294580 | 7.250821237  | 0.000000000 |
| 6               | -5.713409000 | 1.480344000  | 0.000000000 | 6                  | -3.330018462 | 7.141183608  | 0.000000000 |
| 6               | -6.911438000 | 0.690863000  | 0.000000000 | 6                  | -2.588593979 | 5.905687219  | 0.000000000 |
| 6               | -6.911438000 | -0.690863000 | 0.000000000 | 1                  | -5.143025989 | 8.240774674  | 0.000000000 |
| 6               | -5.717235000 | -2.959479000 | 0.000000000 | 9                  | -2.658678500 | 8.315403765  | 0.000000000 |
| 6               | -6.927344000 | -3.733227000 | 0.000000000 | 35                 | -7.403124568 | 6.254346094  | 0.000000000 |
| 6               | -4.570483000 | -3.731190000 | 0.000000000 | 35                 | -7.687879410 | 2.431990648  | 0.000000000 |
| 6               | -6.937549000 | -5.116965000 | 0.000000000 | 35                 | -7.938020677 | -1.403615859 | 0.000000000 |
| 6               | -4.580525000 | -5.154814000 | 0.000000000 | 35                 | -8.149762997 | -5.242878634 | 0.000000000 |
| 6               | -5.738192000 | -5.885307000 | 0.000000000 | 9                  | -6.312530570 | -7.675741690 | 0.000000000 |
| 6               | -4.567082000 | 0.710520000  | 0.000000000 | 1                  | -3.802776658 | -7.661900215 | 0.000000000 |

|                 |               |              |             |                    |               |              |             |
|-----------------|---------------|--------------|-------------|--------------------|---------------|--------------|-------------|
| 1               | -1.924716000  | -7.042266000 | 0.000000000 | 6                  | -1.622351756  | -1.802275758 | 0.000000000 |
| 1               | -7.874786000  | 1.189364000  | 0.000000000 | 6                  | -0.754946917  | -0.706439813 | 0.000000000 |
| 1               | -7.874786000  | -1.189364000 | 0.000000000 | 6                  | -0.656755906  | 0.798359902  | 0.000000000 |
| 1               | -7.882977000  | -3.220239000 | 0.000000000 | 6                  | 0.754946917   | 0.706439813  | 0.000000000 |
| 1               | -7.893497000  | -5.633582000 | 0.000000000 | 6                  | 0.656755906   | -0.798359902 | 0.000000000 |
| 1               | -5.767862000  | -6.970494000 | 0.000000000 | 6                  | 1.372987099   | -1.998562174 | 0.000000000 |
| 6               | 1.915693000   | 5.957199000  | 0.000000000 | 6                  | 0.502226111   | -3.101503843 | 0.000000000 |
| 6               | 0.757111000   | 5.186106000  | 0.000000000 | 6                  | -0.904564076  | -3.011009787 | 0.000000000 |
| 6               | -0.757111000  | 5.186106000  | 0.000000000 | 6                  | -1.004591979  | -4.521277331 | 0.000000000 |
| 6               | -0.752590000  | 3.766779000  | 0.000000000 | 6                  | 0.415607231   | -4.608086849 | 0.000000000 |
| 6               | 0.752590000   | 3.766779000  | 0.000000000 | 6                  | 1.112132958   | -5.806172074 | 0.000000000 |
| 6               | 3.062266000   | 3.753891000  | 0.000000000 | 6                  | 0.249029725   | -6.945438734 | 0.000000000 |
| 6               | 1.899671000   | 2.967438000  | 0.000000000 | 6                  | -1.122174644  | -6.833861956 | 0.000000000 |
| 6               | 1.900389000   | -1.503027000 | 0.000000000 | 6                  | -1.865613099  | -5.608911534 | 0.000000000 |
| 6               | 3.057561000   | -0.704844000 | 0.000000000 | 9                  | -1.790400191  | -8.012783589 | 0.000000000 |
| 6               | 1.900389000   | 1.503027000  | 0.000000000 | 1                  | 0.644639842   | -7.948066039 | 0.000000000 |
| 6               | 0.752792000   | 0.708011000  | 0.000000000 | 6                  | -1.372987099  | 1.998562174  | 0.000000000 |
| 6               | 0.752792000   | -0.708011000 | 0.000000000 | 6                  | -0.502226111  | 3.101503843  | 0.000000000 |
| 6               | 1.899671000   | -2.967438000 | 0.000000000 | 6                  | 0.904564076   | 3.011009787  | 0.000000000 |
| 6               | -0.752792000  | -0.708011000 | 0.000000000 | 6                  | 1.622351756   | 1.802275758  | 0.000000000 |
| 6               | 0.752590000   | -3.766779000 | 0.000000000 | 6                  | -0.415607231  | 4.608086849  | 0.000000000 |
| 6               | -0.752590000  | -3.766779000 | 0.000000000 | 6                  | -1.112132958  | 5.806172074  | 0.000000000 |
| 6               | -0.752792000  | 0.708011000  | 0.000000000 | 6                  | 1.004591979   | 4.521277331  | 0.000000000 |
| 6               | 3.062266000   | -3.753891000 | 0.000000000 | 6                  | 1.865613099   | 5.608911534  | 0.000000000 |
| 6               | -0.757111000  | -5.186106000 | 0.000000000 | 6                  | 1.122174644   | 6.833861956  | 0.000000000 |
| 6               | 0.757111000   | -5.186106000 | 0.000000000 | 6                  | -0.249029725  | 6.945438734  | 0.000000000 |
| 6               | 3.070185000   | -5.166444000 | 0.000000000 | 1                  | -0.644639842  | 7.948066039  | 0.000000000 |
| 6               | 1.915693000   | -5.957199000 | 0.000000000 | 9                  | 1.790400191   | 8.012783589  | 0.000000000 |
| 6               | 3.057561000   | 0.704844000  | 0.000000000 | 6                  | 3.342894314   | 5.514113619  | 0.000000000 |
| 1               | 1.924716000   | -7.042266000 | 0.000000000 | 6                  | 3.081501182   | 1.700374347  | 0.000000000 |
| 6               | 3.070185000   | 5.166444000  | 0.000000000 | 6                  | 3.945139886   | 2.804384243  | 0.000000000 |
| 6               | 5.738192000   | 5.885307000  | 0.000000000 | 6                  | 4.026577515   | 4.311647178  | 0.000000000 |
| 6               | 4.580525000   | 5.154814000  | 0.000000000 | 6                  | 4.206985149   | 6.662480267  | 0.000000000 |
| 6               | 6.937549000   | 5.116965000  | 0.000000000 | 6                  | 5.579305919   | 6.551351212  | 0.000000000 |
| 6               | 4.570483000   | 3.731190000  | 0.000000000 | 6                  | 6.265574118   | 5.307095606  | 0.000000000 |
| 6               | 6.927344000   | 3.733227000  | 0.000000000 | 6                  | 5.448527383   | 4.213125411  | 0.000000000 |
| 6               | 5.717235000   | 2.959479000  | 0.000000000 | 6                  | 5.355417161   | 2.719639468  | 0.000000000 |
| 1               | 7.882977000   | 3.220239000  | 0.000000000 | 6                  | 2.588593979   | -5.905687219 | 0.000000000 |
| 1               | 7.893497000   | 5.633582000  | 0.000000000 | 6                  | 3.439104847   | -4.813848724 | 0.000000000 |
| 6               | 5.713409000   | -1.480344000 | 0.000000000 | 6                  | 3.546776769   | -3.304268811 | 0.000000000 |
| 6               | 6.911438000   | -0.690863000 | 0.000000000 | 6                  | 2.832682559   | -2.095379311 | 0.000000000 |
| 6               | 5.713409000   | 1.480344000  | 0.000000000 | 6                  | 3.703380544   | -1.002552490 | 0.000000000 |
| 6               | 4.567082000   | 0.710520000  | 0.000000000 | 6                  | 3.802638619   | 0.502210743  | 0.000000000 |
| 6               | 4.567082000   | -0.710520000 | 0.000000000 | 6                  | 5.217508432   | 0.406833639  | 0.000000000 |
| 6               | 5.717235000   | -2.959479000 | 0.000000000 | 6                  | 6.054753620   | 1.514204428  | 0.000000000 |
| 6               | 4.570483000   | -3.731190000 | 0.000000000 | 6                  | 5.119882725   | -1.091260982 | 0.000000000 |
| 6               | 6.927344000   | -3.733227000 | 0.000000000 | 6                  | 5.805939571   | -2.296179686 | 0.000000000 |
| 6               | 4.580525000   | -5.154814000 | 0.000000000 | 6                  | 4.954847233   | -3.401655316 | 0.000000000 |
| 6               | 6.937549000   | -5.116965000 | 0.000000000 | 6                  | 4.862207608   | -4.894074624 | 0.000000000 |
| 6               | 5.738192000   | -5.885307000 | 0.000000000 | 6                  | 5.517513292   | -6.091478503 | 0.000000000 |
| 1               | 7.893497000   | -5.633582000 | 0.000000000 | 6                  | 4.703294580   | -7.250821237 | 0.000000000 |
| 1               | 7.874786000   | -1.189364000 | 0.000000000 | 6                  | 3.330018462   | -7.141183608 | 0.000000000 |
| 1               | 7.882977000   | -3.220239000 | 0.000000000 | 9                  | 2.658678500   | -8.315403765 | 0.000000000 |
| 6               | 6.911438000   | 0.690863000  | 0.000000000 | 1                  | 5.143025989   | -8.240774674 | 0.000000000 |
| 1               | 7.874786000   | 1.189364000  | 0.000000000 | 35                 | 7.403124568   | -6.254346094 | 0.000000000 |
| 1               | 5.767862000   | -6.970494000 | 0.000000000 | 35                 | 7.687879410   | -2.431990648 | 0.000000000 |
| 1               | -1.924716000  | 7.042266000  | 0.000000000 | 35                 | 7.938020677   | 1.403615859  | 0.000000000 |
| 1               | -5.767862000  | 6.970494000  | 0.000000000 | 35                 | 8.149762997   | 5.242878634  | 0.000000000 |
| 1               | 1.924716000   | 7.042266000  | 0.000000000 | 9                  | 6.312530570   | 7.675741690  | 0.000000000 |
| 1               | 5.767862000   | 6.970494000  | 0.000000000 | 1                  | 3.802776658   | 7.661900215  | 0.000000000 |
| <b>3_3 Bp_H</b> |               |              |             | <b>3_3 Bp_F_Br</b> |               |              |             |
| 6               | -9.525605000  | 1.479762000  | 0.000000000 | 6                  | -10.496307685 | -5.650378418 | 0.000000000 |
| 6               | -8.378337000  | 0.710557000  | 0.000000000 | 6                  | -10.539060258 | -4.273944798 | 0.000000000 |
| 6               | -9.525605000  | -1.479762000 | 0.000000000 | 6                  | -9.392634549  | -3.399901994 | 0.000000000 |
| 6               | -10.723596000 | -0.690569000 | 0.000000000 | 6                  | -8.213743125  | -4.124307186 | 0.000000000 |
| 6               | -10.723596000 | 0.690569000  | 0.000000000 | 6                  | -8.136446301  | -5.547888315 | 0.000000000 |
| 6               | -9.531704000  | 2.957376000  | 0.000000000 | 6                  | -9.253467915  | -6.331538540 | 0.000000000 |
| 6               | -10.742369000 | 3.730663000  | 0.000000000 | 35                 | -9.207766399  | -8.223928731 | 0.000000000 |
| 6               | -8.385367000  | 3.729332000  | 0.000000000 | 1                  | -11.431568360 | -6.196941935 | 0.000000000 |
| 6               | -10.753410000 | 5.114310000  | 0.000000000 | 9                  | -11.780287354 | -3.736519001 | 0.000000000 |
| 6               | -8.396674000  | 5.152696000  | 0.000000000 | 6                  | -9.456603670  | -1.922388020 | 0.000000000 |
| 6               | -9.554356000  | 5.883093000  | 0.000000000 | 6                  | -8.343274083  | -1.097350646 | 0.000000000 |
| 6               | -8.378337000  | -0.710557000 | 0.000000000 | 6                  | -8.414713595  | 0.324169012  | 0.000000000 |

|   |               |              |             |    |               |              |             |
|---|---------------|--------------|-------------|----|---------------|--------------|-------------|
| 1 | -9.583567000  | 6.968336000  | 0.000000000 | 6  | -9.591429747  | 1.058705810  | 0.000000000 |
| 6 | -5.709392000  | 1.503025000  | 0.000000000 | 6  | -10.726563986 | 0.183212883  | 0.000000000 |
| 6 | -4.562391000  | 0.708472000  | 0.000000000 | 6  | -10.685272257 | -1.190984104 | 0.000000000 |
| 6 | -5.709392000  | -1.503025000 | 0.000000000 | 1  | -11.637807211 | -1.695266861 | 0.000000000 |
| 6 | -6.867990000  | -0.704206000 | 0.000000000 | 9  | -11.972449108 | 0.716328780  | 0.000000000 |
| 6 | -6.867990000  | 0.704206000  | 0.000000000 | 6  | -9.663007660  | 2.536501459  | 0.000000000 |
| 6 | -5.712139000  | 2.965805000  | 0.000000000 | 6  | -8.544731625  | 3.349866983  | 0.000000000 |
| 6 | -6.877093000  | 3.752302000  | 0.000000000 | 6  | -8.605631888  | 4.774356822  | 0.000000000 |
| 6 | -4.568046000  | 3.766763000  | 0.000000000 | 6  | -9.783376745  | 5.464201657  | 0.000000000 |
| 6 | -6.886849000  | 5.164138000  | 0.000000000 | 6  | -10.943844983 | 4.643093977  | 0.000000000 |
| 6 | -4.576484000  | 5.186738000  | 0.000000000 | 6  | -10.901408393 | 3.267675497  | 0.000000000 |
| 6 | -5.733202000  | 5.957137000  | 0.000000000 | 1  | -11.849760023 | 2.755206972  | 0.000000000 |
| 6 | -4.562391000  | -0.708472000 | 0.000000000 | 9  | -12.142817377 | 5.246938779  | 0.000000000 |
| 1 | -5.743133000  | 7.042112000  | 0.000000000 | 35 | -9.930950544  | 7.344101202  | 0.000000000 |
| 6 | -9.554356000  | -5.883093000 | 0.000000000 | 6  | -7.111208285  | 4.846695508  | 0.000000000 |
| 6 | -10.753410000 | -5.114310000 | 0.000000000 | 6  | -7.037924035  | 3.437110149  | 0.000000000 |
| 6 | -10.742369000 | -3.730663000 | 0.000000000 | 6  | -5.991217076  | 5.678109609  | 0.000000000 |
| 6 | -8.385367000  | -3.729332000 | 0.000000000 | 6  | -4.798434374  | 4.970973948  | 0.000000000 |
| 6 | -9.531704000  | -2.957376000 | 0.000000000 | 6  | -4.734057758  | 3.553270844  | 0.000000000 |
| 6 | -8.396674000  | -5.152696000 | 0.000000000 | 6  | -5.842146331  | 2.701720822  | 0.000000000 |
| 6 | -5.733202000  | -5.957137000 | 0.000000000 | 6  | -3.227289968  | 3.626960691  | 0.000000000 |
| 6 | -6.886849000  | -5.164138000 | 0.000000000 | 6  | -3.298419077  | 5.040245320  | 0.000000000 |
| 6 | -4.576484000  | -5.186738000 | 0.000000000 | 6  | -2.038182769  | 2.882759800  | 0.000000000 |
| 6 | -6.877093000  | -3.752302000 | 0.000000000 | 6  | -0.923723062  | 3.733436660  | 0.000000000 |
| 6 | -4.568046000  | -3.766763000 | 0.000000000 | 6  | -0.984482067  | 5.147647708  | 0.000000000 |
| 6 | -5.712139000  | -2.965805000 | 0.000000000 | 6  | -2.176730018  | 5.863686400  | 0.000000000 |
| 6 | 1.905668000   | 2.975842000  | 0.000000000 | 35 | -2.265579400  | 7.748420267  | 0.000000000 |
| 6 | 1.903791000   | 1.509680000  | 0.000000000 | 35 | -6.095596674  | 7.562121420  | 0.000000000 |
| 6 | 0.753968000   | 0.707732000  | 0.000000000 | 6  | 0.584124525   | 3.801815375  | 0.000000000 |
| 6 | 0.753968000   | -0.707732000 | 0.000000000 | 6  | 0.516114207   | 5.216772139  | 0.000000000 |
| 6 | 0.753612000   | 3.775189000  | 0.000000000 | 6  | 1.769926478   | 3.055504399  | 0.000000000 |
| 6 | 1.909990000   | 5.973116000  | 0.000000000 | 6  | 2.888206941   | 3.904351199  | 0.000000000 |
| 6 | 0.755678000   | 5.192247000  | 0.000000000 | 6  | 2.830299866   | 5.317077997  | 0.000000000 |
| 6 | 1.903791000   | -1.509680000 | 0.000000000 | 6  | 1.638001323   | 6.036578851  | 0.000000000 |
| 6 | -1.903791000  | 1.509680000  | 0.000000000 | 35 | 1.557399393   | 7.921563803  | 0.000000000 |
| 6 | -0.753968000  | 0.707732000  | 0.000000000 | 6  | 4.329849672   | 5.385205252  | 0.000000000 |
| 6 | -1.903791000  | -1.509680000 | 0.000000000 | 6  | 4.396068055   | 3.966593830  | 0.000000000 |
| 6 | -3.055356000  | -0.706714000 | 0.000000000 | 6  | 5.576981606   | 3.220814075  | 0.000000000 |
| 6 | -3.055356000  | 0.706714000  | 0.000000000 | 6  | 6.701581727   | 4.064778569  | 0.000000000 |
| 6 | -1.905668000  | 2.975842000  | 0.000000000 | 6  | 6.643402741   | 5.473858496  | 0.000000000 |
| 6 | -3.061843000  | 3.773427000  | 0.000000000 | 6  | 5.450659731   | 6.199173194  | 0.000000000 |
| 6 | -0.753612000  | 3.775189000  | 0.000000000 | 35 | 5.382863886   | 8.085015485  | 0.000000000 |
| 6 | -3.064556000  | 5.188925000  | 0.000000000 | 6  | 8.136446301   | 5.547888315  | 0.000000000 |
| 6 | -0.755678000  | 5.192247000  | 0.000000000 | 6  | 8.213743125   | 4.124307186  | 0.000000000 |
| 6 | -1.909990000  | 5.973116000  | 0.000000000 | 6  | 9.392634549   | 3.399901994  | 0.000000000 |
| 6 | -0.753968000  | -0.707732000 | 0.000000000 | 6  | 10.539060258  | 4.273944798  | 0.000000000 |
| 1 | 1.911154000   | 7.058058000  | 0.000000000 | 6  | 10.496307685  | 5.650378418  | 0.000000000 |
| 1 | -1.911154000  | 7.058058000  | 0.000000000 | 6  | 9.253467915   | 6.331538540  | 0.000000000 |
| 6 | 5.709392000   | 1.503025000  | 0.000000000 | 35 | 9.207766399   | 8.223928731  | 0.000000000 |
| 6 | 6.867990000   | 0.704206000  | 0.000000000 | 1  | 11.431568360  | 6.196941935  | 0.000000000 |
| 6 | 5.709392000   | -1.503025000 | 0.000000000 | 9  | 11.780287354  | 3.736519001  | 0.000000000 |
| 6 | 4.562391000   | -0.708472000 | 0.000000000 | 6  | 9.456603670   | 1.922388020  | 0.000000000 |
| 6 | 4.562391000   | 0.708472000  | 0.000000000 | 6  | 10.685272257  | 1.190984104  | 0.000000000 |
| 6 | 5.712139000   | 2.965805000  | 0.000000000 | 6  | 8.343274083   | 1.097350646  | 0.000000000 |
| 6 | 3.055356000   | 0.706714000  | 0.000000000 | 6  | 8.414713595   | -0.324169012 | 0.000000000 |
| 6 | 4.568046000   | 3.766763000  | 0.000000000 | 6  | 9.591429747   | -1.058705810 | 0.000000000 |
| 6 | 3.061843000   | 3.773427000  | 0.000000000 | 6  | 10.726563986  | -0.183212883 | 0.000000000 |
| 6 | 3.055356000   | -0.706714000 | 0.000000000 | 1  | 11.637807211  | 1.695266861  | 0.000000000 |
| 6 | 6.877093000   | 3.752302000  | 0.000000000 | 9  | 11.972449108  | -0.716328780 | 0.000000000 |
| 6 | 3.064556000   | 5.188925000  | 0.000000000 | 6  | 9.663007660   | -2.536501459 | 0.000000000 |
| 6 | 4.576484000   | 5.186738000  | 0.000000000 | 6  | 10.901408393  | -3.267675497 | 0.000000000 |
| 6 | 6.886849000   | 5.164138000  | 0.000000000 | 6  | 8.544731625   | -3.349866983 | 0.000000000 |
| 6 | 5.733202000   | 5.957137000  | 0.000000000 | 6  | 8.605631888   | -4.774356822 | 0.000000000 |
| 6 | 6.867990000   | -0.704206000 | 0.000000000 | 6  | 9.783376745   | -5.464201657 | 0.000000000 |
| 1 | 5.743133000   | 7.042112000  | 0.000000000 | 6  | 10.943844983  | -4.643093977 | 0.000000000 |
| 6 | 9.525605000   | 1.479762000  | 0.000000000 | 9  | 12.142817377  | -5.246938779 | 0.000000000 |
| 6 | 10.723596000  | 0.690569000  | 0.000000000 | 1  | 11.849760023  | -2.755206972 | 0.000000000 |
| 6 | 9.525605000   | -1.479762000 | 0.000000000 | 35 | 9.930950544   | -7.344101202 | 0.000000000 |
| 6 | 8.378337000   | -0.710557000 | 0.000000000 | 6  | 7.111208285   | -4.846695508 | 0.000000000 |
| 6 | 8.378337000   | 0.710557000  | 0.000000000 | 6  | 7.037924035   | -3.437110149 | 0.000000000 |
| 6 | 9.531704000   | 2.957376000  | 0.000000000 | 6  | 5.842146331   | -2.701720822 | 0.000000000 |
| 6 | 8.385367000   | 3.729332000  | 0.000000000 | 6  | 5.779508856   | -1.240524356 | 0.000000000 |
| 6 | 10.742369000  | 3.730663000  | 0.000000000 | 6  | 4.595032639   | -0.499795433 | 0.000000000 |
| 6 | 8.396674000   | 5.152696000  | 0.000000000 | 6  | 4.530078817   | 0.914446952  | 0.000000000 |

|   |               |              |             |    |              |              |             |
|---|---------------|--------------|-------------|----|--------------|--------------|-------------|
| 6 | 10.753410000  | 5.114310000  | 0.000000000 | 6  | 5.642181729  | 1.759679679  | 0.000000000 |
| 6 | 9.554356000   | 5.883093000  | 0.000000000 | 6  | 6.836482286  | 1.015657881  | 0.000000000 |
| 1 | 11.709912000  | 5.630040000  | 0.000000000 | 6  | 6.902440125  | -0.391489668 | 0.000000000 |
| 1 | 11.686850000  | 1.189172000  | 0.000000000 | 6  | 4.734057758  | -3.553270844 | 0.000000000 |
| 1 | 11.697836000  | 3.217453000  | 0.000000000 | 6  | 3.227289968  | -3.626960691 | 0.000000000 |
| 6 | 10.723596000  | -0.690569000 | 0.000000000 | 6  | 2.038182769  | -2.882759800 | 0.000000000 |
| 1 | 11.686850000  | -1.189172000 | 0.000000000 | 6  | 1.972021736  | -1.419405850 | 0.000000000 |
| 1 | 9.583567000   | 6.968336000  | 0.000000000 | 6  | 3.088038111  | -0.567161543 | 0.000000000 |
| 6 | 1.909990000   | -5.973116000 | 0.000000000 | 6  | 3.023566211  | 0.844536721  | 0.000000000 |
| 6 | 0.755678000   | -5.192247000 | 0.000000000 | 6  | 0.785705566  | -0.672011487 | 0.000000000 |
| 6 | 1.905668000   | -2.975842000 | 0.000000000 | 6  | 0.721287382  | 0.740872573  | 0.000000000 |
| 6 | 0.753612000   | -3.775189000 | 0.000000000 | 6  | 1.835225774  | 1.592241470  | 0.000000000 |
| 6 | -1.909990000  | -5.973116000 | 0.000000000 | 6  | 3.298419077  | -5.040245320 | 0.000000000 |
| 6 | -3.064556000  | -5.188925000 | 0.000000000 | 6  | 4.798434374  | -4.970973948 | 0.000000000 |
| 6 | -0.755678000  | -5.192247000 | 0.000000000 | 6  | 5.991217076  | -5.678109609 | 0.000000000 |
| 6 | -3.061843000  | -3.773427000 | 0.000000000 | 35 | 6.095596674  | -7.562121420 | 0.000000000 |
| 6 | -0.753612000  | -3.775189000 | 0.000000000 | 6  | 2.176730018  | -5.863686400 | 0.000000000 |
| 6 | -1.905668000  | -2.975842000 | 0.000000000 | 6  | 0.984482067  | -5.147647708 | 0.000000000 |
| 6 | 5.733202000   | -5.957137000 | 0.000000000 | 6  | 0.923723062  | -3.733436660 | 0.000000000 |
| 6 | 4.576484000   | -5.186738000 | 0.000000000 | 35 | 2.265579400  | -7.748420267 | 0.000000000 |
| 6 | 3.064556000   | -5.188925000 | 0.000000000 | 6  | -0.516114207 | -5.216772139 | 0.000000000 |
| 6 | 3.061843000   | -3.773427000 | 0.000000000 | 6  | -0.584124525 | -3.801815375 | 0.000000000 |
| 6 | 4.568046000   | -3.766763000 | 0.000000000 | 6  | -1.638001323 | -6.036578851 | 0.000000000 |
| 6 | 6.877093000   | -3.752302000 | 0.000000000 | 6  | -2.830299866 | -5.317077997 | 0.000000000 |
| 6 | 5.712139000   | -2.965805000 | 0.000000000 | 6  | -2.888206941 | -3.904351199 | 0.000000000 |
| 6 | 6.886849000   | -5.164138000 | 0.000000000 | 6  | -1.769926478 | -3.055504399 | 0.000000000 |
| 6 | 9.554356000   | -5.883093000 | 0.000000000 | 35 | -1.557399393 | -7.921563803 | 0.000000000 |
| 6 | 8.396674000   | -5.152696000 | 0.000000000 | 6  | -4.329849672 | -5.385205252 | 0.000000000 |
| 6 | 10.753410000  | -5.114310000 | 0.000000000 | 6  | -4.396068055 | -3.966593830 | 0.000000000 |
| 6 | 8.385367000   | -3.729332000 | 0.000000000 | 6  | -1.835225774 | -1.592241470 | 0.000000000 |
| 6 | 10.742369000  | -3.730663000 | 0.000000000 | 6  | -0.721287382 | -0.740872573 | 0.000000000 |
| 6 | 9.531704000   | -2.957376000 | 0.000000000 | 6  | -0.785705566 | 0.672011487  | 0.000000000 |
| 1 | 11.697836000  | -3.217453000 | 0.000000000 | 6  | -1.972021736 | 1.419405850  | 0.000000000 |
| 1 | 11.709912000  | -5.630040000 | 0.000000000 | 6  | -3.088038111 | 0.567161543  | 0.000000000 |
| 1 | -11.686850000 | -1.189172000 | 0.000000000 | 6  | -3.023566211 | -0.844536721 | 0.000000000 |
| 1 | -11.686850000 | 1.189172000  | 0.000000000 | 6  | -4.530078817 | -0.914446952 | 0.000000000 |
| 1 | -11.697836000 | 3.217453000  | 0.000000000 | 6  | -5.642181729 | -1.759679679 | 0.000000000 |
| 1 | -11.709912000 | 5.630040000  | 0.000000000 | 6  | -6.836482286 | -1.015657881 | 0.000000000 |
| 1 | -11.709912000 | -5.630040000 | 0.000000000 | 6  | -6.902440125 | 0.391489668  | 0.000000000 |
| 1 | -11.697836000 | -3.217453000 | 0.000000000 | 6  | -5.779508856 | 1.240524356  | 0.000000000 |
| 1 | -9.583567000  | -6.968336000 | 0.000000000 | 6  | -4.595032639 | 0.499795433  | 0.000000000 |
| 1 | -5.743133000  | -7.042112000 | 0.000000000 | 6  | -5.576981606 | -3.220814075 | 0.000000000 |
| 1 | 1.911154000   | -7.058058000 | 0.000000000 | 6  | -6.701581727 | -4.064778569 | 0.000000000 |
| 1 | -1.911154000  | -7.058058000 | 0.000000000 | 6  | -6.643402741 | -5.473858496 | 0.000000000 |
| 1 | 5.743133000   | -7.042112000 | 0.000000000 | 6  | -5.450659731 | -6.199173194 | 0.000000000 |
| 1 | 9.583567000   | -6.968336000 | 0.000000000 | 35 | -5.382863886 | -8.085015485 | 0.000000000 |
